# Supplementary material for: UV-Vis-NIR absorption spectra of lanthanide oxides and fluorides
Source: Royal Society of Chemistry journal article supplement (doi:10.1039/c9dt04921e), 2020-01-01
Supplement: c9dt04921e1.xlsx [file c9dt04921e1.xlsx]

## Sheet: PrF3
2500	0.24988		PrF3
2499.5	0.16305
2499	0.11678
2498.5	0.10492
2498	0.15909
2497.5	0.23398
2497	0.21165
2496.5	0.24022
2496	0.26371
2495.5	0.23255
2495	0.19938
2494.5	0.19212
2494	0.14722
2493.5	0.17675
2493	0.14819
2492.5	0.21622
2492	0.23359
2491.5	0.29119
2491	0.2241
2490.5	0.18647
2490	0.13198
2489.5	0.17034
2489	0.22665
2488.5	0.27219
2488	0.19944
2487.5	0.13714
2487	0.07976
2486.5	0.13207
2486	0.15667
2485.5	0.14855
2485	0.10156
2484.5	0.12244
2484	0.13682
2483.5	0.14315
2483	0.16768
2482.5	0.12902
2482	0.1651
2481.5	0.15184
2481	0.14062
2480.5	0.14604
2480	0.11547
2479.5	0.1264
2479	0.11778
2478.5	0.146
2478	0.09802
2477.5	0.12127
2477	0.09725
2476.5	0.12
2476	0.14008
2475.5	0.12796
2475	0.09054
2474.5	0.06771
2474	0.09201
2473.5	0.08163
2473	0.14803
2472.5	0.14321
2472	0.12309
2471.5	0.12374
2471	0.11199
2470.5	0.11917
2470	0.12364
2469.5	0.08958
2469	0.09823
2468.5	0.10686
2468	0.06585
2467.5	0.09545
2467	0.09268
2466.5	0.10109
2466	0.08272
2465.5	0.06528
2465	0.13141
2464.5	0.18998
2464	0.17555
2463.5	0.17943
2463	0.12479
2462.5	0.14687
2462	0.14044
2461.5	0.09359
2461	0.0611
2460.5	0.03685
2460	0.03808
2459.5	0.06197
2459	0.09894
2458.5	0.12811
2458	0.11125
2457.5	0.08816
2457	0.08308
2456.5	0.0477
2456	0.00779
2455.5	0.03511
2455	0.04247
2454.5	0.09588
2454	0.08891
2453.5	0.11418
2453	0.08451
2452.5	0.084
2452	0.08841
2451.5	0.09625
2451	0.09961
2450.5	0.12107
2450	0.14496
2449.5	0.16993
2449	0.17677
2448.5	0.15702
2448	0.17225
2447.5	0.10203
2447	0.05058
2446.5	0.04736
2446	0.03773
2445.5	0.07301
2445	0.13721
2444.5	0.13669
2444	0.14342
2443.5	0.08521
2443	0.0935
2442.5	0.11202
2442	0.14836
2441.5	0.15574
2441	0.09836
2440.5	0.0807
2440	0.06559
2439.5	0.05877
2439	0.0932
2438.5	0.08051
2438	0.0976
2437.5	0.11249
2437	0.09707
2436.5	0.10946
2436	0.10211
2435.5	0.10619
2435	0.10825
2434.5	0.08543
2434	0.10288
2433.5	0.09648
2433	0.05327
2432.5	0.06763
2432	0.07328
2431.5	0.06119
2431	0.04383
2430.5	0.04391
2430	0.06525
2429.5	0.05358
2429	0.04566
2428.5	0.05366
2428	0.09432
2427.5	0.09816
2427	0.06155
2426.5	0.05899
2426	0.05579
2425.5	0.07927
2425	0.13904
2424.5	0.13376
2424	0.11007
2423.5	0.10668
2423	0.12919
2422.5	0.10783
2422	0.08832
2421.5	0.07619
2421	0.06681
2420.5	0.07274
2420	0.10174
2419.5	0.11767
2419	0.15887
2418.5	0.17475
2418	0.13826
2417.5	0.08578
2417	0.04575
2416.5	0.0966
2416	0.1107
2415.5	0.11517
2415	0.12238
2414.5	0.1083
2414	0.07113
2413.5	0.04295
2413	0.0458
2412.5	0.0604
2412	0.06096
2411.5	0.08352
2411	0.08039
2410.5	0.07575
2410	0.08169
2409.5	0.0814
2409	0.11361
2408.5	0.13149
2408	0.11994
2407.5	0.11657
2407	0.12312
2406.5	0.13201
2406	0.10072
2405.5	0.06153
2405	0.06236
2404.5	0.07911
2404	0.13596
2403.5	0.12279
2403	0.12607
2402.5	0.14343
2402	0.12379
2401.5	0.12403
2401	0.08577
2400.5	0.07261
2400	0.08238
2399.5	0.09857
2399	0.10151
2398.5	0.10515
2398	0.07775
2397.5	0.08377
2397	0.09424
2396.5	0.06908
2396	0.04905
2395.5	0.06034
2395	0.03919
2394.5	0.07541
2394	0.0341
2393.5	0.07228
2393	0.10004
2392.5	0.1334
2392	0.11404
2391.5	0.09967
2391	0.0864
2390.5	0.06906
2390	0.07689
2389.5	0.06283
2389	0.06121
2388.5	0.01528
2388	0.03824
2387.5	0.0247
2387	0.06724
2386.5	0.09932
2386	0.11047
2385.5	0.12071
2385	0.0772
2384.5	0.07527
2384	0.07264
2383.5	0.08034
2383	0.07871
2382.5	0.08917
2382	0.07067
2381.5	0.09125
2381	0.09145
2380.5	0.11322
2380	0.09411
2379.5	0.07982
2379	0.10065
2378.5	0.11039
2378	0.11687
2377.5	0.08856
2377	0.04843
2376.5	0.02859
2376	0
2375.5	0.04532
2375	0.09402
2374.5	0.12749
2374	0.09041
2373.5	0.09161
2373	0.11529
2372.5	0.09513
2372	0.07364
2371.5	0.01428
2371	0.04799
2370.5	0.07388
2370	0.13397
2369.5	0.14995
2369	0.10487
2368.5	0.09522
2368	0.0767
2367.5	0.06872
2367	0.07078
2366.5	0.07285
2366	0.09165
2365.5	0.11505
2365	0.09207
2364.5	0.08451
2364	0.07208
2363.5	0.06682
2363	0.05881
2362.5	0.053
2362	0.07733
2361.5	0.05078
2361	0.03511
2360.5	0.02186
2360	0.04248
2359.5	0.07237
2359	0.08753
2358.5	0.07679
2358	0.04363
2357.5	0.04153
2357	0.04797
2356.5	0.05313
2356	0.05616
2355.5	0.07052
2355	0.08255
2354.5	0.07887
2354	0.07577
2353.5	0.0508
2353	0.06266
2352.5	0.02896
2352	0.04233
2351.5	0.03662
2351	0.06313
2350.5	0.09684
2350	0.11423
2349.5	0.08816
2349	0.07343
2348.5	0.08311
2348	0.05672
2347.5	0.06788
2347	0.07886
2346.5	0.08867
2346	0.09713
2345.5	0.05747
2345	0.04878
2344.5	0.02189
2344	0.07057
2343.5	0.07706
2343	0.12472
2342.5	0.10436
2342	0.09173
2341.5	0.09194
2341	0.09067
2340.5	0.08665
2340	0.06387
2339.5	0.04731
2339	0.03636
2338.5	0.05544
2338	0.03741
2337.5	0.0458
2337	0.04573
2336.5	0.03299
2336	0.04173
2335.5	0.05713
2335	0.0784
2334.5	0.08211
2334	0.06134
2333.5	0.0425
2333	0.02106
2332.5	0.02372
2332	0.0396
2331.5	0.05411
2331	0.04375
2330.5	0.02404
2330	0.03471
2329.5	0.03663
2329	0.06549
2328.5	0.07287
2328	0.06549
2327.5	0.06333
2327	0.05439
2326.5	0.0676
2326	0.06737
2325.5	0.06825
2325	0.07455
2324.5	0.06631
2324	0.06505
2323.5	0.07057
2323	0.07869
2322.5	0.10236
2322	0.08948
2321.5	0.06282
2321	0.05477
2320.5	0.01528
2320	0.04233
2319.5	0.07474
2319	0.11795
2318.5	0.14288
2318	0.14327
2317.5	0.13189
2317	0.10491
2316.5	0.08981
2316	0.0324
2315.5	0.04529
2315	0.05782
2314.5	0.09414
2314	0.09899
2313.5	0.09089
2313	0.07998
2312.5	0.06177
2312	0.06434
2311.5	0.0757
2311	0.09752
2310.5	0.09406
2310	0.09359
2309.5	0.09262
2309	0.06371
2308.5	0.06305
2308	0.06038
2307.5	0.06348
2307	0.06566
2306.5	0.06361
2306	0.06814
2305.5	0.09689
2305	0.11047
2304.5	0.13015
2304	0.08958
2303.5	0.09191
2303	0.09444
2302.5	0.11152
2302	0.0919
2301.5	0.09255
2301	0.07392
2300.5	0.09476
2300	0.08777
2299.5	0.10229
2299	0.09388
2298.5	0.08722
2298	0.07944
2297.5	0.1074
2297	0.10925
2296.5	0.11754
2296	0.08601
2295.5	0.09048
2295	0.08942
2294.5	0.1051
2294	0.11528
2293.5	0.11772
2293	0.12777
2292.5	0.10351
2292	0.07717
2291.5	0.07788
2291	0.09144
2290.5	0.11192
2290	0.09903
2289.5	0.0745
2289	0.05598
2288.5	0.05133
2288	0.08956
2287.5	0.11493
2287	0.12677
2286.5	0.13782
2286	0.09515
2285.5	0.0993
2285	0.09089
2284.5	0.08469
2284	0.09348
2283.5	0.09608
2283	0.11008
2282.5	0.10103
2282	0.11681
2281.5	0.12869
2281	0.12268
2280.5	0.12645
2280	0.12635
2279.5	0.12358
2279	0.11748
2278.5	0.1038
2278	0.13434
2277.5	0.14552
2277	0.1468
2276.5	0.15175
2276	0.15064
2275.5	0.1437
2275	0.13581
2274.5	0.12461
2274	0.12505
2273.5	0.10424
2273	0.10487
2272.5	0.09652
2272	0.10291
2271.5	0.09552
2271	0.1024
2270.5	0.11219
2270	0.1251
2269.5	0.13176
2269	0.11625
2268.5	0.11684
2268	0.0972
2267.5	0.10217
2267	0.10588
2266.5	0.09618
2266	0.08902
2265.5	0.07209
2265	0.0881
2264.5	0.0988
2264	0.10707
2263.5	0.08846
2263	0.08044
2262.5	0.07454
2262	0.09083
2261.5	0.08958
2261	0.10607
2260.5	0.10108
2260	0.11117
2259.5	0.11911
2259	0.09962
2258.5	0.12223
2258	0.12421
2257.5	0.1356
2257	0.11996
2256.5	0.09678
2256	0.10106
2255.5	0.10183
2255	0.09914
2254.5	0.08691
2254	0.08002
2253.5	0.0773
2253	0.09725
2252.5	0.09327
2252	0.1103
2251.5	0.07714
2251	0.08008
2250.5	0.07606
2250	0.08365
2249.5	0.08727
2249	0.10122
2248.5	0.08494
2248	0.09584
2247.5	0.11191
2247	0.11388
2246.5	0.12073
2246	0.098
2245.5	0.10421
2245	0.09088
2244.5	0.08551
2244	0.08759
2243.5	0.08565
2243	0.10213
2242.5	0.11645
2242	0.12421
2241.5	0.10992
2241	0.09915
2240.5	0.09834
2240	0.10429
2239.5	0.09878
2239	0.08455
2238.5	0.06037
2238	0.07109
2237.5	0.09527
2237	0.098
2236.5	0.10516
2236	0.10406
2235.5	0.10345
2235	0.10291
2234.5	0.11179
2234	0.12698
2233.5	0.13952
2233	0.13021
2232.5	0.14837
2232	0.11862
2231.5	0.12005
2231	0.0934
2230.5	0.11539
2230	0.10534
2229.5	0.11565
2229	0.12341
2228.5	0.11731
2228	0.10766
2227.5	0.12273
2227	0.12414
2226.5	0.12611
2226	0.11862
2225.5	0.10897
2225	0.12302
2224.5	0.12461
2224	0.12744
2223.5	0.11067
2223	0.10714
2222.5	0.10716
2222	0.11716
2221.5	0.11015
2221	0.12647
2220.5	0.10654
2220	0.09642
2219.5	0.09683
2219	0.11321
2218.5	0.09977
2218	0.10733
2217.5	0.09376
2217	0.10028
2216.5	0.12055
2216	0.11476
2215.5	0.12034
2215	0.12
2214.5	0.13886
2214	0.15342
2213.5	0.13785
2213	0.13915
2212.5	0.13028
2212	0.14565
2211.5	0.13588
2211	0.15179
2210.5	0.12904
2210	0.11316
2209.5	0.11387
2209	0.11126
2208.5	0.12077
2208	0.11864
2207.5	0.11262
2207	0.11904
2206.5	0.12405
2206	0.12572
2205.5	0.12957
2205	0.10567
2204.5	0.12363
2204	0.12202
2203.5	0.14633
2203	0.1353
2202.5	0.11243
2202	0.11902
2201.5	0.11519
2201	0.10634
2200.5	0.10308
2200	0.10631
2199.5	0.11305
2199	0.11244
2198.5	0.13263
2198	0.15142
2197.5	0.14705
2197	0.12094
2196.5	0.08718
2196	0.06504
2195.5	0.06369
2195	0.07832
2194.5	0.10158
2194	0.10003
2193.5	0.07514
2193	0.09497
2192.5	0.09628
2192	0.09289
2191.5	0.0935
2191	0.09223
2190.5	0.10031
2190	0.09827
2189.5	0.09351
2189	0.0699
2188.5	0.08135
2188	0.04953
2187.5	0.04173
2187	0.0395
2186.5	0.06317
2186	0.09508
2185.5	0.09833
2185	0.10811
2184.5	0.06829
2184	0.06105
2183.5	0.04942
2183	0.06939
2182.5	0.05685
2182	0.04454
2181.5	0.04475
2181	0.06242
2180.5	0.06252
2180	0.08948
2179.5	0.08008
2179	0.07762
2178.5	0.07775
2178	0.05765
2177.5	0.06607
2177	0.05895
2176.5	0.06658
2176	0.05634
2175.5	0.08146
2175	0.06991
2174.5	0.05776
2174	0.04784
2173.5	0.06778
2173	0.06551
2172.5	0.06803
2172	0.04311
2171.5	0.04893
2171	0.05344
2170.5	0.06104
2170	0.07192
2169.5	0.0712
2169	0.06846
2168.5	0.05139
2168	0.05673
2167.5	0.04972
2167	0.04899
2166.5	0.04846
2166	0.05631
2165.5	0.07186
2165	0.05781
2164.5	0.06559
2164	0.05183
2163.5	0.04429
2163	0.06051
2162.5	0.05129
2162	0.06402
2161.5	0.06843
2161	0.06534
2160.5	0.08445
2160	0.07154
2159.5	0.08534
2159	0.09504
2158.5	0.09123
2158	0.09466
2157.5	0.08316
2157	0.08352
2156.5	0.06756
2156	0.07134
2155.5	0.06603
2155	0.06577
2154.5	0.07157
2154	0.0748
2153.5	0.0901
2153	0.08547
2152.5	0.06424
2152	0.06151
2151.5	0.06294
2151	0.06435
2150.5	0.07304
2150	0.07767
2149.5	0.1
2149	0.09902
2148.5	0.07448
2148	0.07496
2147.5	0.07146
2147	0.08031
2146.5	0.09282
2146	0.06701
2145.5	0.08191
2145	0.07271
2144.5	0.0833
2144	0.07469
2143.5	0.0742
2143	0.07511
2142.5	0.06682
2142	0.07261
2141.5	0.08231
2141	0.08729
2140.5	0.07747
2140	0.06358
2139.5	0.077
2139	0.09207
2138.5	0.09335
2138	0.08705
2137.5	0.08706
2137	0.07604
2136.5	0.07507
2136	0.07057
2135.5	0.06139
2135	0.06555
2134.5	0.06102
2134	0.05961
2133.5	0.0574
2133	0.07633
2132.5	0.06878
2132	0.07893
2131.5	0.06437
2131	0.07091
2130.5	0.06733
2130	0.06025
2129.5	0.04909
2129	0.06525
2128.5	0.07922
2128	0.08059
2127.5	0.08538
2127	0.08721
2126.5	0.08942
2126	0.09595
2125.5	0.08822
2125	0.0741
2124.5	0.0792
2124	0.06112
2123.5	0.05699
2123	0.05288
2122.5	0.07179
2122	0.06994
2121.5	0.06922
2121	0.06699
2120.5	0.07007
2120	0.07163
2119.5	0.06458
2119	0.05757
2118.5	0.0607
2118	0.04453
2117.5	0.05355
2117	0.04368
2116.5	0.06412
2116	0.05813
2115.5	0.06971
2115	0.06186
2114.5	0.05578
2114	0.06422
2113.5	0.05353
2113	0.06713
2112.5	0.05503
2112	0.05179
2111.5	0.05219
2111	0.04848
2110.5	0.05538
2110	0.06842
2109.5	0.08076
2109	0.09132
2108.5	0.07979
2108	0.07863
2107.5	0.05436
2107	0.06541
2106.5	0.06794
2106	0.0685
2105.5	0.0795
2105	0.06353
2104.5	0.06102
2104	0.04817
2103.5	0.05092
2103	0.04926
2102.5	0.03243
2102	0.04082
2101.5	0.0428
2101	0.07579
2100.5	0.07698
2100	0.06673
2099.5	0.07019
2099	0.04333
2098.5	0.04285
2098	0.04883
2097.5	0.06427
2097	0.07011
2096.5	0.07293
2096	0.05964
2095.5	0.06504
2095	0.0427
2094.5	0.05427
2094	0.05518
2093.5	0.06939
2093	0.07498
2092.5	0.07269
2092	0.06945
2091.5	0.07487
2091	0.07034
2090.5	0.07079
2090	0.06601
2089.5	0.05109
2089	0.05316
2088.5	0.0425
2088	0.06656
2087.5	0.06403
2087	0.0686
2086.5	0.06248
2086	0.06908
2085.5	0.06773
2085	0.06143
2084.5	0.07911
2084	0.08684
2083.5	0.08526
2083	0.07641
2082.5	0.08165
2082	0.08904
2081.5	0.10886
2081	0.09172
2080.5	0.05704
2080	0.07023
2079.5	0.05213
2079	0.06062
2078.5	0.0434
2078	0.05523
2077.5	0.0541
2077	0.06183
2076.5	0.04946
2076	0.05184
2075.5	0.04879
2075	0.06014
2074.5	0.06393
2074	0.07007
2073.5	0.07123
2073	0.07079
2072.5	0.06256
2072	0.06384
2071.5	0.07636
2071	0.07331
2070.5	0.05685
2070	0.05308
2069.5	0.04954
2069	0.07628
2068.5	0.05583
2068	0.07288
2067.5	0.05819
2067	0.05798
2066.5	0.05136
2066	0.05962
2065.5	0.06717
2065	0.07719
2064.5	0.07915
2064	0.07128
2063.5	0.0815
2063	0.07815
2062.5	0.08844
2062	0.08934
2061.5	0.09588
2061	0.09287
2060.5	0.09651
2060	0.09658
2059.5	0.10522
2059	0.08209
2058.5	0.08119
2058	0.08149
2057.5	0.09869
2057	0.10499
2056.5	0.09608
2056	0.09775
2055.5	0.10171
2055	0.0974
2054.5	0.09513
2054	0.07543
2053.5	0.06682
2053	0.06533
2052.5	0.07531
2052	0.07523
2051.5	0.07916
2051	0.08195
2050.5	0.06325
2050	0.07542
2049.5	0.09103
2049	0.1194
2048.5	0.12688
2048	0.13712
2047.5	0.11947
2047	0.11164
2046.5	0.10888
2046	0.11657
2045.5	0.12732
2045	0.11929
2044.5	0.12162
2044	0.11876
2043.5	0.13164
2043	0.1273
2042.5	0.12537
2042	0.12593
2041.5	0.1067
2041	0.11964
2040.5	0.11321
2040	0.1261
2039.5	0.11635
2039	0.12314
2038.5	0.11575
2038	0.12579
2037.5	0.12283
2037	0.1267
2036.5	0.1142
2036	0.11612
2035.5	0.13469
2035	0.13765
2034.5	0.15372
2034	0.1462
2033.5	0.16648
2033	0.17621
2032.5	0.14796
2032	0.14521
2031.5	0.13455
2031	0.12727
2030.5	0.15264
2030	0.14135
2029.5	0.17666
2029	0.18012
2028.5	0.19292
2028	0.20189
2027.5	0.21062
2027	0.21243
2026.5	0.2041
2026	0.19588
2025.5	0.19363
2025	0.19056
2024.5	0.19893
2024	0.18878
2023.5	0.20967
2023	0.20149
2022.5	0.21412
2022	0.21274
2021.5	0.2106
2021	0.2043
2020.5	0.21698
2020	0.22421
2019.5	0.2279
2019	0.20621
2018.5	0.2179
2018	0.23879
2017.5	0.23894
2017	0.25363
2016.5	0.23431
2016	0.23571
2015.5	0.21607
2015	0.20601
2014.5	0.20151
2014	0.23378
2013.5	0.25491
2013	0.24805
2012.5	0.25696
2012	0.2375
2011.5	0.23745
2011	0.23734
2010.5	0.25182
2010	0.252
2009.5	0.27455
2009	0.27428
2008.5	0.27843
2008	0.28139
2007.5	0.29856
2007	0.27275
2006.5	0.28016
2006	0.25671
2005.5	0.27702
2005	0.26291
2004.5	0.26166
2004	0.26624
2003.5	0.25308
2003	0.24974
2002.5	0.25519
2002	0.26671
2001.5	0.27167
2001	0.27691
2000.5	0.26602
2000	0.26306
1999.5	0.27073
1999	0.27776
1998.5	0.27984
1998	0.29196
1997.5	0.30464
1997	0.30461
1996.5	0.29542
1996	0.29543
1995.5	0.29745
1995	0.28717
1994.5	0.2995
1994	0.29107
1993.5	0.27596
1993	0.27193
1992.5	0.27204
1992	0.30886
1991.5	0.31887
1991	0.32302
1990.5	0.29364
1990	0.30069
1989.5	0.29297
1989	0.28899
1988.5	0.27546
1988	0.27538
1987.5	0.286
1987	0.29675
1986.5	0.29341
1986	0.29925
1985.5	0.29958
1985	0.31372
1984.5	0.30332
1984	0.27405
1983.5	0.26975
1983	0.27213
1982.5	0.30146
1982	0.3132
1981.5	0.33463
1981	0.34549
1980.5	0.35154
1980	0.32246
1979.5	0.32476
1979	0.30019
1978.5	0.30156
1978	0.32469
1977.5	0.293
1977	0.3248
1976.5	0.31753
1976	0.30012
1975.5	0.29139
1975	0.28327
1974.5	0.30706
1974	0.3115
1973.5	0.31692
1973	0.31954
1972.5	0.33351
1972	0.33375
1971.5	0.32017
1971	0.30362
1970.5	0.2773
1970	0.28329
1969.5	0.29684
1969	0.3064
1968.5	0.32065
1968	0.32928
1967.5	0.31464
1967	0.31174
1966.5	0.30529
1966	0.33241
1965.5	0.37185
1965	0.3955
1964.5	0.39921
1964	0.39985
1963.5	0.36526
1963	0.36225
1962.5	0.32497
1962	0.34675
1961.5	0.35839
1961	0.37481
1960.5	0.39551
1960	0.39885
1959.5	0.4213
1959	0.42061
1958.5	0.43166
1958	0.42732
1957.5	0.41832
1957	0.39281
1956.5	0.39248
1956	0.40048
1955.5	0.42715
1955	0.42624
1954.5	0.41423
1954	0.40908
1953.5	0.39239
1953	0.4285
1952.5	0.39602
1952	0.42986
1951.5	0.4136
1951	0.42902
1950.5	0.43134
1950	0.44835
1949.5	0.44185
1949	0.43796
1948.5	0.43248
1948	0.45501
1947.5	0.45185
1947	0.45473
1946.5	0.44437
1946	0.45555
1945.5	0.46294
1945	0.48038
1944.5	0.46218
1944	0.46718
1943.5	0.44629
1943	0.46224
1942.5	0.44734
1942	0.44133
1941.5	0.43357
1941	0.44832
1940.5	0.44391
1940	0.43862
1939.5	0.46318
1939	0.45087
1938.5	0.45769
1938	0.4379
1937.5	0.46854
1937	0.46838
1936.5	0.45869
1936	0.43472
1935.5	0.45718
1935	0.42229
1934.5	0.4285
1934	0.43538
1933.5	0.45378
1933	0.4709
1932.5	0.47632
1932	0.47346
1931.5	0.43286
1931	0.40121
1930.5	0.36272
1930	0.35435
1929.5	0.38976
1929	0.41333
1928.5	0.40924
1928	0.38962
1927.5	0.38777
1927	0.39937
1926.5	0.41831
1926	0.39466
1925.5	0.39175
1925	0.36802
1924.5	0.3653
1924	0.36229
1923.5	0.37923
1923	0.39158
1922.5	0.39736
1922	0.39476
1921.5	0.37257
1921	0.37675
1920.5	0.3619
1920	0.35657
1919.5	0.36114
1919	0.34093
1918.5	0.35605
1918	0.35047
1917.5	0.36132
1917	0.34438
1916.5	0.34336
1916	0.35388
1915.5	0.33735
1915	0.35118
1914.5	0.36652
1914	0.37589
1913.5	0.36566
1913	0.3404
1912.5	0.30154
1912	0.2934
1911.5	0.29536
1911	0.31748
1910.5	0.32951
1910	0.2925
1909.5	0.28291
1909	0.29389
1908.5	0.31635
1908	0.31835
1907.5	0.31278
1907	0.30747
1906.5	0.29224
1906	0.2812
1905.5	0.27098
1905	0.28177
1904.5	0.27747
1904	0.29879
1903.5	0.30569
1903	0.30138
1902.5	0.2885
1902	0.27163
1901.5	0.26391
1901	0.26272
1900.5	0.28336
1900	0.31686
1899.5	0.30197
1899	0.30839
1898.5	0.29471
1898	0.29764
1897.5	0.2852
1897	0.26595
1896.5	0.27274
1896	0.27174
1895.5	0.27839
1895	0.27672
1894.5	0.27497
1894	0.2953
1893.5	0.31328
1893	0.32448
1892.5	0.30982
1892	0.28701
1891.5	0.28974
1891	0.30304
1890.5	0.30413
1890	0.30859
1889.5	0.3186
1889	0.3168
1888.5	0.31306
1888	0.30572
1887.5	0.29337
1887	0.29714
1886.5	0.29245
1886	0.29848
1885.5	0.27776
1885	0.27538
1884.5	0.27463
1884	0.28055
1883.5	0.28484
1883	0.2735
1882.5	0.25722
1882	0.25688
1881.5	0.25927
1881	0.26898
1880.5	0.26733
1880	0.25794
1879.5	0.2364
1879	0.23261
1878.5	0.2357
1878	0.24372
1877.5	0.23911
1877	0.2396
1876.5	0.23599
1876	0.23185
1875.5	0.22696
1875	0.22427
1874.5	0.21005
1874	0.19822
1873.5	0.19387
1873	0.18953
1872.5	0.19639
1872	0.18941
1871.5	0.1943
1871	0.18991
1870.5	0.18574
1870	0.18106
1869.5	0.17352
1869	0.17909
1868.5	0.18069
1868	0.18128
1867.5	0.1827
1867	0.17566
1866.5	0.18352
1866	0.17165
1865.5	0.1644
1865	0.15959
1864.5	0.16218
1864	0.16358
1863.5	0.15868
1863	0.15074
1862.5	0.14597
1862	0.14572
1861.5	0.14878
1861	0.14499
1860.5	0.14621
1860	0.14654
1859.5	0.14384
1859	0.14388
1858.5	0.13792
1858	0.14116
1857.5	0.14026
1857	0.14009
1856.5	0.14371
1856	0.14183
1855.5	0.14119
1855	0.14525
1854.5	0.14829
1854	0.143
1853.5	0.1372
1853	0.13181
1852.5	0.12827
1852	0.13332
1851.5	0.13303
1851	0.13628
1850.5	0.13365
1850	0.13261
1849.5	0.13202
1849	0.12894
1848.5	0.1296
1848	0.12637
1847.5	0.12496
1847	0.12645
1846.5	0.12628
1846	0.12603
1845.5	0.12006
1845	0.12306
1844.5	0.12138
1844	0.12388
1843.5	0.11706
1843	0.11858
1842.5	0.11773
1842	0.1255
1841.5	0.12792
1841	0.12728
1840.5	0.1231
1840	0.1199
1839.5	0.12041
1839	0.11883
1838.5	0.11574
1838	0.11563
1837.5	0.11585
1837	0.11576
1836.5	0.11359
1836	0.11321
1835.5	0.11436
1835	0.11565
1834.5	0.11517
1834	0.11561
1833.5	0.11414
1833	0.11265
1832.5	0.11521
1832	0.11174
1831.5	0.11339
1831	0.11181
1830.5	0.10957
1830	0.1108
1829.5	0.10899
1829	0.1074
1828.5	0.10167
1828	0.10353
1827.5	0.10214
1827	0.10328
1826.5	0.10374
1826	0.10744
1825.5	0.10694
1825	0.10069
1824.5	0.10056
1824	0.10094
1823.5	0.10261
1823	0.10458
1822.5	0.10088
1822	0.10574
1821.5	0.10005
1821	0.10421
1820.5	0.09994
1820	0.09692
1819.5	0.09597
1819	0.09953
1818.5	0.10407
1818	0.10206
1817.5	0.10454
1817	0.0994
1816.5	0.09992
1816	0.09764
1815.5	0.09895
1815	0.0982
1814.5	0.09951
1814	0.09599
1813.5	0.0953
1813	0.09198
1812.5	0.09008
1812	0.09027
1811.5	0.09095
1811	0.09053
1810.5	0.09152
1810	0.09325
1809.5	0.09306
1809	0.09379
1808.5	0.09339
1808	0.09076
1807.5	0.08962
1807	0.08957
1806.5	0.09281
1806	0.09362
1805.5	0.09715
1805	0.09651
1804.5	0.0943
1804	0.08705
1803.5	0.0875
1803	0.08822
1802.5	0.09083
1802	0.08876
1801.5	0.08602
1801	0.08418
1800.5	0.0829
1800	0.08529
1799.5	0.08658
1799	0.08597
1798.5	0.08798
1798	0.08841
1797.5	0.08939
1797	0.08705
1796.5	0.08688
1796	0.08675
1795.5	0.08419
1795	0.08439
1794.5	0.08724
1794	0.08678
1793.5	0.0853
1793	0.08306
1792.5	0.08276
1792	0.08136
1791.5	0.08123
1791	0.07962
1790.5	0.08175
1790	0.08063
1789.5	0.07937
1789	0.07888
1788.5	0.07905
1788	0.08077
1787.5	0.08089
1787	0.08273
1786.5	0.08033
1786	0.08103
1785.5	0.0825
1785	0.08191
1784.5	0.08113
1784	0.07857
1783.5	0.07995
1783	0.0795
1782.5	0.07812
1782	0.07833
1781.5	0.07722
1781	0.07648
1780.5	0.07591
1780	0.07778
1779.5	0.07632
1779	0.07489
1778.5	0.07393
1778	0.07153
1777.5	0.07357
1777	0.07242
1776.5	0.073
1776	0.07217
1775.5	0.07195
1775	0.07039
1774.5	0.0701
1774	0.06838
1773.5	0.06854
1773	0.06895
1772.5	0.06905
1772	0.06892
1771.5	0.06839
1771	0.06996
1770.5	0.06844
1770	0.06977
1769.5	0.06881
1769	0.068
1768.5	0.06717
1768	0.06886
1767.5	0.06864
1767	0.06899
1766.5	0.06862
1766	0.06837
1765.5	0.06565
1765	0.06703
1764.5	0.0674
1764	0.07023
1763.5	0.06631
1763	0.06312
1762.5	0.06152
1762	0.06273
1761.5	0.06186
1761	0.06297
1760.5	0.06172
1760	0.06129
1759.5	0.06296
1759	0.06354
1758.5	0.06231
1758	0.06257
1757.5	0.06122
1757	0.06251
1756.5	0.06097
1756	0.06037
1755.5	0.06178
1755	0.0613
1754.5	0.06078
1754	0.05872
1753.5	0.05867
1753	0.05831
1752.5	0.05993
1752	0.05847
1751.5	0.05793
1751	0.05826
1750.5	0.05934
1750	0.05947
1749.5	0.0581
1749	0.05779
1748.5	0.05841
1748	0.05994
1747.5	0.06037
1747	0.06089
1746.5	0.05972
1746	0.0595
1745.5	0.05879
1745	0.05942
1744.5	0.06063
1744	0.06108
1743.5	0.06142
1743	0.06117
1742.5	0.06095
1742	0.06025
1741.5	0.06012
1741	0.05875
1740.5	0.05797
1740	0.05851
1739.5	0.05797
1739	0.05866
1738.5	0.05923
1738	0.05884
1737.5	0.05875
1737	0.05689
1736.5	0.0583
1736	0.05924
1735.5	0.06105
1735	0.0608
1734.5	0.05985
1734	0.06
1733.5	0.05899
1733	0.05812
1732.5	0.05725
1732	0.05729
1731.5	0.05649
1731	0.05561
1730.5	0.05759
1730	0.05917
1729.5	0.06073
1729	0.05915
1728.5	0.06002
1728	0.05931
1727.5	0.0608
1727	0.05917
1726.5	0.05866
1726	0.058
1725.5	0.05961
1725	0.05991
1724.5	0.06005
1724	0.06039
1723.5	0.06037
1723	0.06075
1722.5	0.05998
1722	0.06214
1721.5	0.06229
1721	0.0631
1720.5	0.06268
1720	0.06242
1719.5	0.06405
1719	0.0642
1718.5	0.06507
1718	0.06358
1717.5	0.06295
1717	0.06428
1716.5	0.06592
1716	0.06737
1715.5	0.06638
1715	0.06754
1714.5	0.06844
1714	0.07036
1713.5	0.07148
1713	0.07268
1712.5	0.07262
1712	0.07248
1711.5	0.07245
1711	0.07269
1710.5	0.07391
1710	0.07532
1709.5	0.07701
1709	0.07796
1708.5	0.07703
1708	0.07721
1707.5	0.07844
1707	0.08227
1706.5	0.08645
1706	0.0856
1705.5	0.08389
1705	0.08582
1704.5	0.08919
1704	0.09305
1703.5	0.09627
1703	0.09549
1702.5	0.09775
1702	0.09627
1701.5	0.10087
1701	0.10532
1700.5	0.10883
1700	0.11162
1699.5	0.11469
1699	0.11455
1698.5	0.1197
1698	0.12022
1697.5	0.12215
1697	0.12421
1696.5	0.12711
1696	0.13077
1695.5	0.13265
1695	0.13494
1694.5	0.13942
1694	0.14502
1693.5	0.14546
1693	0.14677
1692.5	0.14775
1692	0.15325
1691.5	0.15777
1691	0.16136
1690.5	0.16089
1690	0.16771
1689.5	0.17149
1689	0.1771
1688.5	0.17956
1688	0.18362
1687.5	0.18775
1687	0.19199
1686.5	0.19717
1686	0.19951
1685.5	0.20175
1685	0.20219
1684.5	0.20665
1684	0.21254
1683.5	0.21858
1683	0.22275
1682.5	0.22623
1682	0.22771
1681.5	0.2326
1681	0.239
1680.5	0.24322
1680	0.24868
1679.5	0.24973
1679	0.25117
1678.5	0.25143
1678	0.25475
1677.5	0.25905
1677	0.26201
1676.5	0.26544
1676	0.26659
1675.5	0.27097
1675	0.27259
1674.5	0.27458
1674	0.27713
1673.5	0.27691
1673	0.27835
1672.5	0.27772
1672	0.27865
1671.5	0.28111
1671	0.28297
1670.5	0.28285
1670	0.28432
1669.5	0.28571
1669	0.28626
1668.5	0.29037
1668	0.29328
1667.5	0.29429
1667	0.29111
1666.5	0.28954
1666	0.28966
1665.5	0.29146
1665	0.29323
1664.5	0.29586
1664	0.29585
1663.5	0.2972
1663	0.29802
1662.5	0.30054
1662	0.30185
1661.5	0.30269
1661	0.30114
1660.5	0.3036
1660	0.30945
1659.5	0.31286
1659	0.31715
1658.5	0.31832
1658	0.31851
1657.5	0.31891
1657	0.32053
1656.5	0.32404
1656	0.32752
1655.5	0.33227
1655	0.33373
1654.5	0.33789
1654	0.34258
1653.5	0.34656
1653	0.35099
1652.5	0.35344
1652	0.35718
1651.5	0.3614
1651	0.36775
1650.5	0.37112
1650	0.37168
1649.5	0.37146
1649	0.37429
1648.5	0.37882
1648	0.38629
1647.5	0.38933
1647	0.39576
1646.5	0.39975
1646	0.40464
1645.5	0.40784
1645	0.41055
1644.5	0.41472
1644	0.41528
1643.5	0.41374
1643	0.41457
1642.5	0.41631
1642	0.4192
1641.5	0.4229
1641	0.42549
1640.5	0.42429
1640	0.42451
1639.5	0.4279
1639	0.43274
1638.5	0.43724
1638	0.43846
1637.5	0.44055
1637	0.44446
1636.5	0.44787
1636	0.4468
1635.5	0.44472
1635	0.446
1634.5	0.44799
1634	0.45135
1633.5	0.45723
1633	0.45988
1632.5	0.46132
1632	0.45766
1631.5	0.46324
1631	0.46684
1630.5	0.47262
1630	0.47485
1629.5	0.4776
1629	0.47828
1628.5	0.47867
1628	0.47948
1627.5	0.48143
1627	0.4826
1626.5	0.48481
1626	0.48778
1625.5	0.493
1625	0.4958
1624.5	0.49525
1624	0.49894
1623.5	0.50072
1623	0.50642
1622.5	0.50843
1622	0.50879
1621.5	0.51017
1621	0.51066
1620.5	0.51308
1620	0.51471
1619.5	0.51892
1619	0.51942
1618.5	0.52174
1618	0.52398
1617.5	0.52609
1617	0.52814
1616.5	0.53069
1616	0.53276
1615.5	0.53607
1615	0.53782
1614.5	0.54185
1614	0.54318
1613.5	0.54649
1613	0.54279
1612.5	0.54609
1612	0.54564
1611.5	0.55208
1611	0.55413
1610.5	0.55474
1610	0.55544
1609.5	0.55524
1609	0.56059
1608.5	0.56549
1608	0.56778
1607.5	0.56981
1607	0.5698
1606.5	0.57049
1606	0.57898
1605.5	0.58349
1605	0.58972
1604.5	0.59357
1604	0.59572
1603.5	0.60238
1603	0.60215
1602.5	0.60708
1602	0.61268
1601.5	0.61945
1601	0.62349
1600.5	0.62151
1600	0.62294
1599.5	0.62042
1599	0.62523
1598.5	0.62789
1598	0.63823
1597.5	0.64032
1597	0.64349
1596.5	0.64651
1596	0.65135
1595.5	0.65592
1595	0.65767
1594.5	0.66774
1594	0.6713
1593.5	0.67525
1593	0.67389
1592.5	0.67248
1592	0.6697
1591.5	0.67387
1591	0.68351
1590.5	0.69143
1590	0.69431
1589.5	0.69798
1589	0.69485
1588.5	0.6976
1588	0.69309
1587.5	0.69871
1587	0.70094
1586.5	0.70837
1586	0.70862
1585.5	0.70982
1585	0.70771
1584.5	0.71301
1584	0.71629
1583.5	0.72143
1583	0.72371
1582.5	0.72527
1582	0.72951
1581.5	0.73477
1581	0.73891
1580.5	0.74122
1580	0.73973
1579.5	0.74939
1579	0.75013
1578.5	0.75657
1578	0.75841
1577.5	0.76603
1577	0.76995
1576.5	0.7744
1576	0.78113
1575.5	0.78712
1575	0.79568
1574.5	0.80193
1574	0.8085
1573.5	0.80996
1573	0.81755
1572.5	0.82809
1572	0.84041
1571.5	0.84769
1571	0.85679
1570.5	0.86902
1570	0.88031
1569.5	0.88911
1569	0.89501
1568.5	0.9045
1568	0.90636
1567.5	0.91196
1567	0.91424
1566.5	0.91623
1566	0.92428
1565.5	0.93232
1565	0.93894
1564.5	0.94361
1564	0.94726
1563.5	0.95501
1563	0.94809
1562.5	0.95463
1562	0.94843
1561.5	0.95714
1561	0.96212
1560.5	0.96475
1560	0.96759
1559.5	0.96775
1559	0.97178
1558.5	0.96483
1558	0.96619
1557.5	0.97217
1557	0.97256
1556.5	0.9687
1556	0.96681
1555.5	0.96694
1555	0.96492
1554.5	0.96229
1554	0.96893
1553.5	0.97321
1553	0.97329
1552.5	0.96714
1552	0.96299
1551.5	0.95949
1551	0.96633
1550.5	0.96367
1550	0.95929
1549.5	0.9516
1549	0.95519
1548.5	0.9601
1548	0.97283
1547.5	0.96824
1547	0.96721
1546.5	0.96186
1546	0.96352
1545.5	0.96841
1545	0.96647
1544.5	0.96916
1544	0.96556
1543.5	0.96855
1543	0.97431
1542.5	0.98177
1542	0.98392
1541.5	0.97565
1541	0.97872
1540.5	0.9817
1540	0.98838
1539.5	0.98458
1539	0.98459
1538.5	0.97796
1538	0.98635
1537.5	0.99498
1537	1
1536.5	0.99896
1536	0.99717
1535.5	0.99773
1535	0.99411
1534.5	0.99485
1534	0.98862
1533.5	0.98846
1533	0.98875
1532.5	0.98519
1532	0.98239
1531.5	0.97629
1531	0.97778
1530.5	0.966
1530	0.96226
1529.5	0.95639
1529	0.95613
1528.5	0.95087
1528	0.9422
1527.5	0.93483
1527	0.93134
1526.5	0.93279
1526	0.93618
1525.5	0.93665
1525	0.93245
1524.5	0.92489
1524	0.92331
1523.5	0.92388
1523	0.92645
1522.5	0.92155
1522	0.92019
1521.5	0.91712
1521	0.91725
1520.5	0.91521
1520	0.91547
1519.5	0.91524
1519	0.91571
1518.5	0.9134
1518	0.91723
1517.5	0.92519
1517	0.9302
1516.5	0.93351
1516	0.93109
1515.5	0.92978
1515	0.9269
1514.5	0.92665
1514	0.92393
1513.5	0.92535
1513	0.92736
1512.5	0.92431
1512	0.91715
1511.5	0.90989
1511	0.89831
1510.5	0.89417
1510	0.88099
1509.5	0.87496
1509	0.86535
1508.5	0.85874
1508	0.846
1507.5	0.83576
1507	0.82635
1506.5	0.82246
1506	0.81693
1505.5	0.80375
1505	0.79395
1504.5	0.78339
1504	0.77724
1503.5	0.77227
1503	0.76885
1502.5	0.7605
1502	0.75701
1501.5	0.75085
1501	0.74608
1500.5	0.74501
[truncated: 2,601 more rows]

## Sheet: Pr6O11
2500	0.0244		Pr6O11
2499.5	0.02235
2499	0.02376
2498.5	0.01669
2498	0.01837
2497.5	0.01807
2497	0.01541
2496.5	0.01606
2496	0.01771
2495.5	0.01719
2495	0.01995
2494.5	0.0219
2494	0.02186
2493.5	0.02327
2493	0.02976
2492.5	0.02751
2492	0.02928
2491.5	0.03023
2491	0.02739
2490.5	0.02684
2490	0.02439
2489.5	0.02166
2489	0.01702
2488.5	0.01878
2488	0.01989
2487.5	0.02098
2487	0.02009
2486.5	0.01882
2486	0.0201
2485.5	0.02266
2485	0.02139
2484.5	0.02072
2484	0.02065
2483.5	0.02006
2483	0.0237
2482.5	0.02471
2482	0.02161
2481.5	0.02273
2481	0.02097
2480.5	0.02301
2480	0.0192
2479.5	0.01984
2479	0.01861
2478.5	0.0205
2478	0.02175
2477.5	0.01897
2477	0.01791
2476.5	0.01829
2476	0.01589
2475.5	0.01914
2475	0.02254
2474.5	0.02451
2474	0.02497
2473.5	0.02725
2473	0.02663
2472.5	0.02629
2472	0.02422
2471.5	0.02635
2471	0.03147
2470.5	0.03196
2470	0.03039
2469.5	0.03142
2469	0.03176
2468.5	0.02829
2468	0.0285
2467.5	0.02892
2467	0.02972
2466.5	0.0323
2466	0.03353
2465.5	0.03308
2465	0.03139
2464.5	0.03101
2464	0.03237
2463.5	0.03168
2463	0.03209
2462.5	0.02759
2462	0.0276
2461.5	0.0293
2461	0.02728
2460.5	0.02803
2460	0.02837
2459.5	0.031
2459	0.03121
2458.5	0.03302
2458	0.03116
2457.5	0.02969
2457	0.02812
2456.5	0.0284
2456	0.02946
2455.5	0.0336
2455	0.03644
2454.5	0.03785
2454	0.03856
2453.5	0.03855
2453	0.03501
2452.5	0.03021
2452	0.0296
2451.5	0.02958
2451	0.03087
2450.5	0.03382
2450	0.03496
2449.5	0.03432
2449	0.03408
2448.5	0.03078
2448	0.03012
2447.5	0.02959
2447	0.03082
2446.5	0.03585
2446	0.03777
2445.5	0.03949
2445	0.03798
2444.5	0.03924
2444	0.03646
2443.5	0.0349
2443	0.03413
2442.5	0.03448
2442	0.03628
2441.5	0.03862
2441	0.03668
2440.5	0.03529
2440	0.03358
2439.5	0.03142
2439	0.02725
2438.5	0.02782
2438	0.02592
2437.5	0.02605
2437	0.02982
2436.5	0.03117
2436	0.03209
2435.5	0.03206
2435	0.03082
2434.5	0.03078
2434	0.0288
2433.5	0.02651
2433	0.0232
2432.5	0.02432
2432	0.02515
2431.5	0.02622
2431	0.02504
2430.5	0.02441
2430	0.02454
2429.5	0.02453
2429	0.02292
2428.5	0.02204
2428	0.02137
2427.5	0.02244
2427	0.02259
2426.5	0.02106
2426	0.01998
2425.5	0.01882
2425	0.01868
2424.5	0.01924
2424	0.01848
2423.5	0.01809
2423	0.02123
2422.5	0.02184
2422	0.01997
2421.5	0.02034
2421	0.01979
2420.5	0.01974
2420	0.02118
2419.5	0.02187
2419	0.02348
2418.5	0.02473
2418	0.02562
2417.5	0.02768
2417	0.02535
2416.5	0.02474
2416	0.02303
2415.5	0.0209
2415	0.02151
2414.5	0.01955
2414	0.02092
2413.5	0.01815
2413	0.01956
2412.5	0.01889
2412	0.01803
2411.5	0.01664
2411	0.01589
2410.5	0.01399
2410	0.01292
2409.5	0.01285
2409	0.01402
2408.5	0.01461
2408	0.01808
2407.5	0.0189
2407	0.02045
2406.5	0.01964
2406	0.02005
2405.5	0.01902
2405	0.0201
2404.5	0.01788
2404	0.0179
2403.5	0.01783
2403	0.01849
2402.5	0.01928
2402	0.01941
2401.5	0.01767
2401	0.01792
2400.5	0.01853
2400	0.01914
2399.5	0.01977
2399	0.0185
2398.5	0.02158
2398	0.02348
2397.5	0.02291
2397	0.02328
2396.5	0.02265
2396	0.02267
2395.5	0.02341
2395	0.02328
2394.5	0.02297
2394	0.02264
2393.5	0.02384
2393	0.02458
2392.5	0.02413
2392	0.02396
2391.5	0.02531
2391	0.0257
2390.5	0.0251
2390	0.02513
2389.5	0.02691
2389	0.02639
2388.5	0.02677
2388	0.02663
2387.5	0.02929
2387	0.03008
2386.5	0.0294
2386	0.03274
2385.5	0.0326
2385	0.03298
2384.5	0.03163
2384	0.03095
2383.5	0.03251
2383	0.03139
2382.5	0.03201
2382	0.03122
2381.5	0.03253
2381	0.03296
2380.5	0.03276
2380	0.03455
2379.5	0.03419
2379	0.03659
2378.5	0.03652
2378	0.03721
2377.5	0.03821
2377	0.03735
2376.5	0.036
2376	0.03583
2375.5	0.03657
2375	0.03729
2374.5	0.03461
2374	0.03551
2373.5	0.03422
2373	0.03626
2372.5	0.03672
2372	0.03756
2371.5	0.03843
2371	0.03798
2370.5	0.03965
2370	0.04008
2369.5	0.04026
2369	0.04137
2368.5	0.04206
2368	0.04215
2367.5	0.04226
2367	0.04192
2366.5	0.0403
2366	0.04186
2365.5	0.04331
2365	0.04422
2364.5	0.04623
2364	0.04904
2363.5	0.04968
2363	0.05219
2362.5	0.05248
2362	0.05403
2361.5	0.05514
2361	0.05759
2360.5	0.05779
2360	0.05865
2359.5	0.05875
2359	0.05979
2358.5	0.05935
2358	0.05904
2357.5	0.05823
2357	0.05994
2356.5	0.0595
2356	0.0591
2355.5	0.05999
2355	0.06028
2354.5	0.06087
2354	0.06232
2353.5	0.06392
2353	0.06447
2352.5	0.0656
2352	0.06728
2351.5	0.06822
2351	0.07001
2350.5	0.07379
2350	0.07375
2349.5	0.07524
2349	0.07473
2348.5	0.0768
2348	0.07687
2347.5	0.07627
2347	0.0768
2346.5	0.07929
2346	0.07944
2345.5	0.07856
2345	0.08069
2344.5	0.08197
2344	0.08251
2343.5	0.08383
2343	0.08639
2342.5	0.08832
2342	0.08933
2341.5	0.0899
2341	0.08997
2340.5	0.09109
2340	0.09011
2339.5	0.09133
2339	0.09078
2338.5	0.09312
2338	0.09393
2337.5	0.09542
2337	0.09805
2336.5	0.09858
2336	0.09837
2335.5	0.09765
2335	0.09939
2334.5	0.10237
2334	0.10194
2333.5	0.10173
2333	0.10096
2332.5	0.10028
2332	0.09787
2331.5	0.09556
2331	0.09353
2330.5	0.09227
2330	0.0927
2329.5	0.09372
2329	0.09217
2328.5	0.09303
2328	0.09309
2327.5	0.09635
2327	0.0961
2326.5	0.09562
2326	0.09676
2325.5	0.09744
2325	0.09624
2324.5	0.09529
2324	0.09455
2323.5	0.09407
2323	0.09387
2322.5	0.09252
2322	0.0898
2321.5	0.0882
2321	0.08665
2320.5	0.0837
2320	0.08314
2319.5	0.08341
2319	0.08207
2318.5	0.08254
2318	0.08166
2317.5	0.0801
2317	0.08044
2316.5	0.07906
2316	0.07876
2315.5	0.078
2315	0.07862
2314.5	0.07549
2314	0.07541
2313.5	0.07604
2313	0.07531
2312.5	0.07466
2312	0.07417
2311.5	0.07457
2311	0.07359
2310.5	0.07274
2310	0.07303
2309.5	0.07202
2309	0.07069
2308.5	0.06957
2308	0.07038
2307.5	0.0701
2307	0.06893
2306.5	0.06658
2306	0.06586
2305.5	0.06485
2305	0.0637
2304.5	0.06208
2304	0.06036
2303.5	0.0575
2303	0.05706
2302.5	0.05742
2302	0.05624
2301.5	0.05403
2301	0.05183
2300.5	0.05308
2300	0.05148
2299.5	0.05016
2299	0.04999
2298.5	0.04878
2298	0.04838
2297.5	0.04678
2297	0.04641
2296.5	0.04653
2296	0.04656
2295.5	0.04659
2295	0.04744
2294.5	0.0467
2294	0.04644
2293.5	0.04589
2293	0.04439
2292.5	0.04316
2292	0.04328
2291.5	0.04401
2291	0.04342
2290.5	0.04276
2290	0.04153
2289.5	0.04023
2289	0.03844
2288.5	0.03883
2288	0.03673
2287.5	0.03473
2287	0.03482
2286.5	0.03418
2286	0.03388
2285.5	0.03419
2285	0.0328
2284.5	0.03246
2284	0.03155
2283.5	0.0313
2283	0.03041
2282.5	0.02994
2282	0.02951
2281.5	0.03078
2281	0.03019
2280.5	0.02965
2280	0.02944
2279.5	0.02748
2279	0.02742
2278.5	0.02734
2278	0.02673
2277.5	0.02601
2277	0.02618
2276.5	0.02543
2276	0.02533
2275.5	0.02525
2275	0.02428
2274.5	0.02465
2274	0.02495
2273.5	0.02459
2273	0.02463
2272.5	0.02372
2272	0.02301
2271.5	0.02307
2271	0.0226
2270.5	0.02211
2270	0.02328
2269.5	0.02382
2269	0.02381
2268.5	0.02332
2268	0.02284
2267.5	0.02209
2267	0.0227
2266.5	0.02132
2266	0.02091
2265.5	0.02107
2265	0.02193
2264.5	0.02183
2264	0.02112
2263.5	0.01996
2263	0.01933
2262.5	0.01902
2262	0.02026
2261.5	0.02009
2261	0.01985
2260.5	0.02067
2260	0.0207
2259.5	0.02093
2259	0.02011
2258.5	0.02075
2258	0.02097
2257.5	0.02157
2257	0.02081
2256.5	0.02054
2256	0.02043
2255.5	0.01887
2255	0.01898
2254.5	0.01882
2254	0.0185
2253.5	0.01884
2253	0.01917
2252.5	0.01899
2252	0.01895
2251.5	0.01884
2251	0.01825
2250.5	0.01714
2250	0.01797
2249.5	0.01707
2249	0.01679
2248.5	0.0167
2248	0.01749
2247.5	0.01739
2247	0.01701
2246.5	0.01611
2246	0.01668
2245.5	0.01635
2245	0.01586
2244.5	0.01591
2244	0.01659
2243.5	0.0168
2243	0.01738
2242.5	0.01733
2242	0.01702
2241.5	0.0166
2241	0.01687
2240.5	0.01729
2240	0.01678
2239.5	0.01662
2239	0.01691
2238.5	0.01626
2238	0.0163
2237.5	0.01616
2237	0.0161
2236.5	0.01529
2236	0.01597
2235.5	0.01535
2235	0.01645
2234.5	0.01568
2234	0.01612
2233.5	0.01742
2233	0.01764
2232.5	0.01866
2232	0.01968
2231.5	0.01963
2231	0.02035
2230.5	0.01996
2230	0.02066
2229.5	0.02048
2229	0.02015
2228.5	0.01985
2228	0.01996
2227.5	0.02003
2227	0.01889
2226.5	0.0195
2226	0.01922
2225.5	0.01955
2225	0.01916
2224.5	0.01957
2224	0.01988
2223.5	0.01994
2223	0.01959
2222.5	0.02012
2222	0.02062
2221.5	0.02105
2221	0.02166
2220.5	0.02137
2220	0.02071
2219.5	0.02047
2219	0.02099
2218.5	0.02164
2218	0.02114
2217.5	0.0213
2217	0.02236
2216.5	0.02312
2216	0.02262
2215.5	0.02265
2215	0.02315
2214.5	0.02252
2214	0.02332
2213.5	0.0239
2213	0.02443
2212.5	0.02496
2212	0.02456
2211.5	0.02504
2211	0.02578
2210.5	0.02438
2210	0.02445
2209.5	0.02406
2209	0.02467
2208.5	0.02459
2208	0.02571
2207.5	0.02588
2207	0.02621
2206.5	0.02677
2206	0.0275
2205.5	0.02753
2205	0.0275
2204.5	0.02844
2204	0.02914
2203.5	0.02924
2203	0.02904
2202.5	0.02814
2202	0.02815
2201.5	0.02729
2201	0.02768
2200.5	0.02828
2200	0.02816
2199.5	0.0279
2199	0.02819
2198.5	0.02767
2198	0.02719
2197.5	0.02696
2197	0.02694
2196.5	0.02666
2196	0.0278
2195.5	0.02781
2195	0.028
2194.5	0.0278
2194	0.02751
2193.5	0.0281
2193	0.02854
2192.5	0.02772
2192	0.02745
2191.5	0.02743
2191	0.02657
2190.5	0.02717
2190	0.02697
2189.5	0.02692
2189	0.0262
2188.5	0.02676
2188	0.02739
2187.5	0.02708
2187	0.02675
2186.5	0.02651
2186	0.02654
2185.5	0.02548
2185	0.02568
2184.5	0.02642
2184	0.02578
2183.5	0.02582
2183	0.02598
2182.5	0.02614
2182	0.02585
2181.5	0.02511
2181	0.02529
2180.5	0.02494
2180	0.0242
2179.5	0.02437
2179	0.02402
2178.5	0.02375
2178	0.02371
2177.5	0.02425
2177	0.02504
2176.5	0.02522
2176	0.02456
2175.5	0.02479
2175	0.02513
2174.5	0.0245
2174	0.02466
2173.5	0.02354
2173	0.02455
2172.5	0.02378
2172	0.02464
2171.5	0.02463
2171	0.02467
2170.5	0.02488
2170	0.02528
2169.5	0.02552
2169	0.02474
2168.5	0.02431
2168	0.02407
2167.5	0.02381
2167	0.02381
2166.5	0.02383
2166	0.02357
2165.5	0.02341
2165	0.02327
2164.5	0.02312
2164	0.02245
2163.5	0.02218
2163	0.02198
2162.5	0.02232
2162	0.02241
2161.5	0.02256
2161	0.02245
2160.5	0.02159
2160	0.02171
2159.5	0.02173
2159	0.02078
2158.5	0.02094
2158	0.02098
2157.5	0.02092
2157	0.02145
2156.5	0.0218
2156	0.02092
2155.5	0.02041
2155	0.01978
2154.5	0.02088
2154	0.02174
2153.5	0.02181
2153	0.02175
2152.5	0.02253
2152	0.02269
2151.5	0.02319
2151	0.02304
2150.5	0.02211
2150	0.02174
2149.5	0.02176
2149	0.02214
2148.5	0.02226
2148	0.0216
2147.5	0.021
2147	0.02085
2146.5	0.02062
2146	0.01991
2145.5	0.01931
2145	0.01833
2144.5	0.01904
2144	0.01988
2143.5	0.01959
2143	0.01955
2142.5	0.01954
2142	0.02012
2141.5	0.02001
2141	0.01875
2140.5	0.01902
2140	0.0192
2139.5	0.01998
2139	0.01992
2138.5	0.01937
2138	0.01896
2137.5	0.01966
2137	0.02004
2136.5	0.01968
2136	0.01976
2135.5	0.02042
2135	0.0213
2134.5	0.02178
2134	0.02159
2133.5	0.021
2133	0.02006
2132.5	0.01921
2132	0.01867
2131.5	0.01833
2131	0.01819
2130.5	0.0184
2130	0.01899
2129.5	0.01876
2129	0.01931
2128.5	0.01955
2128	0.0188
2127.5	0.01894
2127	0.01958
2126.5	0.01976
2126	0.01986
2125.5	0.01915
2125	0.01884
2124.5	0.01876
2124	0.01841
2123.5	0.01864
2123	0.01834
2122.5	0.01795
2122	0.01792
2121.5	0.01853
2121	0.01857
2120.5	0.01871
2120	0.01786
2119.5	0.01755
2119	0.01805
2118.5	0.01758
2118	0.01613
2117.5	0.01607
2117	0.01596
2116.5	0.01593
2116	0.01597
2115.5	0.01548
2115	0.01569
2114.5	0.01542
2114	0.01559
2113.5	0.01609
2113	0.01654
2112.5	0.01674
2112	0.01652
2111.5	0.01744
2111	0.01703
2110.5	0.01714
2110	0.01755
2109.5	0.01715
2109	0.01769
2108.5	0.01811
2108	0.01768
2107.5	0.01751
2107	0.01704
2106.5	0.01709
2106	0.01641
2105.5	0.01656
2105	0.01577
2104.5	0.01648
2104	0.0164
2103.5	0.01672
2103	0.01676
2102.5	0.01662
2102	0.01721
2101.5	0.01795
2101	0.0176
2100.5	0.01762
2100	0.01724
2099.5	0.01796
2099	0.018
2098.5	0.01827
2098	0.01893
2097.5	0.01832
2097	0.01799
2096.5	0.01794
2096	0.01715
2095.5	0.01736
2095	0.01701
2094.5	0.01674
2094	0.01641
2093.5	0.01744
2093	0.01878
2092.5	0.0191
2092	0.01948
2091.5	0.01891
2091	0.01869
2090.5	0.01842
2090	0.01749
2089.5	0.01765
2089	0.01783
2088.5	0.01768
2088	0.01806
2087.5	0.01923
2087	0.01849
2086.5	0.0185
2086	0.01822
2085.5	0.01839
2085	0.01811
2084.5	0.01822
2084	0.01791
2083.5	0.01926
2083	0.01916
2082.5	0.02013
2082	0.02012
2081.5	0.02056
2081	0.02083
2080.5	0.02089
2080	0.02074
2079.5	0.02085
2079	0.02136
2078.5	0.02158
2078	0.02244
2077.5	0.02235
2077	0.02301
2076.5	0.02314
2076	0.02428
2075.5	0.02447
2075	0.02402
2074.5	0.02482
2074	0.02554
2073.5	0.02648
2073	0.02754
2072.5	0.02655
2072	0.02725
2071.5	0.02731
2071	0.02722
2070.5	0.02718
2070	0.02765
2069.5	0.02844
2069	0.02973
2068.5	0.03102
2068	0.03148
2067.5	0.03232
2067	0.03213
2066.5	0.03309
2066	0.03312
2065.5	0.03395
2065	0.03527
2064.5	0.03636
2064	0.03751
2063.5	0.03837
2063	0.03849
2062.5	0.03892
2062	0.03922
2061.5	0.03973
2061	0.04085
2060.5	0.04098
2060	0.04142
2059.5	0.04201
2059	0.04269
2058.5	0.04343
2058	0.04479
2057.5	0.0462
2057	0.04746
2056.5	0.0493
2056	0.05027
2055.5	0.05154
2055	0.05176
2054.5	0.0532
2054	0.0539
2053.5	0.05472
2053	0.05521
2052.5	0.05664
2052	0.05687
2051.5	0.0583
2051	0.05942
2050.5	0.05968
2050	0.06139
2049.5	0.0613
2049	0.06212
2048.5	0.0638
2048	0.06319
2047.5	0.06403
2047	0.06441
2046.5	0.0649
2046	0.06439
2045.5	0.06531
2045	0.066
2044.5	0.06689
2044	0.06759
2043.5	0.06723
2043	0.06852
2042.5	0.06859
2042	0.06729
2041.5	0.06743
2041	0.06752
2040.5	0.06742
2040	0.06896
2039.5	0.06958
2039	0.06952
2038.5	0.06945
2038	0.06889
2037.5	0.06832
2037	0.06741
2036.5	0.06667
2036	0.0657
2035.5	0.06479
2035	0.0645
2034.5	0.06406
2034	0.06399
2033.5	0.06335
2033	0.06262
2032.5	0.0635
2032	0.06375
2031.5	0.06389
2031	0.06341
2030.5	0.06345
2030	0.0635
2029.5	0.06325
2029	0.06294
2028.5	0.06238
2028	0.06256
2027.5	0.06235
2027	0.0622
2026.5	0.06211
2026	0.06155
2025.5	0.06201
2025	0.06216
2024.5	0.06212
2024	0.06205
2023.5	0.06241
2023	0.06422
2022.5	0.06534
2022	0.06603
2021.5	0.06683
2021	0.06749
2020.5	0.06938
2020	0.07017
2019.5	0.07065
2019	0.07111
2018.5	0.07197
2018	0.07367
2017.5	0.07482
2017	0.07563
2016.5	0.07635
2016	0.07741
2015.5	0.07812
2015	0.0795
2014.5	0.08121
2014	0.08192
2013.5	0.08346
2013	0.08636
2012.5	0.08705
2012	0.08748
2011.5	0.08971
2011	0.09047
2010.5	0.09164
2010	0.09314
2009.5	0.09431
2009	0.09623
2008.5	0.09719
2008	0.09883
2007.5	0.09984
2007	0.10033
2006.5	0.10151
2006	0.10319
2005.5	0.10489
2005	0.10643
2004.5	0.10828
2004	0.11003
2003.5	0.11145
2003	0.11286
2002.5	0.11458
2002	0.11723
2001.5	0.11833
2001	0.11986
2000.5	0.12287
2000	0.12362
1999.5	0.12431
1999	0.12569
1998.5	0.12605
1998	0.12627
1997.5	0.12723
1997	0.12844
1996.5	0.12902
1996	0.12814
1995.5	0.12804
1995	0.12819
1994.5	0.12793
1994	0.12882
1993.5	0.12961
1993	0.13006
1992.5	0.13088
1992	0.12996
1991.5	0.13032
1991	0.13021
1990.5	0.12867
1990	0.12915
1989.5	0.12942
1989	0.1292
1988.5	0.13133
1988	0.13213
1987.5	0.13392
1987	0.13437
1986.5	0.13473
1986	0.13403
1985.5	0.13479
1985	0.13523
1984.5	0.13515
1984	0.13554
1983.5	0.13576
1983	0.13648
1982.5	0.13709
1982	0.1363
1981.5	0.13556
1981	0.13475
1980.5	0.13467
1980	0.13453
1979.5	0.13472
1979	0.13519
1978.5	0.1357
1978	0.13638
1977.5	0.137
1977	0.13799
1976.5	0.13769
1976	0.13815
1975.5	0.13811
1975	0.13793
1974.5	0.13847
1974	0.13781
1973.5	0.13853
1973	0.1378
1972.5	0.13757
1972	0.13639
1971.5	0.13697
1971	0.13711
1970.5	0.13665
1970	0.13692
1969.5	0.1372
1969	0.13841
1968.5	0.13667
1968	0.13535
1967.5	0.13592
1967	0.1351
1966.5	0.1336
1966	0.13361
1965.5	0.1332
1965	0.13216
1964.5	0.13266
1964	0.13062
1963.5	0.12817
1963	0.12678
1962.5	0.12379
1962	0.12225
1961.5	0.12069
1961	0.11902
1960.5	0.11855
1960	0.11804
1959.5	0.1175
1959	0.11577
1958.5	0.11439
1958	0.11221
1957.5	0.11043
1957	0.10962
1956.5	0.10748
1956	0.10552
1955.5	0.10327
1955	0.10098
1954.5	0.09805
1954	0.09567
1953.5	0.09383
1953	0.09111
1952.5	0.09048
1952	0.08736
1951.5	0.08503
1951	0.08462
1950.5	0.08235
1950	0.08097
1949.5	0.08069
1949	0.07862
1948.5	0.07676
1948	0.0757
1947.5	0.07417
1947	0.07266
1946.5	0.07078
1946	0.06838
1945.5	0.06827
1945	0.06883
1944.5	0.06612
1944	0.06364
1943.5	0.0619
1943	0.06025
1942.5	0.05935
1942	0.05843
1941.5	0.05838
1941	0.05781
1940.5	0.05724
1940	0.05546
1939.5	0.05567
1939	0.05439
1938.5	0.05317
1938	0.0534
1937.5	0.0525
1937	0.05073
1936.5	0.04909
1936	0.0474
1935.5	0.04715
1935	0.04619
1934.5	0.04564
1934	0.04428
1933.5	0.04422
1933	0.04288
1932.5	0.04162
1932	0.04019
1931.5	0.03894
1931	0.0386
1930.5	0.03904
1930	0.03885
1929.5	0.03876
1929	0.03745
1928.5	0.03637
1928	0.03515
1927.5	0.0351
1927	0.03474
1926.5	0.03484
1926	0.03435
1925.5	0.0346
1925	0.03339
1924.5	0.03246
1924	0.03054
1923.5	0.02881
1923	0.02844
1922.5	0.02769
1922	0.02584
1921.5	0.02589
1921	0.02466
1920.5	0.02424
1920	0.02358
1919.5	0.0235
1919	0.02306
1918.5	0.02387
1918	0.02434
1917.5	0.02397
1917	0.0237
1916.5	0.02254
1916	0.02254
1915.5	0.02279
1915	0.02273
1914.5	0.02302
1914	0.02279
1913.5	0.0229
1913	0.02226
1912.5	0.02177
1912	0.02166
1911.5	0.02101
1911	0.02017
1910.5	0.02062
1910	0.01971
1909.5	0.02003
1909	0.02049
1908.5	0.02063
1908	0.02056
1907.5	0.02045
1907	0.01984
1906.5	0.01969
1906	0.01975
1905.5	0.01955
1905	0.01929
1904.5	0.01907
1904	0.01916
1903.5	0.01999
1903	0.01958
1902.5	0.0185
1902	0.01855
1901.5	0.01824
1901	0.01844
1900.5	0.01732
1900	0.01885
1899.5	0.01778
1899	0.01759
1898.5	0.01754
1898	0.01685
1897.5	0.01731
1897	0.01757
1896.5	0.01698
1896	0.0165
1895.5	0.01646
1895	0.01642
1894.5	0.01594
1894	0.01568
1893.5	0.01571
1893	0.01548
1892.5	0.01548
1892	0.01452
1891.5	0.01448
1891	0.0144
1890.5	0.01427
1890	0.01317
1889.5	0.01305
1889	0.01262
1888.5	0.01235
1888	0.01222
1887.5	0.01222
1887	0.0122
1886.5	0.01238
1886	0.0123
1885.5	0.0118
1885	0.01148
1884.5	0.01118
1884	0.01101
1883.5	0.01105
1883	0.0113
1882.5	0.01103
1882	0.01075
1881.5	0.01074
1881	0.01014
1880.5	0.00996
1880	0.00958
1879.5	0.00953
1879	0.00901
1878.5	0.00834
1878	0.00801
1877.5	0.00798
1877	0.00744
1876.5	0.00718
1876	0.00711
1875.5	0.00725
1875	0.00703
1874.5	0.00703
1874	0.00667
1873.5	0.0068
1873	0.00659
1872.5	0.00716
1872	0.00726
1871.5	0.00754
1871	0.00734
1870.5	0.00757
1870	0.00749
1869.5	0.007
1869	0.00702
1868.5	0.00729
1868	0.00752
1867.5	0.00763
1867	0.00768
1866.5	0.0081
1866	0.00781
1865.5	0.00783
1865	0.00749
1864.5	0.00718
1864	0.00716
1863.5	0.00649
1863	0.0067
1862.5	0.00649
1862	0.00631
1861.5	0.00628
1861	0.00588
1860.5	0.00618
1860	0.00607
1859.5	0.00638
1859	0.0065
1858.5	0.00661
1858	0.00686
1857.5	0.00723
1857	0.00766
1856.5	0.00794
1856	0.00796
1855.5	0.00787
1855	0.00787
1854.5	0.00783
1854	0.00797
1853.5	0.00755
1853	0.00735
1852.5	0.00742
1852	0.00711
1851.5	0.00724
1851	0.00745
1850.5	0.00716
1850	0.00717
1849.5	0.00732
1849	0.00771
1848.5	0.00821
1848	0.0083
1847.5	0.00828
1847	0.00858
1846.5	0.00885
1846	0.00918
1845.5	0.00936
1845	0.00978
1844.5	0.00968
1844	0.01014
1843.5	0.01052
1843	0.01066
1842.5	0.01061
1842	0.01058
1841.5	0.01042
1841	0.01056
1840.5	0.01049
1840	0.01074
1839.5	0.01081
1839	0.01101
1838.5	0.01076
1838	0.01095
1837.5	0.01126
1837	0.01124
1836.5	0.01143
1836	0.01146
1835.5	0.01171
1835	0.01165
1834.5	0.01188
1834	0.01212
1833.5	0.01208
1833	0.01221
1832.5	0.01247
1832	0.01249
1831.5	0.01289
1831	0.013
1830.5	0.01318
1830	0.0131
1829.5	0.01294
1829	0.013
1828.5	0.01315
1828	0.01305
1827.5	0.01318
1827	0.01376
1826.5	0.01366
1826	0.01382
1825.5	0.01432
1825	0.01428
1824.5	0.01432
1824	0.01433
1823.5	0.01469
1823	0.01486
1822.5	0.01511
1822	0.01527
1821.5	0.01524
1821	0.01537
1820.5	0.01527
1820	0.01562
1819.5	0.01569
1819	0.01526
1818.5	0.01549
1818	0.01545
1817.5	0.01585
1817	0.01564
1816.5	0.01572
1816	0.01567
1815.5	0.01553
1815	0.01577
1814.5	0.01558
1814	0.01583
1813.5	0.01599
1813	0.01609
1812.5	0.01626
1812	0.01648
1811.5	0.01646
1811	0.01616
1810.5	0.01575
1810	0.01556
1809.5	0.01579
1809	0.01592
1808.5	0.01585
1808	0.01576
1807.5	0.0158
1807	0.01564
1806.5	0.01592
1806	0.01568
1805.5	0.01579
1805	0.01571
1804.5	0.01595
1804	0.01624
1803.5	0.01613
1803	0.01621
1802.5	0.01642
1802	0.01618
1801.5	0.01594
1801	0.01585
1800.5	0.0158
1800	0.01583
1799.5	0.01562
1799	0.01535
1798.5	0.01561
1798	0.01552
1797.5	0.01562
1797	0.01562
1796.5	0.01572
1796	0.01566
1795.5	0.01561
1795	0.01583
1794.5	0.01586
1794	0.01578
1793.5	0.01538
1793	0.01535
1792.5	0.01533
1792	0.0154
1791.5	0.01539
1791	0.01523
1790.5	0.01539
1790	0.01502
1789.5	0.01508
1789	0.01531
1788.5	0.01512
1788	0.01518
1787.5	0.01528
1787	0.01543
1786.5	0.01524
1786	0.01529
1785.5	0.01536
1785	0.01528
1784.5	0.01533
1784	0.01532
1783.5	0.01551
1783	0.01537
1782.5	0.01501
1782	0.01501
1781.5	0.01471
1781	0.01452
1780.5	0.01464
1780	0.01463
1779.5	0.01421
1779	0.01397
1778.5	0.0137
1778	0.01351
1777.5	0.01337
1777	0.01331
1776.5	0.01324
1776	0.01322
1775.5	0.01353
1775	0.0135
1774.5	0.01383
1774	0.01361
1773.5	0.01353
1773	0.01355
1772.5	0.01352
1772	0.01338
1771.5	0.01319
1771	0.01301
1770.5	0.01277
1770	0.01284
1769.5	0.01302
1769	0.0125
1768.5	0.01256
1768	0.01262
1767.5	0.01271
1767	0.01268
1766.5	0.01263
1766	0.01258
1765.5	0.01265
1765	0.01273
1764.5	0.01282
1764	0.01288
1763.5	0.01286
1763	0.01305
1762.5	0.01323
1762	0.01338
1761.5	0.01322
1761	0.01321
1760.5	0.01326
1760	0.01316
1759.5	0.01328
1759	0.0132
1758.5	0.01308
1758	0.01312
1757.5	0.01316
1757	0.01314
1756.5	0.01294
1756	0.013
1755.5	0.013
1755	0.01338
1754.5	0.01335
1754	0.01344
1753.5	0.01327
1753	0.01358
1752.5	0.0136
1752	0.01344
1751.5	0.01351
1751	0.01369
1750.5	0.01371
1750	0.01384
1749.5	0.01377
1749	0.01397
1748.5	0.01374
1748	0.0136
1747.5	0.01367
1747	0.01376
1746.5	0.01387
1746	0.01393
1745.5	0.0141
1745	0.01447
1744.5	0.01432
1744	0.01451
1743.5	0.01435
1743	0.01422
1742.5	0.01414
1742	0.01432
1741.5	0.01442
1741	0.01438
1740.5	0.01443
1740	0.01449
1739.5	0.01465
1739	0.0146
1738.5	0.01463
1738	0.01462
1737.5	0.01451
1737	0.0146
1736.5	0.01467
1736	0.0147
1735.5	0.01455
1735	0.01471
1734.5	0.01466
1734	0.01473
1733.5	0.01489
1733	0.01515
1732.5	0.01539
1732	0.01534
1731.5	0.01539
1731	0.01566
1730.5	0.01571
1730	0.01557
1729.5	0.01568
1729	0.0158
1728.5	0.01578
1728	0.0157
1727.5	0.01565
1727	0.0157
1726.5	0.01558
1726	0.01564
1725.5	0.01559
1725	0.01575
1724.5	0.01584
1724	0.01581
1723.5	0.0161
1723	0.01605
1722.5	0.016
1722	0.01621
1721.5	0.01655
1721	0.01651
1720.5	0.01642
1720	0.01618
1719.5	0.01639
1719	0.01652
1718.5	0.01644
1718	0.01636
1717.5	0.0166
1717	0.01654
1716.5	0.01668
1716	0.01683
1715.5	0.0168
1715	0.01673
1714.5	0.0167
1714	0.01674
1713.5	0.017
1713	0.01704
1712.5	0.01711
1712	0.01699
1711.5	0.01678
1711	0.01684
1710.5	0.01709
1710	0.01724
1709.5	0.01725
1709	0.01727
1708.5	0.01708
1708	0.01693
1707.5	0.01713
1707	0.01709
1706.5	0.01687
1706	0.01667
1705.5	0.01693
1705	0.01715
1704.5	0.01717
1704	0.01721
1703.5	0.01751
1703	0.01778
1702.5	0.01771
1702	0.01797
1701.5	0.01803
1701	0.01768
1700.5	0.01739
1700	0.01753
1699.5	0.01724
1699	0.01694
1698.5	0.01698
1698	0.01692
1697.5	0.01637
1697	0.01641
1696.5	0.0167
1696	0.01688
1695.5	0.01716
1695	0.01704
1694.5	0.01768
1694	0.01749
1693.5	0.01704
1693	0.01682
1692.5	0.0174
1692	0.01733
1691.5	0.01707
1691	0.01819
1690.5	0.01866
1690	0.01883
1689.5	0.01949
1689	0.01949
1688.5	0.02023
1688	0.02
1687.5	0.02071
1687	0.02096
1686.5	0.02086
1686	0.02068
1685.5	0.02113
1685	0.02172
1684.5	0.02208
1684	0.02182
1683.5	0.02232
1683	0.02303
1682.5	0.02339
1682	0.02359
1681.5	0.02453
1681	0.02527
1680.5	0.02586
1680	0.02608
1679.5	0.02623
1679	0.02645
1678.5	0.02649
1678	0.02664
1677.5	0.0272
1677	0.02772
1676.5	0.02768
1676	0.02799
1675.5	0.02853
1675	0.02805
1674.5	0.02844
1674	0.02841
1673.5	0.02951
1673	0.03003
1672.5	0.03009
1672	0.03051
1671.5	0.0303
1671	0.03025
1670.5	0.03066
1670	0.03095
1669.5	0.03103
1669	0.03088
1668.5	0.03095
1668	0.0314
1667.5	0.03233
1667	0.03283
1666.5	0.03361
1666	0.03408
1665.5	0.03418
1665	0.03492
1664.5	0.03545
1664	0.03548
1663.5	0.03571
1663	0.03642
1662.5	0.0365
1662	0.03791
1661.5	0.0382
1661	0.03852
1660.5	0.03882
1660	0.0392
1659.5	0.03991
1659	0.04088
1658.5	0.04098
1658	0.04206
1657.5	0.04261
1657	0.04299
1656.5	0.04422
1656	0.04493
1655.5	0.04513
1655	0.04589
1654.5	0.04626
1654	0.04687
1653.5	0.04733
1653	0.04783
1652.5	0.04832
1652	0.04841
1651.5	0.04924
1651	0.05015
1650.5	0.05148
1650	0.05224
1649.5	0.05321
1649	0.05428
1648.5	0.05456
1648	0.05528
1647.5	0.05605
1647	0.05702
1646.5	0.0575
1646	0.05852
1645.5	0.05983
1645	0.06037
1644.5	0.06173
1644	0.06138
1643.5	0.0619
1643	0.06268
1642.5	0.06298
1642	0.06401
1641.5	0.06562
1641	0.06694
1640.5	0.06804
1640	0.06928
1639.5	0.07002
1639	0.07125
1638.5	0.07195
1638	0.07251
1637.5	0.07347
1637	0.07461
1636.5	0.07623
1636	0.07821
1635.5	0.07932
1635	0.08041
1634.5	0.08189
1634	0.08322
1633.5	0.08516
1633	0.08668
1632.5	0.08832
1632	0.08939
1631.5	0.09122
1631	0.0925
1630.5	0.09361
1630	0.09458
1629.5	0.09527
1629	0.0976
1628.5	0.09877
1628	0.10001
1627.5	0.10131
1627	0.10261
1626.5	0.10338
1626	0.10486
1625.5	0.10589
1625	0.10724
1624.5	0.10803
1624	0.10996
1623.5	0.11109
1623	0.11222
1622.5	0.11279
1622	0.11387
1621.5	0.11466
1621	0.11469
1620.5	0.11536
1620	0.11556
1619.5	0.11582
1619	0.11596
1618.5	0.11601
1618	0.11674
1617.5	0.11672
1617	0.11696
1616.5	0.11673
1616	0.1175
1615.5	0.11763
1615	0.11732
1614.5	0.11771
1614	0.11736
1613.5	0.11762
1613	0.11749
1612.5	0.11745
1612	0.11763
1611.5	0.11719
1611	0.11724
1610.5	0.11765
1610	0.1172
1609.5	0.11779
1609	0.11801
1608.5	0.11836
1608	0.11774
1607.5	0.11827
1607	0.1176
1606.5	0.11745
1606	0.11698
1605.5	0.11691
1605	0.11591
1604.5	0.11503
1604	0.11432
1603.5	0.11304
1603	0.11162
1602.5	0.11019
1602	0.10955
1601.5	0.10886
1601	0.10736
1600.5	0.10619
1600	0.10522
1599.5	0.10332
1599	0.10245
1598.5	0.10121
1598	0.09938
1597.5	0.09787
1597	0.0978
1596.5	0.09738
1596	0.09599
1595.5	0.09451
1595	0.09329
1594.5	0.09249
1594	0.09133
1593.5	0.09029
1593	0.0892
1592.5	0.08781
1592	0.08712
1591.5	0.08585
1591	0.08551
1590.5	0.0843
1590	0.08264
1589.5	0.08167
1589	0.08044
1588.5	0.07953
1588	0.07844
1587.5	0.07724
1587	0.07622
1586.5	0.07447
1586	0.07248
1585.5	0.07121
1585	0.06966
1584.5	0.06853
1584	0.06795
1583.5	0.06762
1583	0.06691
1582.5	0.06721
1582	0.06692
1581.5	0.06647
1581	0.06634
1580.5	0.06633
1580	0.06732
1579.5	0.06834
1579	0.06872
1578.5	0.06997
1578	0.07145
1577.5	0.07357
1577	0.07543
1576.5	0.07761
1576	0.08019
1575.5	0.08328
1575	0.08608
1574.5	0.08923
1574	0.09207
1573.5	0.09489
1573	0.0982
1572.5	0.10184
1572	0.10574
1571.5	0.10947
1571	0.1132
1570.5	0.11754
1570	0.12073
1569.5	0.12383
1569	0.12665
1568.5	0.12893
1568	0.13091
1567.5	0.13227
1567	0.13431
1566.5	0.13592
1566	0.13723
1565.5	0.1381
1565	0.13786
1564.5	0.13741
1564	0.13659
1563.5	0.13501
1563	0.13314
1562.5	0.13084
1562	0.12901
1561.5	0.127
1561	0.12482
1560.5	0.12286
1560	0.12051
1559.5	0.11815
1559	0.11603
1558.5	0.11373
1558	0.11117
1557.5	0.10952
1557	0.10691
1556.5	0.10478
1556	0.10366
1555.5	0.10156
1555	0.09973
1554.5	0.09767
1554	0.09508
1553.5	0.09284
1553	0.09067
1552.5	0.08804
1552	0.0854
1551.5	0.08286
1551	0.08027
1550.5	0.07817
1550	0.07591
1549.5	0.07336
1549	0.07122
1548.5	0.06905
1548	0.06698
1547.5	0.06483
1547	0.06304
1546.5	0.06098
1546	0.05908
1545.5	0.05766
1545	0.05606
1544.5	0.05521
1544	0.05393
1543.5	0.05185
1543	0.05076
1542.5	0.04975
1542	0.04798
1541.5	0.0468
1541	0.04551
1540.5	0.04422
1540	0.04355
1539.5	0.04238
1539	0.04105
1538.5	0.04021
1538	0.03864
1537.5	0.03752
1537	0.03652
1536.5	0.03558
1536	0.03472
1535.5	0.03404
1535	0.03381
1534.5	0.03349
1534	0.03314
1533.5	0.03276
1533	0.03283
1532.5	0.03224
1532	0.0316
1531.5	0.03143
1531	0.03065
1530.5	0.03066
1530	0.03028
1529.5	0.03022
1529	0.03015
1528.5	0.02943
1528	0.02906
1527.5	0.02901
1527	0.02863
1526.5	0.02827
1526	0.02803
1525.5	0.02814
1525	0.02851
1524.5	0.02887
1524	0.02865
1523.5	0.02837
1523	0.029
1522.5	0.02911
1522	0.02942
1521.5	0.03024
1521	0.03018
1520.5	0.03104
1520	0.03202
1519.5	0.03279
1519	0.03342
1518.5	0.03322
1518	0.03352
1517.5	0.03433
1517	0.0348
1516.5	0.03529
1516	0.03591
1515.5	0.03703
1515	0.03772
1514.5	0.0385
1514	0.03892
1513.5	0.03911
1513	0.03925
1512.5	0.03947
1512	0.03966
1511.5	0.04004
1511	0.03983
1510.5	0.04039
1510	0.04056
1509.5	0.04077
1509	0.0412
1508.5	0.0412
1508	0.04159
1507.5	0.04189
1507	0.04164
1506.5	0.04186
1506	0.04204
1505.5	0.04263
1505	0.04264
1504.5	0.04288
1504	0.04336
1503.5	0.04355
1503	0.04391
1502.5	0.04391
1502	0.0443
1501.5	0.04524
1501	0.04554
1500.5	0.04672
[truncated: 2,601 more rows]

## Sheet: NdF3
2650	0.04857		NdF3
2649.5	0.01711
2649	0.05462
2648.5	0.08215
2648	0.19217
2647.5	0.0775
2647	0.13532
2646.5	0.04042
2646	0.00622
2645.5	0.16901
2645	0.02392
2644.5	0.12786
2644	0.00432
2643.5	0.10927
2643	0.08309
2642.5	0.05925
2642	0.01035
2641.5	-0.08163
2641	-0.08677
2640.5	-0.05217
2640	0.03714
2639.5	0.09497
2639	0.07063
2638.5	0.07553
2638	0.12365
2637.5	0.07181
2637	0.13116
2636.5	0.14914
2636	0.21365
2635.5	0.16287
2635	0.06737
2634.5	0.00476
2634	0.15885
2633.5	0.25264
2633	0.13815
2632.5	0.01847
2632	-0.09704
2631.5	-0.0397
2631	0.03714
2630.5	0.29843
2630	0.03641
2629.5	0.1957
2629	0.22885
2628.5	0.2692
2628	0.33805
2627.5	0.27294
2627	-0.05131
2626.5	-0.04396
2626	-0.01044
2625.5	0.11517
2625	0.07912
2624.5	0.0185
2624	0.02179
2623.5	0.1156
2623	-0.02771
2622.5	-0.024
2622	-0.0365
2621.5	0.07982
2621	0.03278
2620.5	0.05875
2620	0.15592
2619.5	0.11261
2619	0.00439
2618.5	0.00419
2618	0.17217
2617.5	0.10407
2617	0.02193
2616.5	-0.08985
2616	0.08039
2615.5	0.08152
2615	0.20281
2614.5	0.09404
2614	0.07247
2613.5	0.05416
2613	0.18351
2612.5	0.32398
2612	0.21051
2611.5	0.16314
2611	0.00457
2610.5	-0.01494
2610	-0.02589
2609.5	0.04163
2609	0.14878
2608.5	0.14871
2608	0.08999
2607.5	0.07056
2607	0.08011
2606.5	0.06211
2606	0.09518
2605.5	0.03114
2605	-0.01568
2604.5	-0.02595
2604	0.00647
2603.5	0.01386
2603	0.07556
2602.5	-0.07558
2602	0.01798
2601.5	0.12195
2601	0.14866
2600.5	0.15837
2600	-0.04061
2599.5	0.0673
2599	0.28395
2598.5	0.48031
2598	0.37147
2597.5	0.34325
2597	0.26547
2596.5	0.1973
2596	0.12623
2595.5	0.01434
2595	0.19528
2594.5	0.10676
2594	0.11579
2593.5	0.28871
2593	0.39525
2592.5	0.50768
2592	0.66573
2591.5	0.51858
2591	0.46635
2590.5	0.29946
2590	0.23419
2589.5	0.2697
2589	0.15108
2588.5	0.1824
2588	0.23223
2587.5	0.29313
2587	0.20472
2586.5	0.34452
2586	0.33296
2585.5	0.46782
2585	0.21919
2584.5	0.16031
2584	0.08481
2583.5	0.32172
2583	0.14341
2582.5	0.13037
2582	0.08591
2581.5	0.07578
2581	0.20874
2580.5	0.40435
2580	0.37724
2579.5	0.52334
2579	0.39053
2578.5	0.39398
2578	0.25565
2577.5	0.18983
2577	0.20234
2576.5	0.11919
2576	0.26039
2575.5	0.26852
2575	0.39875
2574.5	0.28171
2574	0.34052
2573.5	0.34945
2573	0.32133
2572.5	0.33065
2572	0.19658
2571.5	0.06277
2571	0.18712
2570.5	0.09898
2570	0.13047
2569.5	0.1196
2569	0.38612
2568.5	0.62415
2568	0.61487
2567.5	0.3904
2567	0.33914
2566.5	0.32829
2566	0.35866
2565.5	0.38782
2565	0.27953
2564.5	0.18071
2564	0.26551
2563.5	0.14124
2563	0.25096
2562.5	0.24022
2562	0.33542
2561.5	0.37311
2561	0.55559
2560.5	0.50565
2560	0.78922
2559.5	0.43007
2559	0.60544
2558.5	0.30036
2558	0.17275
2557.5	0.24585
2557	0.43027
2556.5	0.66253
2556	0.6735
2555.5	0.52117
2555	0.38367
2554.5	0.42899
2554	0.39155
2553.5	0.56014
2553	0.59046
2552.5	0.60837
2552	0.37154
2551.5	0.41539
2551	0.42327
2550.5	0.52653
2550	0.28995
2549.5	0.34154
2549	0.35696
2548.5	0.49278
2548	0.4944
2547.5	0.41165
2547	0.58615
2546.5	0.66015
2546	0.49214
2545.5	0.4265
2545	0.46821
2544.5	0.59941
2544	0.62941
2543.5	0.63879
2543	0.44803
2542.5	0.40449
2542	0.51787
2541.5	0.51961
2541	0.51857
2540.5	0.49589
2540	0.53579
2539.5	0.49967
2539	0.40208
2538.5	0.35625
2538	0.3897
2537.5	0.50395
2537	0.66644
2536.5	0.49356
2536	0.3893
2535.5	0.47343
2535	0.59849
2534.5	0.69349
2534	0.52833
2533.5	0.49639
2533	0.54331
2532.5	0.50003
2532	0.61524
2531.5	0.40368
2531	0.5456
2530.5	0.53881
2530	0.7566
2529.5	0.49656
2529	0.30731
2528.5	0.2161
2528	0.23152
2527.5	0.26536
2527	0.25831
2526.5	0.44116
2526	0.5165
2525.5	0.77927
2525	0.5352
2524.5	0.49459
2524	0.49343
2523.5	0.31038
2523	0.37146
2522.5	0.35734
2522	0.54735
2521.5	0.44078
2521	0.47768
2520.5	0.49462
2520	0.40575
2519.5	0.45962
2519	0.37807
2518.5	0.51803
2518	0.43454
2517.5	0.48771
2517	0.4405
2516.5	0.56756
2516	0.49767
2515.5	0.63006
2515	0.416
2514.5	0.44825
2514	0.33249
2513.5	0.41686
2513	0.35377
2512.5	0.42914
2512	0.37952
2511.5	0.55992
2511	0.52417
2510.5	0.54996
2510	0.39325
2509.5	0.3919
2509	0.43174
2508.5	0.43945
2508	0.55198
2507.5	0.4597
2507	0.56939
2506.5	0.44254
2506	0.45765
2505.5	0.45903
2505	0.45411
2504.5	0.5623
2504	0.5102
2503.5	0.52453
2503	0.42481
2502.5	0.47051
2502	0.43487
2501.5	0.50101
2501	0.52335
2500.5	0.45669
2500	0.34688
2499.5	0.28894
2499	0.3488
2498.5	0.2965
2498	0.2859
2497.5	0.3081
2497	0.34577
2496.5	0.40983
2496	0.4741
2495.5	0.48127
2495	0.38991
2494.5	0.39788
2494	0.39053
2493.5	0.58928
2493	0.47224
2492.5	0.53043
2492	0.54611
2491.5	0.4621
2491	0.49929
2490.5	0.39999
2490	0.34988
2489.5	0.39651
2489	0.33128
2488.5	0.31754
2488	0.28318
2487.5	0.36078
2487	0.33707
2486.5	0.34996
2486	0.39915
2485.5	0.37489
2485	0.28803
2484.5	0.25772
2484	0.22337
2483.5	0.2305
2483	0.31709
2482.5	0.30371
2482	0.3578
2481.5	0.33137
2481	0.33467
2480.5	0.43696
2480	0.41391
2479.5	0.41076
2479	0.39637
2478.5	0.35028
2478	0.26327
2477.5	0.28593
2477	0.24131
2476.5	0.35967
2476	0.43347
2475.5	0.38175
2475	0.38277
2474.5	0.27745
2474	0.34485
2473.5	0.29529
2473	0.35362
2472.5	0.28443
2472	0.28383
2471.5	0.21367
2471	0.22069
2470.5	0.2266
2470	0.35198
2469.5	0.40637
2469	0.55596
2468.5	0.48923
2468	0.36543
2467.5	0.33469
2467	0.28099
2466.5	0.28565
2466	0.36173
2465.5	0.4043
2465	0.43076
2464.5	0.46762
2464	0.3696
2463.5	0.35657
2463	0.2859
2462.5	0.31881
2462	0.30941
2461.5	0.39751
2461	0.3199
2460.5	0.32024
2460	0.24388
2459.5	0.36422
2459	0.47911
2458.5	0.41248
2458	0.39073
2457.5	0.30604
2457	0.34249
2456.5	0.39247
2456	0.33638
2455.5	0.27922
2455	0.19164
2454.5	0.22639
2454	0.22971
2453.5	0.28633
2453	0.31363
2452.5	0.37954
2452	0.31939
2451.5	0.23456
2451	0.26581
2450.5	0.31783
2450	0.39254
2449.5	0.33648
2449	0.31995
2448.5	0.36454
2448	0.42357
2447.5	0.33532
2447	0.29827
2446.5	0.29839
2446	0.25835
2445.5	0.28809
2445	0.29359
2444.5	0.3121
2444	0.41248
2443.5	0.33642
2443	0.331
2442.5	0.30827
2442	0.32012
2441.5	0.36709
2441	0.33797
2440.5	0.30793
2440	0.3475
2439.5	0.3346
2439	0.37139
2438.5	0.29425
2438	0.23396
2437.5	0.28911
2437	0.22971
2436.5	0.30271
2436	0.3115
2435.5	0.36553
2435	0.38252
2434.5	0.33205
2434	0.31865
2433.5	0.27228
2433	0.21283
2432.5	0.1765
2432	0.15964
2431.5	0.17365
2431	0.15952
2430.5	0.19992
2430	0.21441
2429.5	0.23965
2429	0.22016
2428.5	0.21636
2428	0.24231
2427.5	0.28946
2427	0.28224
2426.5	0.25088
2426	0.25999
2425.5	0.2354
2425	0.31001
2424.5	0.2887
2424	0.27121
2423.5	0.29331
2423	0.33025
2422.5	0.32951
2422	0.29622
2421.5	0.23214
2421	0.19407
2420.5	0.2188
2420	0.24276
2419.5	0.19295
2419	0.25765
2418.5	0.24784
2418	0.24149
2417.5	0.1923
2417	0.18479
2416.5	0.17771
2416	0.1775
2415.5	0.17192
2415	0.21485
2414.5	0.23779
2414	0.24754
2413.5	0.21294
2413	0.19248
2412.5	0.20446
2412	0.18781
2411.5	0.2279
2411	0.23646
2410.5	0.26347
2410	0.21503
2409.5	0.20893
2409	0.17055
2408.5	0.20002
2408	0.15364
2407.5	0.14122
2407	0.12252
2406.5	0.14385
2406	0.1746
2405.5	0.15141
2405	0.14382
2404.5	0.1515
2404	0.1614
2403.5	0.16909
2403	0.16834
2402.5	0.19103
2402	0.17593
2401.5	0.20927
2401	0.22383
2400.5	0.22653
2400	0.22473
2399.5	0.2127
2399	0.23219
2398.5	0.20635
2398	0.20285
2397.5	0.17255
2397	0.20466
2396.5	0.18228
2396	0.16188
2395.5	0.1311
2395	0.12691
2394.5	0.18609
2394	0.14827
2393.5	0.16989
2393	0.16653
2392.5	0.13844
2392	0.19493
2391.5	0.15723
2391	0.20131
2390.5	0.18361
2390	0.216
2389.5	0.16913
2389	0.14645
2388.5	0.07124
2388	0.08399
2387.5	0.09709
2387	0.17027
2386.5	0.18378
2386	0.20024
2385.5	0.16857
2385	0.14493
2384.5	0.14976
2384	0.12666
2383.5	0.13835
2383	0.13991
2382.5	0.14889
2382	0.14394
2381.5	0.17344
2381	0.18589
2380.5	0.17774
2380	0.15369
2379.5	0.12619
2379	0.15669
2378.5	0.15023
2378	0.15183
2377.5	0.14442
2377	0.10011
2376.5	0.10103
2376	0.07327
2375.5	0.08833
2375	0.10887
2374.5	0.14432
2374	0.15678
2373.5	0.12505
2373	0.11717
2372.5	0.11095
2372	0.08744
2371.5	0.10002
2371	0.12614
2370.5	0.13834
2370	0.14877
2369.5	0.16184
2369	0.14202
2368.5	0.14357
2368	0.10278
2367.5	0.11443
2367	0.12831
2366.5	0.14273
2366	0.12929
2365.5	0.12551
2365	0.10871
2364.5	0.10929
2364	0.1055
2363.5	0.08633
2363	0.0825
2362.5	0.08575
2362	0.10068
2361.5	0.09151
2361	0.09199
2360.5	0.07002
2360	0.07572
2359.5	0.08313
2359	0.10871
2358.5	0.13067
2358	0.12995
2357.5	0.13031
2357	0.12785
2356.5	0.11758
2356	0.09142
2355.5	0.10259
2355	0.10444
2354.5	0.11669
2354	0.13245
2353.5	0.10489
2353	0.13008
2352.5	0.10217
2352	0.11714
2351.5	0.12485
2351	0.11456
2350.5	0.11293
2350	0.12106
2349.5	0.08891
2349	0.09575
2348.5	0.10934
2348	0.08199
2347.5	0.06144
2347	0.06353
2346.5	0.07095
2346	0.10042
2345.5	0.09391
2345	0.08229
2344.5	0.06742
2344	0.05497
2343.5	0.09224
2343	0.1305
2342.5	0.12079
2342	0.10196
2341.5	0.08579
2341	0.08726
2340.5	0.09325
2340	0.07199
2339.5	0.0723
2339	0.05727
2338.5	0.08439
2338	0.08436
2337.5	0.07181
2337	0.06998
2336.5	0.07563
2336	0.07118
2335.5	0.08488
2335	0.09789
2334.5	0.0863
2334	0.08256
2333.5	0.06606
2333	0.05723
2332.5	0.05361
2332	0.06672
2331.5	0.07942
2331	0.05483
2330.5	0.04709
2330	0.05291
2329.5	0.06885
2329	0.1012
2328.5	0.09348
2328	0.08428
2327.5	0.06824
2327	0.0662
2326.5	0.06947
2326	0.04789
2325.5	0.03467
2325	0.03322
2324.5	0.04829
2324	0.08044
2323.5	0.09395
2323	0.07973
2322.5	0.08937
2322	0.06421
2321.5	0.04028
2321	0.03552
2320.5	0
2320	0.0187
2319.5	0.0309
2319	0.06774
2318.5	0.09225
2318	0.08421
2317.5	0.07593
2317	0.06071
2316.5	0.0756
2316	0.03925
2315.5	0.04549
2315	0.01928
2314.5	0.042
2314	0.04603
2313.5	0.04523
2313	0.06139
2312.5	0.04492
2312	0.03968
2311.5	0.03985
2311	0.04257
2310.5	0.06214
2310	0.03794
2309.5	0.03288
2309	0.02419
2308.5	0.05268
2308	0.05188
2307.5	0.04388
2307	0.0182
2306.5	0.02337
2306	0.02358
2305.5	0.02814
2305	0.02234
2304.5	0.02552
2304	0.03637
2303.5	0.03665
2303	0.02252
2302.5	0.02818
2302	0.02537
2301.5	0.02398
2301	0.0231
2300.5	0.02964
2300	0.05141
2299.5	0.06243
2299	0.05646
2298.5	0.06918
2298	0.04164
2297.5	0.04466
2297	0.0302
2296.5	0.0542
2296	0.02417
2295.5	0.03703
2295	0.02795
2294.5	0.06024
2294	0.06316
2293.5	0.05906
2293	0.05236
2292.5	0.04488
2292	0.02901
2291.5	0.04163
2291	0.04244
2290.5	0.05461
2290	0.04827
2289.5	0.03148
2289	0.02571
2288.5	0.01963
2288	0.03646
2287.5	0.04537
2287	0.04393
2286.5	0.04796
2286	0.01935
2285.5	0.02807
2285	0.01636
2284.5	0.02328
2284	0.03908
2283.5	0.04765
2283	0.051
2282.5	0.04457
2282	0.05701
2281.5	0.03428
2281	0.02131
2280.5	0.01503
2280	0.02712
2279.5	0.03702
2279	0.02725
2278.5	0.04204
2278	0.03084
2277.5	0.04903
2277	0.02893
2276.5	0.03338
2276	0.05255
2275.5	0.07236
2275	0.07133
2274.5	0.0784
2274	0.06103
2273.5	0.06112
2273	0.05662
2272.5	0.04844
2272	0.03537
2271.5	0.03161
2271	0.0166
2270.5	0.01249
2270	0.03263
2269.5	0.04219
2269	0.04891
2268.5	0.05226
2268	0.05016
2267.5	0.06212
2267	0.04099
2266.5	0.02596
2266	0.01398
2265.5	0.02433
2265	0.04141
2264.5	0.04305
2264	0.05644
2263.5	0.04497
2263	0.04973
2262.5	0.03389
2262	0.03344
2261.5	0.03037
2261	0.03889
2260.5	0.03441
2260	0.03687
2259.5	0.04933
2259	0.05986
2258.5	0.06263
2258	0.05917
2257.5	0.04705
2257	0.04848
2256.5	0.03563
2256	0.03752
2255.5	0.0284
2255	0.02581
2254.5	0.03312
2254	0.03885
2253.5	0.05123
2253	0.0554
2252.5	0.05545
2252	0.05836
2251.5	0.05548
2251	0.04771
2250.5	0.06033
2250	0.04783
2249.5	0.05264
2249	0.05027
2248.5	0.03591
2248	0.03969
2247.5	0.04935
2247	0.0457
2246.5	0.04758
2246	0.03268
2245.5	0.04088
2245	0.03765
2244.5	0.03223
2244	0.03294
2243.5	0.03148
2243	0.03329
2242.5	0.03351
2242	0.05004
2241.5	0.04729
2241	0.04274
2240.5	0.03128
2240	0.02694
2239.5	0.03761
2239	0.03324
2238.5	0.03536
2238	0.04353
2237.5	0.05111
2237	0.03521
2236.5	0.04004
2236	0.04367
2235.5	0.04735
2235	0.05294
2234.5	0.04977
2234	0.04316
2233.5	0.03852
2233	0.0343
2232.5	0.04099
2232	0.03682
2231.5	0.04908
2231	0.04852
2230.5	0.0479
2230	0.04249
2229.5	0.04423
2229	0.04718
2228.5	0.05854
2228	0.04662
2227.5	0.06641
2227	0.05692
2226.5	0.06875
2226	0.06892
2225.5	0.07159
2225	0.06872
2224.5	0.05798
2224	0.04486
2223.5	0.0499
2223	0.05081
2222.5	0.062
2222	0.06723
2221.5	0.06755
2221	0.07728
2220.5	0.06846
2220	0.06949
2219.5	0.06669
2219	0.06917
2218.5	0.05725
2218	0.07185
2217.5	0.06989
2217	0.06406
2216.5	0.07081
2216	0.05728
2215.5	0.07648
2215	0.0678
2214.5	0.08154
2214	0.08049
2213.5	0.08456
2213	0.077
2212.5	0.07491
2212	0.06605
2211.5	0.06876
2211	0.07481
2210.5	0.07298
2210	0.05972
2209.5	0.05309
2209	0.04717
2208.5	0.05617
2208	0.05138
2207.5	0.06543
2207	0.0645
2206.5	0.0753
2206	0.08264
2205.5	0.0896
2205	0.06407
2204.5	0.06739
2204	0.06705
2203.5	0.08342
2203	0.08451
2202.5	0.06298
2202	0.05996
2201.5	0.06586
2201	0.06622
2200.5	0.0554
2200	0.06023
2199.5	0.06223
2199	0.05586
2198.5	0.05302
2198	0.0562
2197.5	0.06304
2197	0.06295
2196.5	0.06202
2196	0.04956
2195.5	0.04712
2195	0.04532
2194.5	0.0504
2194	0.05591
2193.5	0.04012
2193	0.03984
2192.5	0.03891
2192	0.03372
2191.5	0.04554
2191	0.04287
2190.5	0.05543
2190	0.05073
2189.5	0.04272
2189	0.03242
2188.5	0.03888
2188	0.03394
2187.5	0.03815
2187	0.04535
2186.5	0.05009
2186	0.0589
2185.5	0.05867
2185	0.06808
2184.5	0.04867
2184	0.046
2183.5	0.03452
2183	0.04249
2182.5	0.04297
2182	0.03451
2181.5	0.03811
2181	0.04534
2180.5	0.03799
2180	0.04016
2179.5	0.02828
2179	0.01813
2178.5	0.02693
2178	0.0061
2177.5	0.01225
2177	0.0069
2176.5	0.01746
2176	0.03794
2175.5	0.04214
2175	0.04882
2174.5	0.03431
2174	0.03181
2173.5	0.03118
2173	0.03539
2172.5	0.03406
2172	0.0237
2171.5	0.02353
2171	0.02374
2170.5	0.01984
2170	0.02176
2169.5	0.03102
2169	0.03159
2168.5	0.03586
2168	0.04078
2167.5	0.03092
2167	0.02157
2166.5	0.01394
2166	0.02876
2165.5	0.03423
2165	0.03016
2164.5	0.03703
2164	0.0264
2163.5	0.03089
2163	0.02646
2162.5	0.0285
2162	0.02666
2161.5	0.03742
2161	0.04323
2160.5	0.0537
2160	0.03449
2159.5	0.02812
2159	0.03236
2158.5	0.03127
2158	0.03363
2157.5	0.03447
2157	0.03556
2156.5	0.03712
2156	0.03789
2155.5	0.04356
2155	0.04894
2154.5	0.04059
2154	0.04124
2153.5	0.03896
2153	0.04022
2152.5	0.04125
2152	0.03224
2151.5	0.03129
2151	0.026
2150.5	0.02372
2150	0.0326
2149.5	0.02812
2149	0.03562
2148.5	0.02694
2148	0.03992
2147.5	0.02717
2147	0.01065
2146.5	0.01661
2146	0.01543
2145.5	0.0391
2145	0.04048
2144.5	0.04769
2144	0.04214
2143.5	0.03795
2143	0.03337
2142.5	0.03055
2142	0.03217
2141.5	0.04104
2141	0.04241
2140.5	0.04206
2140	0.03632
2139.5	0.04733
2139	0.03963
2138.5	0.03444
2138	0.02843
2137.5	0.03561
2137	0.03522
2136.5	0.03402
2136	0.03083
2135.5	0.04034
2135	0.04486
2134.5	0.05829
2134	0.055
2133.5	0.04237
2133	0.04167
2132.5	0.03612
2132	0.03683
2131.5	0.03388
2131	0.0354
2130.5	0.03613
2130	0.03971
2129.5	0.03932
2129	0.0416
2128.5	0.04112
2128	0.03601
2127.5	0.03774
2127	0.04567
2126.5	0.0418
2126	0.04781
2125.5	0.04752
2125	0.04846
2124.5	0.04695
2124	0.03863
2123.5	0.03185
2123	0.03279
2122.5	0.04112
2122	0.04185
2121.5	0.04711
2121	0.04025
2120.5	0.02946
2120	0.03708
2119.5	0.02237
2119	0.03266
2118.5	0.02306
2118	0.03477
2117.5	0.03478
2117	0.04017
2116.5	0.03991
2116	0.0365
2115.5	0.03243
2115	0.03813
2114.5	0.03354
2114	0.03808
2113.5	0.03259
2113	0.03555
2112.5	0.04594
2112	0.0434
2111.5	0.04752
2111	0.02931
2110.5	0.03746
2110	0.04446
2109.5	0.0636
2109	0.05442
2108.5	0.06952
2108	0.05763
2107.5	0.05614
2107	0.04673
2106.5	0.04219
2106	0.03864
2105.5	0.04067
2105	0.05373
2104.5	0.05061
2104	0.04347
2103.5	0.0426
2103	0.03318
2102.5	0.03957
2102	0.05069
2101.5	0.06358
2101	0.07147
2100.5	0.07435
2100	0.0696
2099.5	0.07331
2099	0.07137
2098.5	0.07156
2098	0.04461
2097.5	0.03046
2097	0.0401
2096.5	0.05364
2096	0.06798
2095.5	0.06475
2095	0.05256
2094.5	0.04472
2094	0.0535
2093.5	0.05759
2093	0.06146
2092.5	0.05084
2092	0.05126
2091.5	0.06533
2091	0.06786
2090.5	0.071
2090	0.05803
2089.5	0.06191
2089	0.06526
2088.5	0.04926
2088	0.0401
2087.5	0.04252
2087	0.05735
2086.5	0.07074
2086	0.06915
2085.5	0.05875
2085	0.04612
2084.5	0.05836
2084	0.07091
2083.5	0.08693
2083	0.07371
2082.5	0.08323
2082	0.08293
2081.5	0.0941
2081	0.09106
2080.5	0.0796
2080	0.07681
2079.5	0.07135
2079	0.06611
2078.5	0.05972
2078	0.06043
2077.5	0.06012
2077	0.06498
2076.5	0.06571
2076	0.06094
2075.5	0.07387
2075	0.07224
2074.5	0.06675
2074	0.07865
2073.5	0.06985
2073	0.09062
2072.5	0.07712
2072	0.08421
2071.5	0.07124
2071	0.06121
2070.5	0.05366
2070	0.06256
2069.5	0.06139
2069	0.07766
2068.5	0.06288
2068	0.05549
2067.5	0.05352
2067	0.05028
2066.5	0.06033
2066	0.06325
2065.5	0.07725
2065	0.07764
2064.5	0.09201
2064	0.07653
2063.5	0.078
2063	0.07229
2062.5	0.08381
2062	0.08933
2061.5	0.08878
2061	0.08039
2060.5	0.08001
2060	0.08842
2059.5	0.10402
2059	0.08523
2058.5	0.0896
2058	0.08611
2057.5	0.09039
2057	0.0877
2056.5	0.08706
2056	0.08745
2055.5	0.09044
2055	0.09886
2054.5	0.10635
2054	0.10617
2053.5	0.09043
2053	0.08729
2052.5	0.09457
2052	0.09165
2051.5	0.09636
2051	0.09291
2050.5	0.07403
2050	0.07686
2049.5	0.07993
2049	0.1005
2048.5	0.10316
2048	0.10767
2047.5	0.09726
2047	0.09478
2046.5	0.09195
2046	0.08834
2045.5	0.08815
2045	0.09384
2044.5	0.08879
2044	0.09604
2043.5	0.08815
2043	0.09862
2042.5	0.10583
2042	0.11333
2041.5	0.10511
2041	0.11669
2040.5	0.11214
2040	0.11335
2039.5	0.09268
2039	0.08708
2038.5	0.08174
2038	0.10358
2037.5	0.11307
2037	0.10647
2036.5	0.09744
2036	0.08597
2035.5	0.10047
2035	0.10731
2034.5	0.12345
2034	0.11151
2033.5	0.12151
2033	0.12662
2032.5	0.10892
2032	0.10413
2031.5	0.09259
2031	0.09124
2030.5	0.10614
2030	0.09488
2029.5	0.10739
2029	0.11474
2028.5	0.11686
2028	0.13114
2027.5	0.13679
2027	0.13671
2026.5	0.1151
2026	0.10979
2025.5	0.11663
2025	0.1214
2024.5	0.11725
2024	0.11184
2023.5	0.11217
2023	0.11815
2022.5	0.11605
2022	0.12323
2021.5	0.11289
2021	0.12562
2020.5	0.13946
2020	0.13828
2019.5	0.12125
2019	0.09832
2018.5	0.10477
2018	0.11679
2017.5	0.12827
2017	0.12677
2016.5	0.1247
2016	0.11774
2015.5	0.11788
2015	0.11655
2014.5	0.11704
2014	0.1261
2013.5	0.13782
2013	0.14309
2012.5	0.15011
2012	0.15115
2011.5	0.13497
2011	0.13339
2010.5	0.13445
2010	0.13251
2009.5	0.14374
2009	0.13564
2008.5	0.1324
2008	0.12795
2007.5	0.13672
2007	0.13798
2006.5	0.14214
2006	0.12792
2005.5	0.1237
2005	0.12621
2004.5	0.12531
2004	0.13522
2003.5	0.12636
2003	0.13185
2002.5	0.12024
2002	0.11998
2001.5	0.13544
2001	0.15527
2000.5	0.15409
2000	0.14675
1999.5	0.13151
1999	0.14122
1998.5	0.13868
1998	0.1424
1997.5	0.1383
1997	0.13446
1996.5	0.14537
1996	0.14983
1995.5	0.15195
1995	0.14806
1994.5	0.16819
1994	0.1686
1993.5	0.16533
1993	0.15698
1992.5	0.14709
1992	0.14957
1991.5	0.15386
1991	0.16303
1990.5	0.15149
1990	0.15912
1989.5	0.14574
1989	0.15531
1988.5	0.15447
1988	0.16102
1987.5	0.16427
1987	0.17047
1986.5	0.17125
1986	0.15773
1985.5	0.15508
1985	0.16046
1984.5	0.15927
1984	0.15814
1983.5	0.16041
1983	0.1721
1982.5	0.18763
1982	0.18399
1981.5	0.20436
1981	0.18559
1980.5	0.19323
1980	0.17932
1979.5	0.18688
1979	0.18895
1978.5	0.17721
1978	0.17328
1977.5	0.16187
1977	0.17813
1976.5	0.17174
1976	0.16999
1975.5	0.16962
1975	0.16947
1974.5	0.1759
1974	0.16217
1973.5	0.16182
1973	0.17115
1972.5	0.19268
1972	0.18569
1971.5	0.1698
1971	0.16642
1970.5	0.1551
1970	0.16203
1969.5	0.17002
1969	0.18258
1968.5	0.1783
1968	0.17969
1967.5	0.18175
1967	0.18058
1966.5	0.18993
1966	0.19255
1965.5	0.20975
1965	0.20719
1964.5	0.20658
1964	0.20241
1963.5	0.2001
1963	0.2008
1962.5	0.19513
1962	0.19172
1961.5	0.1876
1961	0.17647
1960.5	0.18806
1960	0.17766
1959.5	0.18341
1959	0.18794
1958.5	0.20006
1958	0.19925
1957.5	0.20751
1957	0.20847
1956.5	0.19655
1956	0.18478
1955.5	0.18562
1955	0.19883
1954.5	0.22338
1954	0.22334
1953.5	0.23041
1953	0.21974
1952.5	0.2108
1952	0.20705
1951.5	0.21583
1951	0.2122
1950.5	0.21562
1950	0.21953
1949.5	0.21845
1949	0.21785
1948.5	0.20551
1948	0.20973
1947.5	0.20903
1947	0.21374
1946.5	0.21667
1946	0.22812
1945.5	0.21646
1945	0.20881
1944.5	0.20519
1944	0.21073
1943.5	0.21753
1943	0.21477
1942.5	0.21535
1942	0.21192
1941.5	0.20702
1941	0.21738
1940.5	0.22594
1940	0.23176
1939.5	0.21855
1939	0.22437
1938.5	0.22594
1938	0.22529
1937.5	0.2322
1937	0.20839
1936.5	0.21179
1936	0.19521
1935.5	0.2106
1935	0.20499
1934.5	0.20915
1934	0.19586
1933.5	0.19859
1933	0.19909
1932.5	0.22136
1932	0.22604
1931.5	0.23
1931	0.23121
1930.5	0.21781
1930	0.22417
1929.5	0.23753
1929	0.24195
1928.5	0.23785
1928	0.22035
1927.5	0.21804
1927	0.22012
1926.5	0.22705
1926	0.22941
1925.5	0.23316
1925	0.22579
1924.5	0.21789
1924	0.19348
1923.5	0.1853
1923	0.17265
1922.5	0.19817
1922	0.19263
1921.5	0.20362
1921	0.21495
1920.5	0.22236
1920	0.22401
1919.5	0.20588
1919	0.20649
1918.5	0.22571
1918	0.22141
1917.5	0.22596
1917	0.22254
1916.5	0.23117
1916	0.23637
1915.5	0.19753
1915	0.20188
1914.5	0.20918
1914	0.22197
1913.5	0.21143
1913	0.21751
1912.5	0.21282
1912	0.21113
1911.5	0.20915
1911	0.20652
1910.5	0.21701
1910	0.21171
1909.5	0.19432
1909	0.19062
1908.5	0.19254
1908	0.20027
1907.5	0.19899
1907	0.19788
1906.5	0.18397
1906	0.16693
1905.5	0.16145
1905	0.18419
1904.5	0.18242
1904	0.18507
1903.5	0.18205
1903	0.17926
1902.5	0.17233
1902	0.16862
1901.5	0.16796
1901	0.17571
1900.5	0.18624
1900	0.19704
1899.5	0.19191
1899	0.18144
1898.5	0.17219
1898	0.16296
1897.5	0.16989
1897	0.16483
1896.5	0.16795
1896	0.15927
1895.5	0.15432
1895	0.14531
1894.5	0.14663
1894	0.14764
1893.5	0.16003
1893	0.15626
1892.5	0.15582
1892	0.14727
1891.5	0.14678
1891	0.1411
1890.5	0.1407
1890	0.14662
1889.5	0.14801
1889	0.1402
1888.5	0.13242
1888	0.13339
1887.5	0.1298
1887	0.13331
1886.5	0.13352
1886	0.12902
1885.5	0.12163
1885	0.11889
1884.5	0.11926
1884	0.12376
1883.5	0.12469
1883	0.11303
1882.5	0.1073
1882	0.10354
1881.5	0.10908
1881	0.10983
1880.5	0.11158
1880	0.1076
1879.5	0.10156
1879	0.08781
1878.5	0.08822
1878	0.09048
1877.5	0.0969
1877	0.09724
1876.5	0.09412
1876	0.09315
1875.5	0.08883
1875	0.08337
1874.5	0.07338
1874	0.06802
1873.5	0.06605
1873	0.0644
1872.5	0.06613
1872	0.05955
1871.5	0.06112
1871	0.0612
1870.5	0.06049
1870	0.0595
1869.5	0.05551
1869	0.05675
1868.5	0.05401
1868	0.05179
1867.5	0.05562
1867	0.05093
1866.5	0.05541
1866	0.05163
1865.5	0.0466
1865	0.0449
1864.5	0.04665
1864	0.05331
1863.5	0.04996
1863	0.04613
1862.5	0.04069
1862	0.04152
1861.5	0.04215
1861	0.0412
1860.5	0.04149
1860	0.03934
1859.5	0.04175
1859	0.03874
1858.5	0.03766
1858	0.03627
1857.5	0.03616
1857	0.03499
1856.5	0.03826
1856	0.03612
1855.5	0.03635
1855	0.03883
1854.5	0.03793
1854	0.03703
1853.5	0.03576
1853	0.03688
1852.5	0.03364
1852	0.03359
1851.5	0.02992
1851	0.03168
1850.5	0.03302
1850	0.03219
1849.5	0.03432
1849	0.03327
1848.5	0.03342
1848	0.02985
1847.5	0.03267
1847	0.0324
1846.5	0.03197
1846	0.0337
1845.5	0.03136
1845	0.03458
1844.5	0.03055
1844	0.03448
1843.5	0.0309
1843	0.03266
1842.5	0.02882
1842	0.02949
1841.5	0.03205
1841	0.0396
1840.5	0.03674
1840	0.02943
1839.5	0.02931
1839	0.03263
1838.5	0.03832
1838	0.03801
1837.5	0.03644
1837	0.03515
1836.5	0.03284
1836	0.03217
1835.5	0.03287
1835	0.03411
1834.5	0.03626
1834	0.03483
1833.5	0.03296
1833	0.03315
1832.5	0.03503
1832	0.03651
1831.5	0.0349
1831	0.03603
1830.5	0.03686
1830	0.03799
1829.5	0.0338
1829	0.03383
1828.5	0.02983
1828	0.02927
1827.5	0.0304
1827	0.02895
1826.5	0.03311
1826	0.03543
1825.5	0.03587
1825	0.03335
1824.5	0.03094
1824	0.03062
1823.5	0.03274
1823	0.03312
1822.5	0.032
1822	0.03453
1821.5	0.03275
1821	0.03564
1820.5	0.03501
1820	0.03045
1819.5	0.03012
1819	0.03207
1818.5	0.03449
1818	0.03409
1817.5	0.0362
1817	0.03581
1816.5	0.0388
1816	0.03664
1815.5	0.0368
1815	0.03488
1814.5	0.03556
1814	0.03343
1813.5	0.03245
1813	0.03071
1812.5	0.02946
1812	0.03058
1811.5	0.03002
1811	0.03168
1810.5	0.03433
1810	0.03589
1809.5	0.03491
1809	0.0349
1808.5	0.03601
1808	0.03586
1807.5	0.035
1807	0.03477
1806.5	0.03512
1806	0.03301
1805.5	0.03666
1805	0.03468
1804.5	0.03304
1804	0.03009
1803.5	0.03107
1803	0.03235
1802.5	0.03447
1802	0.03595
1801.5	0.03616
1801	0.03427
1800.5	0.03095
1800	0.03124
1799.5	0.03258
1799	0.0353
1798.5	0.0356
1798	0.03591
1797.5	0.03324
1797	0.032
1796.5	0.03288
1796	0.03133
1795.5	0.02888
1795	0.02929
1794.5	0.03145
1794	0.03607
1793.5	0.03583
1793	0.03578
1792.5	0.03296
1792	0.02972
1791.5	0.02806
1791	0.02736
1790.5	0.03156
1790	0.03164
1789.5	0.03169
1789	0.03011
1788.5	0.02882
1788	0.02829
1787.5	0.02963
1787	0.03172
1786.5	0.03172
1786	0.03145
1785.5	0.03073
1785	0.03205
1784.5	0.03129
1784	0.03165
1783.5	0.03327
1783	0.03151
1782.5	0.03122
1782	0.03276
1781.5	0.03377
1781	0.03563
1780.5	0.03457
1780	0.03675
1779.5	0.03534
1779	0.03492
1778.5	0.03516
1778	0.03362
1777.5	0.0358
1777	0.03753
1776.5	0.03932
1776	0.03949
1775.5	0.03679
1775	0.03426
1774.5	0.0348
1774	0.03404
1773.5	0.03335
1773	0.03536
1772.5	0.03681
1772	0.03841
1771.5	0.03931
1771	0.04063
1770.5	0.04266
1770	0.04506
1769.5	0.04719
1769	0.04709
1768.5	0.04713
1768	0.04846
1767.5	0.0494
1767	0.05098
1766.5	0.05112
1766	0.05151
1765.5	0.05134
1765	0.05158
1764.5	0.05252
1764	0.05365
1763.5	0.05144
1763	0.05048
1762.5	0.04779
1762	0.04868
1761.5	0.04864
1761	0.05035
1760.5	0.04852
1760	0.04826
1759.5	0.04839
1759	0.04923
1758.5	0.04939
1758	0.05036
1757.5	0.05159
1757	0.05097
1756.5	0.04932
1756	0.04907
1755.5	0.04977
1755	0.05091
1754.5	0.05135
1754	0.05289
1753.5	0.05318
1753	0.05298
1752.5	0.05168
1752	0.05084
1751.5	0.05202
1751	0.05513
1750.5	0.05681
1750	0.05709
1749.5	0.05689
1749	0.05727
1748.5	0.06073
1748	0.06476
1747.5	0.06754
1747	0.06877
1746.5	0.07028
1746	0.07132
1745.5	0.07112
1745	0.07209
1744.5	0.07516
1744	0.07601
1743.5	0.07811
1743	0.07877
1742.5	0.08243
1742	0.08501
1741.5	0.08914
1741	0.0915
1740.5	0.09476
1740	0.09685
1739.5	0.10071
1739	0.10343
1738.5	0.10735
1738	0.10862
1737.5	0.11098
1737	0.11109
1736.5	0.1127
1736	0.11333
1735.5	0.11592
1735	0.11643
1734.5	0.11665
1734	0.1177
1733.5	0.11582
1733	0.11434
1732.5	0.11446
1732	0.1163
1731.5	0.11475
1731	0.11386
1730.5	0.11376
1730	0.11538
1729.5	0.11595
1729	0.11707
1728.5	0.12068
1728	0.1227
1727.5	0.12463
1727	0.12595
1726.5	0.12795
1726	0.12988
1725.5	0.13414
1725	0.13804
1724.5	0.14083
1724	0.14399
1723.5	0.14883
1723	0.1507
1722.5	0.15114
1722	0.15233
1721.5	0.15381
1721	0.15421
1720.5	0.15474
1720	0.15522
1719.5	0.1586
1719	0.15954
1718.5	0.1591
1718	0.15492
1717.5	0.15158
1717	0.15121
1716.5	0.15206
1716	0.15036
1715.5	0.1492
1715	0.1485
1714.5	0.14633
1714	0.14419
1713.5	0.1434
1713	0.13981
1712.5	0.13867
1712	0.13312
1711.5	0.13359
1711	0.12663
1710.5	0.12506
1710	0.12197
1709.5	0.12211
1709	0.11972
1708.5	0.117
1708	0.11043
1707.5	0.10925
1707	0.10746
1706.5	0.11263
1706	0.11061
1705.5	0.108
1705	0.10136
1704.5	0.09776
1704	0.09757
1703.5	0.09687
1703	0.09663
1702.5	0.09472
1702	0.09403
1701.5	0.09486
1701	0.09597
1700.5	0.09308
1700	0.09268
1699.5	0.09157
1699	0.08569
1698.5	0.08538
1698	0.08303
1697.5	0.08478
1697	0.08419
1696.5	0.07939
1696	0.07813
1695.5	0.07415
1695	0.07356
1694.5	0.07389
1694	0.07649
1693.5	0.07539
1693	0.07368
1692.5	0.07017
1692	0.0714
1691.5	0.06975
1691	0.07086
1690.5	0.0673
1690	0.06734
1689.5	0.06689
1689	0.06789
1688.5	0.06719
1688	0.06598
1687.5	0.06495
1687	0.06616
1686.5	0.06699
1686	0.06856
1685.5	0.06898
1685	0.06839
1684.5	0.06884
1684	0.06803
1683.5	0.06964
1683	0.06841
1682.5	0.07049
1682	0.06971
1681.5	0.0704
1681	0.072
1680.5	0.0714
1680	0.07268
1679.5	0.07181
1679	0.06631
1678.5	0.06567
1678	0.06372
1677.5	0.06591
1677	0.06694
1676.5	0.069
1676	0.06854
1675.5	0.07064
1675	0.07026
1674.5	0.0708
1674	0.07189
1673.5	0.07082
1673	0.07175
1672.5	0.06974
1672	0.0694
1671.5	0.06936
1671	0.07022
1670.5	0.07157
1670	0.07172
1669.5	0.07392
1669	0.073
1668.5	0.07434
1668	0.0745
1667.5	0.0728
1667	0.07121
1666.5	0.06915
1666	0.06821
1665.5	0.0693
1665	0.06852
1664.5	0.07003
1664	0.06846
1663.5	0.06785
1663	0.06775
1662.5	0.06691
1662	0.06741
1661.5	0.06707
1661	0.06506
1660.5	0.06496
1660	0.06481
1659.5	0.0653
1659	0.06559
1658.5	0.06383
1658	0.06215
1657.5	0.05805
1657	0.0585
1656.5	0.05893
1656	0.06031
1655.5	0.06293
1655	0.06229
1654.5	0.06157
1654	0.05974
1653.5	0.06022
1653	0.06171
1652.5	0.06013
1652	0.06269
1651.5	0.06068
1651	0.0621
1650.5	0.05986
[truncated: 2,901 more rows]

## Sheet: Nd2O3
2650	0.02526		Nd2O3
2649.5	0.01915
2649	0.02218
2648.5	0.02518
2648	0.0197
2647.5	0.01382
2647	0.02631
2646.5	0.02212
2646	0.01771
2645.5	0.01309
2645	0.02071
2644.5	0.02894
2644	0.02874
2643.5	0.02512
2643	0.01542
2642.5	0.01397
2642	0
2641.5	0.00842
2641	0.00723
2640.5	0.01038
2640	0.0159
2639.5	0.01881
2639	0.01944
2638.5	0.02345
2638	0.01628
2637.5	0.01733
2637	0.03016
2636.5	0.03511
2636	0.05119
2635.5	0.04904
2635	0.0359
2634.5	0.03333
2634	0.02404
2633.5	0.02108
2633	0.03319
2632.5	0.03863
2632	0.04274
2631.5	0.03463
2631	0.03324
2630.5	0.03228
2630	0.02868
2629.5	0.02315
2629	0.0215
2628.5	0.02713
2628	0.02786
2627.5	0.03791
2627	0.03841
2626.5	0.01687
2626	0.01769
2625.5	0.02759
2625	0.04495
2624.5	0.04292
2624	0.03485
2623.5	0.04284
2623	0.05327
2622.5	0.04286
2622	0.04207
2621.5	0.0317
2621	0.02669
2620.5	0.02153
2620	0.02249
2619.5	0.02031
2619	0.01298
2618.5	0.00557
2618	0.00883
2617.5	0.0195
2617	0.01438
2616.5	0.00339
2616	0.02165
2615.5	0.01912
2615	0.03052
2614.5	0.04021
2614	0.05761
2613.5	0.05655
2613	0.05766
2612.5	0.06932
2612	0.09363
2611.5	0.10778
2611	0.11651
2610.5	0.13455
2610	0.14502
2609.5	0.15549
2609	0.1525
2608.5	0.13717
2608	0.14765
2607.5	0.15838
2607	0.15831
2606.5	0.14692
2606	0.15844
2605.5	0.1436
2605	0.14549
2604.5	0.14605
2604	0.15147
2603.5	0.17355
2603	0.17706
2602.5	0.17969
2602	0.18784
2601.5	0.18724
2601	0.17472
2600.5	0.17561
2600	0.16048
2599.5	0.15625
2599	0.1559
2598.5	0.15779
2598	0.15551
2597.5	0.15801
2597	0.15163
2596.5	0.15736
2596	0.15819
2595.5	0.1379
2595	0.12609
2594.5	0.12968
2594	0.11962
2593.5	0.11715
2593	0.1157
2592.5	0.13172
2592	0.11697
2591.5	0.12542
2591	0.12233
2590.5	0.11931
2590	0.11674
2589.5	0.11723
2589	0.14263
2588.5	0.13514
2588	0.14
2587.5	0.15083
2587	0.13872
2586.5	0.1324
2586	0.12794
2585.5	0.12086
2585	0.11723
2584.5	0.09503
2584	0.08988
2583.5	0.08601
2583	0.09807
2582.5	0.08923
2582	0.11556
2581.5	0.11541
2581	0.13157
2580.5	0.14414
2580	0.14823
2579.5	0.14307
2579	0.15133
2578.5	0.14498
2578	0.14099
2577.5	0.14196
2577	0.13498
2576.5	0.13184
2576	0.12816
2575.5	0.0986
2575	0.0905
2574.5	0.07218
2574	0.06069
2573.5	0.06079
2573	0.05568
2572.5	0.05333
2572	0.05725
2571.5	0.05065
2571	0.05652
2570.5	0.05234
2570	0.04888
2569.5	0.04671
2569	0.03999
2568.5	0.0466
2568	0.0452
2567.5	0.03974
2567	0.04494
2566.5	0.0508
2566	0.05692
2565.5	0.05771
2565	0.06157
2564.5	0.07203
2564	0.07168
2563.5	0.06894
2563	0.08067
2562.5	0.07987
2562	0.07977
2561.5	0.07986
2561	0.09616
2560.5	0.09195
2560	0.086
2559.5	0.08314
2559	0.07642
2558.5	0.07309
2558	0.06498
2557.5	0.06372
2557	0.06259
2556.5	0.06766
2556	0.06848
2555.5	0.0559
2555	0.05892
2554.5	0.05091
2554	0.05899
2553.5	0.06322
2553	0.06849
2552.5	0.06504
2552	0.06745
2551.5	0.0736
2551	0.0772
2550.5	0.06732
2550	0.06985
2549.5	0.07306
2549	0.07669
2548.5	0.07117
2548	0.07695
2547.5	0.07401
2547	0.07832
2546.5	0.07841
2546	0.09236
2545.5	0.09749
2545	0.09005
2544.5	0.09416
2544	0.09678
2543.5	0.08865
2543	0.08059
2542.5	0.09125
2542	0.09485
2541.5	0.08324
2541	0.08539
2540.5	0.07969
2540	0.08049
2539.5	0.07471
2539	0.06968
2538.5	0.07571
2538	0.08425
2537.5	0.08827
2537	0.09697
2536.5	0.09558
2536	0.08439
2535.5	0.0851
2535	0.08019
2534.5	0.07634
2534	0.07561
2533.5	0.06337
2533	0.07369
2532.5	0.08046
2532	0.08869
2531.5	0.08403
2531	0.08255
2530.5	0.08316
2530	0.08456
2529.5	0.08589
2529	0.08998
2528.5	0.09062
2528	0.08132
2527.5	0.08264
2527	0.08377
2526.5	0.07672
2526	0.07595
2525.5	0.07006
2525	0.06888
2524.5	0.06892
2524	0.07265
2523.5	0.07305
2523	0.07003
2522.5	0.07382
2522	0.07164
2521.5	0.07523
2521	0.07481
2520.5	0.08507
2520	0.07839
2519.5	0.08301
2519	0.07789
2518.5	0.083
2518	0.09245
2517.5	0.09912
2517	0.1018
2516.5	0.10181
2516	0.10732
2515.5	0.10084
2515	0.10015
2514.5	0.10174
2514	0.09846
2513.5	0.09089
2513	0.08705
2512.5	0.09099
2512	0.09332
2511.5	0.09057
2511	0.08785
2510.5	0.08928
2510	0.08572
2509.5	0.09006
2509	0.08866
2508.5	0.08521
2508	0.08569
2507.5	0.08802
2507	0.0874
2506.5	0.08828
2506	0.09055
2505.5	0.08698
2505	0.08996
2504.5	0.08969
2504	0.08614
2503.5	0.08442
2503	0.08737
2502.5	0.08739
2502	0.08748
2501.5	0.08136
2501	0.08297
2500.5	0.08437
2500	0.07944
2499.5	0.077
2499	0.08127
2498.5	0.08388
2498	0.08808
2497.5	0.09145
2497	0.08362
2496.5	0.07527
2496	0.08082
2495.5	0.07832
2495	0.08157
2494.5	0.08094
2494	0.08248
2493.5	0.08737
2493	0.08523
2492.5	0.08065
2492	0.07525
2491.5	0.07646
2491	0.08193
2490.5	0.08059
2490	0.09034
2489.5	0.09311
2489	0.08884
2488.5	0.09255
2488	0.09116
2487.5	0.09468
2487	0.09355
2486.5	0.0884
2486	0.09431
2485.5	0.09464
2485	0.0909
2484.5	0.08752
2484	0.09253
2483.5	0.09448
2483	0.09712
2482.5	0.09735
2482	0.09737
2481.5	0.10135
2481	0.10624
2480.5	0.11155
2480	0.11682
2479.5	0.11634
2479	0.11385
2478.5	0.11686
2478	0.11778
2477.5	0.11661
2477	0.11554
2476.5	0.11777
2476	0.11634
2475.5	0.11358
2475	0.11583
2474.5	0.11214
2474	0.11074
2473.5	0.11047
2473	0.11788
2472.5	0.11621
2472	0.11989
2471.5	0.11537
2471	0.1155
2470.5	0.12006
2470	0.11567
2469.5	0.121
2469	0.13017
2468.5	0.13013
2468	0.13963
2467.5	0.14652
2467	0.1393
2466.5	0.14295
2466	0.14638
2465.5	0.14711
2465	0.14898
2464.5	0.15433
2464	0.15249
2463.5	0.15885
2463	0.15921
2462.5	0.15539
2462	0.15523
2461.5	0.15226
2461	0.15111
2460.5	0.15172
2460	0.15268
2459.5	0.15798
2459	0.15494
2458.5	0.15775
2458	0.15275
2457.5	0.15533
2457	0.15457
2456.5	0.15203
2456	0.15528
2455.5	0.15844
2455	0.15559
2454.5	0.16153
2454	0.16153
2453.5	0.16171
2453	0.15604
2452.5	0.14983
2452	0.15057
2451.5	0.15412
2451	0.15052
2450.5	0.15248
2450	0.15132
2449.5	0.14461
2449	0.14567
2448.5	0.14494
2448	0.14537
2447.5	0.15249
2447	0.14869
2446.5	0.15639
2446	0.16117
2445.5	0.1578
2445	0.15347
2444.5	0.15842
2444	0.15498
2443.5	0.16025
2443	0.16251
2442.5	0.16268
2442	0.16325
2441.5	0.16585
2441	0.16253
2440.5	0.16451
2440	0.16903
2439.5	0.16318
2439	0.16288
2438.5	0.16676
2438	0.16745
2437.5	0.17037
2437	0.16832
2436.5	0.16557
2436	0.16399
2435.5	0.16496
2435	0.16211
2434.5	0.16348
2434	0.16548
2433.5	0.1639
2433	0.16935
2432.5	0.17152
2432	0.17222
2431.5	0.17411
2431	0.17177
2430.5	0.17309
2430	0.1727
2429.5	0.17301
2429	0.17343
2428.5	0.17294
2428	0.17296
2427.5	0.17807
2427	0.17955
2426.5	0.17758
2426	0.17393
2425.5	0.17448
2425	0.17578
2424.5	0.17365
2424	0.17901
2423.5	0.18295
2423	0.18886
2422.5	0.19813
2422	0.20371
2421.5	0.209
2421	0.20507
2420.5	0.20001
2420	0.20283
2419.5	0.20603
2419	0.20674
2418.5	0.20645
2418	0.20449
2417.5	0.20919
2417	0.20951
2416.5	0.20585
2416	0.20227
2415.5	0.20249
2415	0.20118
2414.5	0.19963
2414	0.20344
2413.5	0.2044
2413	0.20509
2412.5	0.20205
2412	0.2031
2411.5	0.20671
2411	0.20165
2410.5	0.20081
2410	0.20432
2409.5	0.2012
2409	0.1964
2408.5	0.19885
2408	0.19839
2407.5	0.1989
2407	0.19844
2406.5	0.19598
2406	0.19559
2405.5	0.19394
2405	0.19051
2404.5	0.18892
2404	0.187
2403.5	0.18749
2403	0.19148
2402.5	0.18982
2402	0.18822
2401.5	0.18499
2401	0.18198
2400.5	0.17727
2400	0.17578
2399.5	0.18044
2399	0.17858
2398.5	0.17741
2398	0.17845
2397.5	0.1824
2397	0.17906
2396.5	0.17224
2396	0.17427
2395.5	0.17187
2395	0.17211
2394.5	0.17275
2394	0.17749
2393.5	0.17716
2393	0.17492
2392.5	0.17427
2392	0.17399
2391.5	0.17571
2391	0.17266
2390.5	0.17277
2390	0.17448
2389.5	0.17473
2389	0.17664
2388.5	0.17392
2388	0.17361
2387.5	0.17096
2387	0.16655
2386.5	0.16754
2386	0.16513
2385.5	0.16375
2385	0.16204
2384.5	0.16261
2384	0.16027
2383.5	0.15863
2383	0.15555
2382.5	0.15292
2382	0.14973
2381.5	0.15074
2381	0.14812
2380.5	0.14073
2380	0.13933
2379.5	0.13692
2379	0.13466
2378.5	0.1328
2378	0.13073
2377.5	0.12885
2377	0.12842
2376.5	0.12653
2376	0.1245
2375.5	0.1246
2375	0.12431
2374.5	0.12387
2374	0.12359
2373.5	0.12377
2373	0.11963
2372.5	0.11559
2372	0.11382
2371.5	0.11354
2371	0.11108
2370.5	0.10661
2370	0.10612
2369.5	0.10712
2369	0.1058
2368.5	0.10395
2368	0.09929
2367.5	0.09755
2367	0.09682
2366.5	0.0963
2366	0.091
2365.5	0.08722
2365	0.08533
2364.5	0.08631
2364	0.08398
2363.5	0.08322
2363	0.07892
2362.5	0.07569
2362	0.07496
2361.5	0.07557
2361	0.07548
2360.5	0.0749
2360	0.07418
2359.5	0.07586
2359	0.07774
2358.5	0.07479
2358	0.07268
2357.5	0.07152
2357	0.06987
2356.5	0.07088
2356	0.07065
2355.5	0.06998
2355	0.06753
2354.5	0.06661
2354	0.06564
2353.5	0.06513
2353	0.06362
2352.5	0.062
2352	0.06303
2351.5	0.06123
2351	0.06117
2350.5	0.06349
2350	0.06108
2349.5	0.06037
2349	0.05954
2348.5	0.05982
2348	0.06276
2347.5	0.06062
2347	0.05977
2346.5	0.05954
2346	0.0579
2345.5	0.05775
2345	0.05934
2344.5	0.05906
2344	0.05731
2343.5	0.05805
2343	0.05897
2342.5	0.05977
2342	0.06074
2341.5	0.05867
2341	0.05994
2340.5	0.06093
2340	0.06013
2339.5	0.06047
2339	0.05952
2338.5	0.05924
2338	0.05682
2337.5	0.05834
2337	0.06052
2336.5	0.05957
2336	0.0585
2335.5	0.05898
2335	0.0595
2334.5	0.06003
2334	0.05983
2333.5	0.05864
2333	0.05892
2332.5	0.05864
2332	0.05898
2331.5	0.05905
2331	0.05773
2330.5	0.05756
2330	0.05741
2329.5	0.05717
2329	0.05615
2328.5	0.05784
2328	0.0573
2327.5	0.0583
2327	0.0585
2326.5	0.05991
2326	0.05824
2325.5	0.05679
2325	0.05724
2324.5	0.05698
2324	0.05705
2323.5	0.05725
2323	0.05843
2322.5	0.05743
2322	0.05576
2321.5	0.05571
2321	0.0543
2320.5	0.05388
2320	0.05379
2319.5	0.05309
2319	0.05273
2318.5	0.0521
2318	0.05166
2317.5	0.05353
2317	0.05093
2316.5	0.05035
2316	0.05219
2315.5	0.05168
2315	0.05114
2314.5	0.05004
2314	0.05146
2313.5	0.05105
2313	0.05231
2312.5	0.05025
2312	0.04913
2311.5	0.04792
2311	0.04554
2310.5	0.04586
2310	0.0449
2309.5	0.04141
2309	0.03998
2308.5	0.04031
2308	0.04143
2307.5	0.0408
2307	0.04041
2306.5	0.03894
2306	0.03971
2305.5	0.04055
2305	0.03992
2304.5	0.03797
2304	0.03744
2303.5	0.03734
2303	0.03692
2302.5	0.03755
2302	0.03428
2301.5	0.03391
2301	0.03276
2300.5	0.03373
2300	0.03175
2299.5	0.03286
2299	0.03375
2298.5	0.03214
2298	0.03353
2297.5	0.03329
2297	0.03397
2296.5	0.035
2296	0.03472
2295.5	0.03492
2295	0.03485
2294.5	0.03297
2294	0.03351
2293.5	0.03374
2293	0.03236
2292.5	0.0333
2292	0.03294
2291.5	0.0336
2291	0.03473
2290.5	0.03408
2290	0.03319
2289.5	0.0317
2289	0.03089
2288.5	0.02981
2288	0.02862
2287.5	0.0279
2287	0.02643
2286.5	0.02606
2286	0.02576
2285.5	0.0244
2285	0.02337
2284.5	0.02311
2284	0.02226
2283.5	0.02286
2283	0.02185
2282.5	0.02266
2282	0.02363
2281.5	0.02255
2281	0.02223
2280.5	0.02136
2280	0.02077
2279.5	0.02016
2279	0.0203
2278.5	0.02074
2278	0.02081
2277.5	0.02096
2277	0.02216
2276.5	0.02234
2276	0.02304
2275.5	0.02187
2275	0.02261
2274.5	0.02313
2274	0.02359
2273.5	0.02362
2273	0.02375
2272.5	0.0255
2272	0.02516
2271.5	0.02659
2271	0.02694
2270.5	0.02623
2270	0.02708
2269.5	0.02702
2269	0.02701
2268.5	0.02646
2268	0.02729
2267.5	0.02849
2267	0.02974
2266.5	0.02875
2266	0.02876
2265.5	0.02938
2265	0.0293
2264.5	0.02904
2264	0.02993
2263.5	0.02953
2263	0.02986
2262.5	0.03054
2262	0.03074
2261.5	0.03058
2261	0.03102
2260.5	0.03194
2260	0.03275
2259.5	0.03354
2259	0.03433
2258.5	0.03677
2258	0.03754
2257.5	0.03718
2257	0.03782
2256.5	0.03848
2256	0.03909
2255.5	0.03864
2255	0.03917
2254.5	0.03964
2254	0.0402
2253.5	0.04052
2253	0.04117
2252.5	0.04051
2252	0.04006
2251.5	0.03999
2251	0.04017
2250.5	0.04054
2250	0.04038
2249.5	0.03877
2249	0.03888
2248.5	0.03977
2248	0.03977
2247.5	0.03983
2247	0.04038
2246.5	0.04008
2246	0.03958
2245.5	0.04077
2245	0.04051
2244.5	0.04156
2244	0.04302
2243.5	0.04312
2243	0.04386
2242.5	0.04418
2242	0.04461
2241.5	0.04467
2241	0.04387
2240.5	0.04467
2240	0.0457
2239.5	0.04612
2239	0.04642
2238.5	0.04714
2238	0.04671
2237.5	0.04665
2237	0.04661
2236.5	0.0468
2236	0.04736
2235.5	0.04632
2235	0.04809
2234.5	0.0495
2234	0.05026
2233.5	0.05077
2233	0.05115
2232.5	0.05271
2232	0.05306
2231.5	0.05326
2231	0.05344
2230.5	0.05364
2230	0.0547
2229.5	0.05483
2229	0.05536
2228.5	0.05588
2228	0.05644
2227.5	0.05765
2227	0.05856
2226.5	0.05953
2226	0.06019
2225.5	0.06067
2225	0.06115
2224.5	0.06142
2224	0.06239
2223.5	0.0628
2223	0.06303
2222.5	0.06338
2222	0.06408
2221.5	0.06463
2221	0.06468
2220.5	0.06633
2220	0.06688
2219.5	0.06723
2219	0.06726
2218.5	0.06722
2218	0.06678
2217.5	0.06767
2217	0.06704
2216.5	0.06647
2216	0.06696
2215.5	0.06659
2215	0.06633
2214.5	0.06603
2214	0.0664
2213.5	0.06718
2213	0.06781
2212.5	0.06853
2212	0.06879
2211.5	0.06961
2211	0.06983
2210.5	0.06946
2210	0.06944
2209.5	0.06917
2209	0.06916
2208.5	0.06799
2208	0.0675
2207.5	0.06775
2207	0.06744
2206.5	0.0669
2206	0.06724
2205.5	0.06696
2205	0.06587
2204.5	0.06524
2204	0.06569
2203.5	0.06461
2203	0.06411
2202.5	0.06328
2202	0.06237
2201.5	0.06139
2201	0.06082
2200.5	0.06006
2200	0.0599
2199.5	0.05857
2199	0.05699
2198.5	0.05688
2198	0.05611
2197.5	0.05465
2197	0.05387
2196.5	0.05288
2196	0.0536
2195.5	0.05191
2195	0.05099
2194.5	0.05092
2194	0.04985
2193.5	0.04887
2193	0.04724
2192.5	0.04644
2192	0.04485
2191.5	0.04392
2191	0.04347
2190.5	0.04304
2190	0.04264
2189.5	0.04216
2189	0.04227
2188.5	0.0422
2188	0.04107
2187.5	0.03945
2187	0.03903
2186.5	0.03848
2186	0.03762
2185.5	0.03725
2185	0.03658
2184.5	0.03595
2184	0.03529
2183.5	0.03504
2183	0.0353
2182.5	0.03444
2182	0.03355
2181.5	0.03342
2181	0.03331
2180.5	0.03243
2180	0.03193
2179.5	0.03165
2179	0.03154
2178.5	0.03126
2178	0.03142
2177.5	0.03087
2177	0.03028
2176.5	0.03036
2176	0.02878
2175.5	0.0284
2175	0.02805
2174.5	0.0267
2174	0.0254
2173.5	0.02511
2173	0.0252
2172.5	0.02462
2172	0.02482
2171.5	0.02507
2171	0.02531
2170.5	0.02545
2170	0.02587
2169.5	0.02645
2169	0.02633
2168.5	0.02616
2168	0.02601
2167.5	0.02538
2167	0.02458
2166.5	0.02449
2166	0.02408
2165.5	0.02378
2165	0.02356
2164.5	0.02325
2164	0.02279
2163.5	0.02262
2163	0.02186
2162.5	0.0219
2162	0.02231
2161.5	0.02239
2161	0.02239
2160.5	0.02161
2160	0.02145
2159.5	0.02125
2159	0.02123
2158.5	0.02081
2158	0.02105
2157.5	0.02115
2157	0.02176
2156.5	0.02219
2156	0.02219
2155.5	0.02197
2155	0.02156
2154.5	0.02146
2154	0.02223
2153.5	0.02181
2153	0.02221
2152.5	0.02151
2152	0.02192
2151.5	0.02278
2151	0.02283
2150.5	0.0233
2150	0.02288
2149.5	0.02289
2149	0.02312
2148.5	0.02312
2148	0.02303
2147.5	0.02252
2147	0.02245
2146.5	0.02191
2146	0.0221
2145.5	0.02102
2145	0.02119
2144.5	0.0206
2144	0.02053
2143.5	0.02068
2143	0.02131
2142.5	0.02157
2142	0.02154
2141.5	0.02223
2141	0.02225
2140.5	0.02299
2140	0.02332
2139.5	0.02304
2139	0.02335
2138.5	0.02348
2138	0.02318
2137.5	0.02327
2137	0.02372
2136.5	0.02412
2136	0.02466
2135.5	0.02427
2135	0.02505
2134.5	0.02564
2134	0.02519
2133.5	0.02495
2133	0.02473
2132.5	0.0251
2132	0.02594
2131.5	0.02532
2131	0.02528
2130.5	0.0256
2130	0.02542
2129.5	0.0248
2129	0.0247
2128.5	0.02379
2128	0.02387
2127.5	0.02339
2127	0.02341
2126.5	0.02393
2126	0.02382
2125.5	0.02398
2125	0.02383
2124.5	0.02384
2124	0.0238
2123.5	0.02386
2123	0.02312
2122.5	0.02272
2122	0.02282
2121.5	0.02265
2121	0.02241
2120.5	0.02216
2120	0.02168
2119.5	0.02232
2119	0.02287
2118.5	0.02261
2118	0.02181
2117.5	0.02223
2117	0.02238
2116.5	0.02244
2116	0.02258
2115.5	0.02308
2115	0.02372
2114.5	0.02432
2114	0.02426
2113.5	0.0246
2113	0.02509
2112.5	0.02449
2112	0.02437
2111.5	0.02469
2111	0.0247
2110.5	0.02426
2110	0.02411
2109.5	0.02396
2109	0.02427
2108.5	0.02382
2108	0.02413
2107.5	0.0245
2107	0.02442
2106.5	0.0238
2106	0.02392
2105.5	0.02411
2105	0.02354
2104.5	0.02418
2104	0.02393
2103.5	0.024
2103	0.02444
2102.5	0.0241
2102	0.02446
2101.5	0.02417
2101	0.02456
2100.5	0.02514
2100	0.02504
2099.5	0.02503
2099	0.02494
2098.5	0.02588
2098	0.02601
2097.5	0.02481
2097	0.02465
2096.5	0.02427
2096	0.02491
2095.5	0.02378
2095	0.02373
2094.5	0.02349
2094	0.02355
2093.5	0.02399
2093	0.02419
2092.5	0.02371
2092	0.02346
2091.5	0.02337
2091	0.02351
2090.5	0.02346
2090	0.02329
2089.5	0.02307
2089	0.02369
2088.5	0.02387
2088	0.02359
2087.5	0.02373
2087	0.0238
2086.5	0.02342
2086	0.02321
2085.5	0.02357
2085	0.02368
2084.5	0.02342
2084	0.02367
2083.5	0.02363
2083	0.02403
2082.5	0.02368
2082	0.02408
2081.5	0.02414
2081	0.02388
2080.5	0.02375
2080	0.02363
2079.5	0.02397
2079	0.02392
2078.5	0.02366
2078	0.02411
2077.5	0.02435
2077	0.02417
2076.5	0.02412
2076	0.02385
2075.5	0.02406
2075	0.02448
2074.5	0.02434
2074	0.0248
2073.5	0.02497
2073	0.025
2072.5	0.02463
2072	0.02398
2071.5	0.02412
2071	0.02354
2070.5	0.02351
2070	0.02333
2069.5	0.0232
2069	0.02353
2068.5	0.02369
2068	0.02387
2067.5	0.02392
2067	0.02324
2066.5	0.02367
2066	0.02336
2065.5	0.02377
2065	0.02394
2064.5	0.02402
2064	0.02467
2063.5	0.02516
2063	0.02494
2062.5	0.02453
2062	0.02433
2061.5	0.02393
2061	0.02368
2060.5	0.02334
2060	0.02263
2059.5	0.02289
2059	0.02284
2058.5	0.02296
2058	0.02321
2057.5	0.02308
2057	0.02355
2056.5	0.02399
2056	0.02383
2055.5	0.02379
2055	0.02259
2054.5	0.02244
2054	0.02257
2053.5	0.02294
2053	0.02346
2052.5	0.02297
2052	0.02379
2051.5	0.02384
2051	0.02419
2050.5	0.02414
2050	0.02473
2049.5	0.02508
2049	0.02506
2048.5	0.02487
2048	0.0245
2047.5	0.02412
2047	0.02433
2046.5	0.02335
2046	0.02261
2045.5	0.02283
2045	0.02239
2044.5	0.02331
2044	0.02306
2043.5	0.02319
2043	0.02359
2042.5	0.02411
2042	0.02396
2041.5	0.02348
2041	0.02388
2040.5	0.02414
2040	0.02394
2039.5	0.02394
2039	0.02466
2038.5	0.02513
2038	0.02596
2037.5	0.02539
2037	0.02521
2036.5	0.02428
2036	0.02416
2035.5	0.02426
2035	0.02404
2034.5	0.02376
2034	0.02415
2033.5	0.02429
2033	0.02497
2032.5	0.02485
2032	0.02517
2031.5	0.02498
2031	0.02494
2030.5	0.02479
2030	0.02529
2029.5	0.02487
2029	0.02482
2028.5	0.02469
2028	0.02421
2027.5	0.02485
2027	0.02488
2026.5	0.02479
2026	0.02485
2025.5	0.0252
2025	0.0257
2024.5	0.02516
2024	0.02556
2023.5	0.02557
2023	0.02627
2022.5	0.02593
2022	0.02569
2021.5	0.02619
2021	0.02568
2020.5	0.02614
2020	0.02694
2019.5	0.02691
2019	0.02728
2018.5	0.0279
2018	0.02805
2017.5	0.02781
2017	0.02781
2016.5	0.02784
2016	0.02769
2015.5	0.02732
2015	0.02718
2014.5	0.02733
2014	0.02707
2013.5	0.0265
2013	0.02727
2012.5	0.02794
2012	0.02814
2011.5	0.02793
2011	0.02816
2010.5	0.0283
2010	0.02867
2009.5	0.02863
2009	0.02905
2008.5	0.02949
2008	0.03009
2007.5	0.02984
2007	0.03043
2006.5	0.03044
2006	0.03023
2005.5	0.02983
2005	0.02958
2004.5	0.02946
2004	0.02946
2003.5	0.02908
2003	0.02936
2002.5	0.02993
2002	0.03042
2001.5	0.03091
2001	0.03053
2000.5	0.03089
2000	0.03082
1999.5	0.0306
1999	0.03021
1998.5	0.03035
1998	0.03098
1997.5	0.03062
1997	0.03079
1996.5	0.03111
1996	0.03138
1995.5	0.0312
1995	0.03095
1994.5	0.03143
1994	0.03143
1993.5	0.03076
1993	0.03105
1992.5	0.03125
1992	0.03124
1991.5	0.03114
1991	0.03074
1990.5	0.03117
1990	0.03121
1989.5	0.03115
1989	0.0313
1988.5	0.03181
1988	0.03196
1987.5	0.03228
1987	0.03165
1986.5	0.03161
1986	0.03151
1985.5	0.03112
1985	0.03155
1984.5	0.03144
1984	0.03201
1983.5	0.03227
1983	0.03202
1982.5	0.03233
1982	0.03239
1981.5	0.03287
1981	0.03343
1980.5	0.03359
1980	0.03435
1979.5	0.03439
1979	0.03481
1978.5	0.03456
1978	0.03395
1977.5	0.03355
1977	0.03358
1976.5	0.03374
1976	0.03375
1975.5	0.03393
1975	0.03404
1974.5	0.03394
1974	0.03398
1973.5	0.03365
1973	0.03333
1972.5	0.03329
1972	0.03311
1971.5	0.03204
1971	0.03171
1970.5	0.0316
1970	0.03225
1969.5	0.03245
1969	0.03202
1968.5	0.03202
1968	0.03246
1967.5	0.03263
1967	0.0323
1966.5	0.03211
1966	0.03242
1965.5	0.03244
1965	0.03239
1964.5	0.03278
1964	0.03216
1963.5	0.03209
1963	0.03163
1962.5	0.03167
1962	0.03219
1961.5	0.03182
1961	0.03268
1960.5	0.03271
1960	0.03367
1959.5	0.03385
1959	0.0337
1958.5	0.03328
1958	0.03385
1957.5	0.03385
1957	0.03298
1956.5	0.03315
1956	0.03295
1955.5	0.03315
1955	0.03299
1954.5	0.03313
1954	0.03322
1953.5	0.03384
1953	0.03343
1952.5	0.03345
1952	0.03365
1951.5	0.03353
1951	0.03392
1950.5	0.03322
1950	0.03344
1949.5	0.03405
1949	0.03413
1948.5	0.03387
1948	0.03339
1947.5	0.03296
1947	0.03299
1946.5	0.03372
1946	0.0331
1945.5	0.03267
1945	0.03316
1944.5	0.0341
1944	0.03359
1943.5	0.03333
1943	0.03388
1942.5	0.03347
1942	0.03385
1941.5	0.03346
1941	0.03372
1940.5	0.03466
1940	0.0342
1939.5	0.03432
1939	0.03419
1938.5	0.0342
1938	0.03457
1937.5	0.03362
1937	0.03264
1936.5	0.03271
1936	0.03286
1935.5	0.03251
1935	0.03229
1934.5	0.03185
1934	0.03235
1933.5	0.03285
1933	0.03222
1932.5	0.03196
1932	0.03181
1931.5	0.03154
1931	0.03183
1930.5	0.03128
1930	0.03086
1929.5	0.0309
1929	0.03058
1928.5	0.0308
1928	0.03091
1927.5	0.03062
1927	0.03112
1926.5	0.03169
1926	0.03178
1925.5	0.03228
1925	0.03269
1924.5	0.03227
1924	0.0324
1923.5	0.03219
1923	0.03172
1922.5	0.03179
1922	0.0311
1921.5	0.03098
1921	0.03064
1920.5	0.03133
1920	0.03104
1919.5	0.03138
1919	0.03088
1918.5	0.0313
1918	0.03219
1917.5	0.03241
1917	0.03208
1916.5	0.03159
1916	0.03086
1915.5	0.03057
1915	0.03096
1914.5	0.03059
1914	0.03094
1913.5	0.03103
1913	0.03085
1912.5	0.03125
1912	0.03171
1911.5	0.03188
1911	0.03162
1910.5	0.03082
1910	0.03061
1909.5	0.03065
1909	0.03068
1908.5	0.0293
1908	0.02947
1907.5	0.02986
1907	0.03002
1906.5	0.03043
1906	0.02999
1905.5	0.03033
1905	0.02971
1904.5	0.02914
1904	0.02951
1903.5	0.02946
1903	0.0295
1902.5	0.02918
1902	0.02889
1901.5	0.02892
1901	0.02885
1900.5	0.02832
1900	0.03088
1899.5	0.03071
1899	0.03023
1898.5	0.02976
1898	0.0294
1897.5	0.02971
1897	0.02977
1896.5	0.02905
1896	0.02889
1895.5	0.02875
1895	0.02878
1894.5	0.02883
1894	0.02828
1893.5	0.02855
1893	0.02843
1892.5	0.02827
1892	0.02866
1891.5	0.02801
1891	0.02819
1890.5	0.02817
1890	0.02781
1889.5	0.02766
1889	0.02784
1888.5	0.02766
1888	0.02752
1887.5	0.02749
1887	0.02745
1886.5	0.02749
1886	0.02724
1885.5	0.02719
1885	0.02736
1884.5	0.02712
1884	0.02739
1883.5	0.02766
1883	0.02763
1882.5	0.0274
1882	0.02719
1881.5	0.02728
1881	0.02699
1880.5	0.0264
1880	0.02637
1879.5	0.02627
1879	0.0259
1878.5	0.0254
1878	0.02539
1877.5	0.02513
1877	0.02468
1876.5	0.02474
1876	0.02467
1875.5	0.02418
1875	0.0241
1874.5	0.02423
1874	0.02401
1873.5	0.02376
1873	0.02381
1872.5	0.0237
1872	0.02356
1871.5	0.02352
1871	0.02366
1870.5	0.02368
1870	0.02371
1869.5	0.02325
1869	0.02339
1868.5	0.02328
1868	0.02328
1867.5	0.02307
1867	0.02295
1866.5	0.02284
1866	0.02261
1865.5	0.02277
1865	0.02253
1864.5	0.02226
1864	0.02207
1863.5	0.02193
1863	0.0221
1862.5	0.02205
1862	0.02178
1861.5	0.02191
1861	0.02199
1860.5	0.02216
1860	0.0218
1859.5	0.02183
1859	0.02175
1858.5	0.02177
1858	0.02175
1857.5	0.02192
1857	0.02209
1856.5	0.02219
1856	0.0223
1855.5	0.02233
1855	0.02227
1854.5	0.02198
1854	0.02184
1853.5	0.02173
1853	0.02178
1852.5	0.02177
1852	0.0217
1851.5	0.02159
1851	0.0216
1850.5	0.02166
1850	0.0217
1849.5	0.0219
1849	0.02169
1848.5	0.02213
1848	0.02199
1847.5	0.02213
1847	0.02223
1846.5	0.0224
1846	0.02249
1845.5	0.02249
1845	0.0226
1844.5	0.02272
1844	0.02265
1843.5	0.02295
1843	0.02297
1842.5	0.02308
1842	0.02317
1841.5	0.02335
1841	0.02342
1840.5	0.02365
1840	0.02382
1839.5	0.02416
1839	0.02429
1838.5	0.02445
1838	0.02471
1837.5	0.02506
1837	0.02495
1836.5	0.02489
1836	0.02498
1835.5	0.02512
1835	0.02512
1834.5	0.02512
1834	0.02544
1833.5	0.02575
1833	0.02587
1832.5	0.02601
1832	0.02621
1831.5	0.02629
1831	0.02664
1830.5	0.02687
1830	0.02735
1829.5	0.02749
1829	0.02793
1828.5	0.02818
1828	0.02848
1827.5	0.02892
1827	0.02894
1826.5	0.02926
1826	0.02957
1825.5	0.02988
1825	0.03038
1824.5	0.03052
1824	0.03072
1823.5	0.0312
1823	0.03178
1822.5	0.03192
1822	0.03241
1821.5	0.0327
1821	0.03298
1820.5	0.03352
1820	0.03391
1819.5	0.03408
1819	0.03425
1818.5	0.0345
1818	0.03495
1817.5	0.03519
1817	0.03537
1816.5	0.0355
1816	0.03589
1815.5	0.03609
1815	0.03615
1814.5	0.03649
1814	0.03666
1813.5	0.03662
1813	0.03699
1812.5	0.03726
1812	0.03751
1811.5	0.03769
1811	0.03779
1810.5	0.03798
1810	0.03802
1809.5	0.03803
1809	0.03822
1808.5	0.0384
1808	0.03839
1807.5	0.03823
1807	0.03834
1806.5	0.03842
1806	0.0384
1805.5	0.03827
1805	0.03819
1804.5	0.03812
1804	0.03821
1803.5	0.0381
1803	0.0381
1802.5	0.03808
1802	0.03807
1801.5	0.03799
1801	0.0379
1800.5	0.03758
1800	0.03767
1799.5	0.03761
1799	0.03769
1798.5	0.03772
1798	0.03764
1797.5	0.03772
1797	0.0378
1796.5	0.03781
1796	0.03771
1795.5	0.03765
1795	0.03776
1794.5	0.0378
1794	0.03776
1793.5	0.0376
1793	0.03768
1792.5	0.03781
1792	0.03782
1791.5	0.03785
1791	0.038
1790.5	0.03806
1790	0.03824
1789.5	0.03842
1789	0.03862
1788.5	0.03881
1788	0.0391
1787.5	0.03932
1787	0.03965
1786.5	0.03987
1786	0.04003
1785.5	0.04036
1785	0.0406
1784.5	0.04086
1784	0.04124
1783.5	0.04156
1783	0.04201
1782.5	0.04239
1782	0.04277
1781.5	0.04343
1781	0.04387
1780.5	0.0443
1780	0.04489
1779.5	0.04536
1779	0.04592
1778.5	0.04641
1778	0.04708
1777.5	0.04772
1777	0.0485
1776.5	0.04915
1776	0.05003
1775.5	0.0508
1775	0.05157
1774.5	0.0524
1774	0.05328
1773.5	0.05428
1773	0.05516
1772.5	0.05591
1772	0.05676
1771.5	0.05767
1771	0.05862
1770.5	0.05953
1770	0.06045
1769.5	0.06158
1769	0.06259
1768.5	0.06375
1768	0.06475
1767.5	0.06581
1767	0.06686
1766.5	0.06782
1766	0.06878
1765.5	0.06959
1765	0.07039
1764.5	0.07139
1764	0.0723
1763.5	0.07322
1763	0.07412
1762.5	0.07518
1762	0.07614
1761.5	0.07702
1761	0.07778
1760.5	0.07839
1760	0.07926
1759.5	0.07994
1759	0.08046
1758.5	0.08112
1758	0.08169
1757.5	0.08229
1757	0.08274
1756.5	0.08295
1756	0.08324
1755.5	0.08363
1755	0.08381
1754.5	0.08385
1754	0.08399
1753.5	0.08402
1753	0.08422
1752.5	0.08439
1752	0.08445
1751.5	0.0846
1751	0.08473
1750.5	0.08469
1750	0.08483
1749.5	0.08465
1749	0.08467
1748.5	0.08462
1748	0.08456
1747.5	0.08461
1747	0.08453
1746.5	0.08452
1746	0.08459
1745.5	0.08467
1745	0.08482
1744.5	0.08497
1744	0.0852
1743.5	0.08533
1743	0.08563
1742.5	0.08583
1742	0.08592
1741.5	0.08606
1741	0.08623
1740.5	0.0865
1740	0.08677
1739.5	0.08699
1739	0.08726
1738.5	0.08747
1738	0.08757
1737.5	0.08776
1737	0.08795
1736.5	0.08812
1736	0.0883
1735.5	0.08853
1735	0.08884
1734.5	0.08903
1734	0.08901
1733.5	0.08907
1733	0.08927
1732.5	0.08938
1732	0.08942
1731.5	0.08936
1731	0.08935
1730.5	0.08931
1730	0.08936
1729.5	0.0894
1729	0.08932
1728.5	0.0893
1728	0.08919
1727.5	0.08899
1727	0.08892
1726.5	0.08857
1726	0.08839
1725.5	0.08814
1725	0.08776
1724.5	0.0875
1724	0.08726
1723.5	0.087
1723	0.08669
1722.5	0.08631
1722	0.08606
1721.5	0.08589
1721	0.08575
1720.5	0.08542
1720	0.08513
1719.5	0.0849
1719	0.08465
1718.5	0.08446
1718	0.08402
1717.5	0.08377
1717	0.08349
1716.5	0.08326
1716	0.08299
1715.5	0.0827
1715	0.08243
1714.5	0.08219
1714	0.08186
1713.5	0.08167
1713	0.08146
1712.5	0.08121
1712	0.08104
1711.5	0.08085
1711	0.08065
1710.5	0.08049
1710	0.08028
1709.5	0.08012
1709	0.07998
1708.5	0.07968
1708	0.07953
1707.5	0.07935
1707	0.0791
1706.5	0.07887
1706	0.07849
1705.5	0.0783
1705	0.07809
1704.5	0.07775
1704	0.07757
1703.5	0.07718
1703	0.07693
1702.5	0.07662
1702	0.07648
1701.5	0.07627
1701	0.07608
1700.5	0.07578
1700	0.07582
1699.5	0.06946
1699	0.06911
1698.5	0.06872
1698	0.06887
1697.5	0.06878
1697	0.06836
1696.5	0.06858
1696	0.06905
1695.5	0.06879
1695	0.06892
1694.5	0.06959
1694	0.0699
1693.5	0.07061
1693	0.07219
1692.5	0.07269
1692	0.07299
1691.5	0.07391
1691	0.07397
1690.5	0.07511
1690	0.07571
1689.5	0.07666
1689	0.0778
1688.5	0.07842
1688	0.07868
1687.5	0.07867
1687	0.0788
1686.5	0.07888
1686	0.07957
1685.5	0.08035
1685	0.08106
1684.5	0.08153
1684	0.08211
1683.5	0.08243
1683	0.0825
1682.5	0.0826
1682	0.083
1681.5	0.08382
1681	0.08436
1680.5	0.08484
1680	0.0855
1679.5	0.08578
1679	0.08674
1678.5	0.08722
1678	0.08743
1677.5	0.08722
1677	0.08755
1676.5	0.08773
1676	0.08781
1675.5	0.088
1675	0.08825
1674.5	0.0887
1674	0.08884
1673.5	0.08915
1673	0.08901
1672.5	0.08861
1672	0.08837
1671.5	0.08888
1671	0.08936
1670.5	0.08958
1670	0.09001
1669.5	0.09011
1669	0.0906
1668.5	0.09054
1668	0.09067
1667.5	0.09061
1667	0.09084
1666.5	0.09107
1666	0.09131
1665.5	0.09073
1665	0.09037
1664.5	0.08992
1664	0.08941
1663.5	0.08908
1663	0.08841
1662.5	0.08776
1662	0.08729
1661.5	0.08666
1661	0.08584
1660.5	0.08486
1660	0.08324
1659.5	0.08225
1659	0.08203
1658.5	0.08169
1658	0.08103
1657.5	0.08011
1657	0.07939
1656.5	0.0787
1656	0.07828
1655.5	0.07726
1655	0.07619
1654.5	0.07595
1654	0.07546
1653.5	0.07528
1653	0.07487
1652.5	0.0744
1652	0.07379
1651.5	0.07348
1651	0.07312
1650.5	0.07301
[truncated: 2,901 more rows]

## Sheet: SmF3
2500	0.09628		SmF3
2499.5	0.07969
2499	0.13499
2498.5	0.06768
2498	0.06293
2497.5	0.07844
2497	0.09068
2496.5	0.12107
2496	0.14214
2495.5	0.08805
2495	0.04125
2494.5	0.00869
2494	0.05
2493.5	0.06298
2493	0.04788
2492.5	0.02939
2492	0.02883
2491.5	0.06137
2491	0.15039
2490.5	0.1322
2490	0.10544
2489.5	0.08909
2489	0.10038
2488.5	0.12797
2488	0.09642
2487.5	0.12361
2487	0.07835
2486.5	0.13177
2486	0.10736
2485.5	0.09347
2485	0.04653
2484.5	0.03073
2484	-0.00732
2483.5	0.02938
2483	0.02796
2482.5	0.03713
2482	0.01932
2481.5	0.04345
2481	0.03847
2480.5	0.07943
2480	0.06254
2479.5	0.05783
2479	0.0443
2478.5	0.05517
2478	0.04678
2477.5	0.10961
2477	0.10601
2476.5	0.13368
2476	0.13178
2475.5	0.13462
2475	0.09039
2474.5	0.02673
2474	0.01014
2473.5	0.01362
2473	0.07128
2472.5	0.0954
2472	0.06175
2471.5	0.03739
2471	0.03168
2470.5	0.01495
2470	0.07541
2469.5	0.07969
2469	0.08437
2468.5	0.06207
2468	0.02613
2467.5	0.06518
2467	0.07237
2466.5	0.06644
2466	0.08451
2465.5	0.09447
2465	0.10232
2464.5	0.1172
2464	0.09235
2463.5	0.08928
2463	0.04251
2462.5	0.04859
2462	0.03487
2461.5	0.0662
2461	0.06562
2460.5	0.1167
2460	0.10008
2459.5	0.12712
2459	0.14253
2458.5	0.07452
2458	0.06938
2457.5	0.03252
2457	0.0622
2456.5	0.03612
2456	0.04291
2455.5	0.02894
2455	0.01758
2454.5	0.03184
2454	0.02075
2453.5	0.02465
2453	0.0366
2452.5	0.06199
2452	0.07667
2451.5	0.07303
2451	0.05993
2450.5	0.04776
2450	0.05448
2449.5	0.05966
2449	0.05518
2448.5	0.06543
2448	0.06302
2447.5	0.03803
2447	0.03428
2446.5	0.0719
2446	0.0377
2445.5	0.02842
2445	0.01556
2444.5	0.03593
2444	0.03812
2443.5	0.0156
2443	0.04009
2442.5	0.04016
2442	0.06591
2441.5	0.07048
2441	0.07369
2440.5	0.05141
2440	0.05726
2439.5	0.05214
2439	0.05868
2438.5	0.03754
2438	0.04492
2437.5	0.07329
2437	0.05147
2436.5	0.06454
2436	0.05944
2435.5	0.06892
2435	0.07227
2434.5	0.03244
2434	0.02928
2433.5	0.00989
2433	-0.02088
2432.5	-0.00193
2432	0.01852
2431.5	0.05976
2431	0.0634
2430.5	0.0711
2430	0.04842
2429.5	0.05294
2429	0.02093
2428.5	0.02168
2428	0.02344
2427.5	0.03079
2427	0.02827
2426.5	0.02295
2426	0.02125
2425.5	0.02451
2425	0.05459
2424.5	0.06275
2424	0.05409
2423.5	0.04275
2423	0.04066
2422.5	0.03159
2422	0.04828
2421.5	0.02871
2421	0.01247
2420.5	0.00242
2420	0.03172
2419.5	0.03707
2419	0.06204
2418.5	0.04138
2418	0.04099
2417.5	0.02813
2417	0.02248
2416.5	0.03486
2416	0.02302
2415.5	-0.00759
2415	0.00861
2414.5	0.01894
2414	0.05103
2413.5	0.04656
2413	0.03221
2412.5	0.03462
2412	0.02363
2411.5	0.0337
2411	0.04747
2410.5	0.05539
2410	0.04221
2409.5	0.03023
2409	0.02676
2408.5	0.04245
2408	0.02125
2407.5	0.02352
2407	0.03769
2406.5	0.04502
2406	0.03167
2405.5	-0.00844
2405	-0.01515
2404.5	0.00226
2404	0.02134
2403.5	0.04304
2403	0.06202
2402.5	0.06806
2402	0.04104
2401.5	0.0452
2401	0.03268
2400.5	0.0308
2400	0.01471
2399.5	0.00926
2399	0.00193
2398.5	0.00658
2398	0.01996
2397.5	0.03536
2397	0.02642
2396.5	0.02135
2396	0.00349
2395.5	-0.00132
2395	-0.01445
2394.5	0.01687
2394	0.01074
2393.5	0.02072
2393	0.03369
2392.5	0.01191
2392	0.04122
2391.5	0.02221
2391	0.02227
2390.5	0.01916
2390	0.02956
2389.5	0.01771
2389	0.01504
2388.5	0.0042
2388	0.00525
2387.5	0.00326
2387	0.01798
2386.5	0.05483
2386	0.05561
2385.5	0.06079
2385	0.02627
2384.5	0.01238
2384	0.01137
2383.5	0.01765
2383	0.03095
2382.5	0.02496
2382	0.02616
2381.5	0.04058
2381	0.04049
2380.5	0.05965
2380	0.04325
2379.5	0.03727
2379	0.0298
2378.5	0.0269
2378	0.02333
2377.5	0.01556
2377	0.00801
2376.5	0.00531
2376	-0.00566
2375.5	0.00871
2375	0.00833
2374.5	0.02079
2374	0.00856
2373.5	0.01384
2373	0.02141
2372.5	0.0104
2372	0.0138
2371.5	0.00584
2371	0.01596
2370.5	0.01701
2370	0.02566
2369.5	0.03154
2369	0.03467
2368.5	0.03495
2368	0.02788
2367.5	0.0359
2367	0.02846
2366.5	0.02795
2366	0.03058
2365.5	0.04362
2365	0.0558
2364.5	0.05539
2364	0.05081
2363.5	0.03571
2363	0.04611
2362.5	0.03823
2362	0.0266
2361.5	0.02543
2361	0.02297
2360.5	0.01933
2360	0.01672
2359.5	0.02161
2359	0.02932
2358.5	0.03591
2358	0.02782
2357.5	0.02343
2357	0.02268
2356.5	0.01391
2356	0.00524
2355.5	-0.00544
2355	-0.000595989
2354.5	0.00882
2354	0.03468
2353.5	0.02299
2353	0.02858
2352.5	0.02567
2352	0.02398
2351.5	0.02912
2351	0.03319
2350.5	0.03178
2350	0.03596
2349.5	0.02455
2349	0.02307
2348.5	0.02311
2348	0.00919
2347.5	0.01278
2347	0.01023
2346.5	0.00632
2346	0.00786
2345.5	0.01548
2345	0.01896
2344.5	0.01615
2344	0.02907
2343.5	0.03478
2343	0.02803
2342.5	0.01178
2342	0.01599
2341.5	0.01998
2341	0.0234
2340.5	0.01882
2340	0.00684
2339.5	0.01182
2339	0.00478
2338.5	0.01529
2338	0.00939
2337.5	0.01098
2337	0.01289
2336.5	0.00868
2336	0.01004
2335.5	0.02309
2335	0.04663
2334.5	0.04175
2334	0.03349
2333.5	0.01776
2333	0.01527
2332.5	0.01519
2332	0.01938
2331.5	0.01333
2331	0.01493
2330.5	0.00214
2330	0.01503
2329.5	0.02328
2329	0.04361
2328.5	0.03732
2328	0.03985
2327.5	0.03789
2327	0.03433
2326.5	0.01751
2326	0.0094
2325.5	0.0082
2325	0.02013
2324.5	0.03375
2324	0.03546
2323.5	0.03401
2323	0.02419
2322.5	0.02268
2322	0.01865
2321.5	0.00776
2321	0.01583
2320.5	0.000261147
2320	0.00761
2319.5	0.01196
2319	0.02647
2318.5	0.0342
2318	0.0469
2317.5	0.04486
2317	0.03829
2316.5	0.03026
2316	0.01351
2315.5	0.02267
2315	0.01742
2314.5	0.02481
2314	0.02517
2313.5	0.03121
2313	0.03729
2312.5	0.03395
2312	0.02786
2311.5	0.03444
2311	0.02003
2310.5	0.01422
2310	0.0087
2309.5	0.02129
2309	0.02607
2308.5	0.01722
2308	0.02139
2307.5	0.01816
2307	0.02494
2306.5	0.03104
2306	0.03217
2305.5	0.03934
2305	0.0327
2304.5	0.02314
2304	0.01654
2303.5	0.03065
2303	0.03275
2302.5	0.0405
2302	0.03166
2301.5	0.0242
2301	0.02491
2300.5	0.03014
2300	0.03124
2299.5	0.03913
2299	0.04079
2298.5	0.05973
2298	0.05439
2297.5	0.05263
2297	0.03987
2296.5	0.03625
2296	0.03245
2295.5	0.03646
2295	0.03234
2294.5	0.04481
2294	0.04419
2293.5	0.05014
2293	0.04938
2292.5	0.04338
2292	0.04349
2291.5	0.03298
2291	0.03431
2290.5	0.02492
2290	0.02109
2289.5	0.0189
2289	0.02696
2288.5	0.03314
2288	0.03816
2287.5	0.04149
2287	0.03722
2286.5	0.03914
2286	0.02679
2285.5	0.03045
2285	0.02482
2284.5	0.02418
2284	0.02182
2283.5	0.02722
2283	0.02937
2282.5	0.03673
2282	0.04617
2281.5	0.05147
2281	0.04445
2280.5	0.0397
2280	0.02783
2279.5	0.03197
2279	0.02766
2278.5	0.02375
2278	0.02902
2277.5	0.03757
2277	0.03639
2276.5	0.02978
2276	0.03356
2275.5	0.04647
2275	0.04866
2274.5	0.04121
2274	0.03456
2273.5	0.03427
2273	0.03891
2272.5	0.03842
2272	0.03958
2271.5	0.0361
2271	0.03575
2270.5	0.03721
2270	0.03157
2269.5	0.03817
2269	0.0361
2268.5	0.04172
2268	0.03684
2267.5	0.03248
2267	0.03612
2266.5	0.03162
2266	0.02369
2265.5	0.0219
2265	0.0331
2264.5	0.03825
2264	0.03874
2263.5	0.03449
2263	0.03908
2262.5	0.0346
2262	0.03269
2261.5	0.02756
2261	0.0337
2260.5	0.03365
2260	0.02804
2259.5	0.03719
2259	0.03854
2258.5	0.04215
2258	0.04208
2257.5	0.03788
2257	0.04448
2256.5	0.03705
2256	0.04506
2255.5	0.02919
2255	0.03666
2254.5	0.0278
2254	0.03706
2253.5	0.03818
2253	0.04624
2252.5	0.04582
2252	0.03991
2251.5	0.03541
2251	0.03771
2250.5	0.03813
2250	0.03471
2249.5	0.0357
2249	0.03614
2248.5	0.03617
2248	0.0428
2247.5	0.05289
2247	0.0495
2246.5	0.05138
2246	0.0346
2245.5	0.03536
2245	0.03219
2244.5	0.03282
2244	0.03458
2243.5	0.03004
2243	0.03681
2242.5	0.02983
2242	0.03804
2241.5	0.03785
2241	0.0323
2240.5	0.03074
2240	0.02471
2239.5	0.03272
2239	0.03483
2238.5	0.03281
2238	0.02936
2237.5	0.03538
2237	0.02906
2236.5	0.02632
2236	0.02941
2235.5	0.03154
2235	0.04521
2234.5	0.04781
2234	0.04566
2233.5	0.04499
2233	0.04169
2232.5	0.04764
2232	0.04709
2231.5	0.05079
2231	0.05497
2230.5	0.06279
2230	0.06028
2229.5	0.05898
2229	0.05303
2228.5	0.05216
2228	0.04259
2227.5	0.05067
2227	0.04905
2226.5	0.04924
2226	0.05177
2225.5	0.044
2225	0.03754
2224.5	0.03042
2224	0.04116
2223.5	0.04346
2223	0.04525
2222.5	0.04089
2222	0.0477
2221.5	0.04724
2221	0.05024
2220.5	0.04679
2220	0.0481
2219.5	0.05345
2219	0.06118
2218.5	0.05898
2218	0.06
2217.5	0.05511
2217	0.05232
2216.5	0.05655
2216	0.0529
2215.5	0.06025
2215	0.05305
2214.5	0.05832
2214	0.05437
2213.5	0.0562
2213	0.06123
2212.5	0.05008
2212	0.06058
2211.5	0.05399
2211	0.07155
2210.5	0.0541
2210	0.04804
2209.5	0.03792
2209	0.03649
2208.5	0.04362
2208	0.0437
2207.5	0.04721
2207	0.05091
2206.5	0.05855
2206	0.06141
2205.5	0.05792
2205	0.04692
2204.5	0.04942
2204	0.05624
2203.5	0.05629
2203	0.05169
2202.5	0.03897
2202	0.0439
2201.5	0.04457
2201	0.05113
2200.5	0.04317
2200	0.04735
2199.5	0.04027
2199	0.04322
2198.5	0.04353
2198	0.05498
2197.5	0.05748
2197	0.05176
2196.5	0.03959
2196	0.03101
2195.5	0.0275
2195	0.03641
2194.5	0.04563
2194	0.05593
2193.5	0.04346
2193	0.0389
2192.5	0.03552
2192	0.03419
2191.5	0.04114
2191	0.0401
2190.5	0.0465
2190	0.04208
2189.5	0.03542
2189	0.02678
2188.5	0.0303
2188	0.02373
2187.5	0.02163
2187	0.02544
2186.5	0.02776
2186	0.03108
2185.5	0.0393
2185	0.03602
2184.5	0.02543
2184	0.02097
2183.5	0.01535
2183	0.02897
2182.5	0.02437
2182	0.01733
2181.5	0.02288
2181	0.02327
2180.5	0.03062
2180	0.03094
2179.5	0.02997
2179	0.01795
2178.5	0.0145
2178	0.00232
2177.5	0.01125
2177	0.00951
2176.5	0.01325
2176	0.01885
2175.5	0.02493
2175	0.01816
2174.5	0.01818
2174	0.01018
2173.5	0.01765
2173	0.01787
2172.5	0.02026
2172	0.01254
2171.5	0.01708
2171	0.02295
2170.5	0.02181
2170	0.0293
2169.5	0.02364
2169	0.03315
2168.5	0.02847
2168	0.02201
2167.5	0.02204
2167	0.01989
2166.5	0.01915
2166	0.02917
2165.5	0.02559
2165	0.02627
2164.5	0.02494
2164	0.03393
2163.5	0.02027
2163	0
2162.5	0.0005375
2162	0.00406
2161.5	0.03375
2161	0.03496
2160.5	0.05079
2160	0.03642
2159.5	0.04167
2159	0.05005
2158.5	0.02683
2158	0.02503
2157.5	0.01579
2157	0.02702
2156.5	0.02022
2156	0.02951
2155.5	0.02172
2155	0.02416
2154.5	0.01982
2154	0.02617
2153.5	0.04345
2153	0.05581
2152.5	0.04819
2152	0.03399
2151.5	0.02584
2151	0.00424
2150.5	0.00271
2150	0.01523
2149.5	0.04008
2149	0.04771
2148.5	0.0271
2148	0.0211
2147.5	0.01726
2147	0.01317
2146.5	0.01665
2146	0.01858
2145.5	0.03571
2145	0.04837
2144.5	0.04842
2144	0.0367
2143.5	0.02317
2143	0.01934
2142.5	0.02551
2142	0.03812
2141.5	0.04846
2141	0.04178
2140.5	0.03443
2140	0.02359
2139.5	0.04606
2139	0.0513
2138.5	0.04794
2138	0.03241
2137.5	0.03337
2137	0.02905
2136.5	0.02494
2136	0.02555
2135.5	0.03802
2135	0.05096
2134.5	0.0533
2134	0.04525
2133.5	0.03263
2133	0.03848
2132.5	0.05017
2132	0.04692
2131.5	0.05036
2131	0.05078
2130.5	0.05319
2130	0.0413
2129.5	0.05014
2129	0.07562
2128.5	0.079
2128	0.06777
2127.5	0.05237
2127	0.06377
2126.5	0.06236
2126	0.06652
2125.5	0.06421
2125	0.05684
2124.5	0.05921
2124	0.04739
2123.5	0.05076
2123	0.04579
2122.5	0.05937
2122	0.06356
2121.5	0.06476
2121	0.06401
2120.5	0.05962
2120	0.06067
2119.5	0.04468
2119	0.03146
2118.5	0.03414
2118	0.04792
2117.5	0.04272
2117	0.04567
2116.5	0.05038
2116	0.04648
2115.5	0.05906
2115	0.05691
2114.5	0.056
2114	0.05347
2113.5	0.05856
2113	0.06886
2112.5	0.07372
2112	0.08649
2111.5	0.07089
2111	0.05964
2110.5	0.06042
2110	0.06319
2109.5	0.08683
2109	0.08979
2108.5	0.10366
2108	0.08363
2107.5	0.08264
2107	0.07992
2106.5	0.06305
2106	0.06578
2105.5	0.06695
2105	0.08742
2104.5	0.08696
2104	0.07627
2103.5	0.07283
2103	0.0671
2102.5	0.07891
2102	0.10135
2101.5	0.09892
2101	0.09851
2100.5	0.10267
2100	0.08727
2099.5	0.10197
2099	0.0795
2098.5	0.08289
2098	0.09244
2097.5	0.08564
2097	0.09429
2096.5	0.09342
2096	0.09106
2095.5	0.08493
2095	0.08016
2094.5	0.07793
2094	0.08843
2093.5	0.09574
2093	0.10078
2092.5	0.09103
2092	0.10374
2091.5	0.11699
2091	0.12755
2090.5	0.12411
2090	0.12536
2089.5	0.11383
2089	0.11069
2088.5	0.09021
2088	0.08545
2087.5	0.09832
2087	0.11524
2086.5	0.12294
2086	0.127
2085.5	0.11331
2085	0.12427
2084.5	0.14197
2084	0.16143
2083.5	0.14299
2083	0.12511
2082.5	0.14047
2082	0.15265
2081.5	0.16171
2081	0.14286
2080.5	0.13048
2080	0.11677
2079.5	0.10927
2079	0.13527
2078.5	0.1266
2078	0.14596
2077.5	0.12479
2077	0.13192
2076.5	0.11502
2076	0.13394
2075.5	0.13526
2075	0.14049
2074.5	0.13468
2074	0.1414
2073.5	0.16253
2073	0.17887
2072.5	0.16127
2072	0.15684
2071.5	0.15312
2071	0.1533
2070.5	0.13333
2070	0.1405
2069.5	0.14642
2069	0.17508
2068.5	0.14489
2068	0.14625
2067.5	0.13334
2067	0.16359
2066.5	0.17541
2066	0.1792
2065.5	0.17291
2065	0.18057
2064.5	0.18125
2064	0.17231
2063.5	0.17513
2063	0.16805
2062.5	0.1788
2062	0.17829
2061.5	0.18773
2061	0.19539
2060.5	0.19641
2060	0.20879
2059.5	0.20674
2059	0.18998
2058.5	0.20336
2058	0.20222
2057.5	0.216
2057	0.21392
2056.5	0.20008
2056	0.19503
2055.5	0.18319
2055	0.20217
2054.5	0.20449
2054	0.19596
2053.5	0.17898
2053	0.18172
2052.5	0.18511
2052	0.19444
2051.5	0.18915
2051	0.18657
2050.5	0.18879
2050	0.17758
2049.5	0.18278
2049	0.19699
2048.5	0.2076
2048	0.2394
2047.5	0.21482
2047	0.20378
2046.5	0.20608
2046	0.2259
2045.5	0.25147
2045	0.23665
2044.5	0.22641
2044	0.24094
2043.5	0.23453
2043	0.24944
2042.5	0.24955
2042	0.26671
2041.5	0.25961
2041	0.29932
2040.5	0.29201
2040	0.28779
2039.5	0.257
2039	0.24802
2038.5	0.24971
2038	0.26629
2037.5	0.27304
2037	0.28686
2036.5	0.27631
2036	0.25891
2035.5	0.2495
2035	0.24422
2034.5	0.26623
2034	0.2814
2033.5	0.29405
2033	0.29452
2032.5	0.27532
2032	0.26042
2031.5	0.25586
2031	0.24691
2030.5	0.271
2030	0.26722
2029.5	0.29237
2029	0.29357
2028.5	0.28207
2028	0.30314
2027.5	0.30873
2027	0.32327
2026.5	0.32339
2026	0.31222
2025.5	0.30166
2025	0.30673
2024.5	0.30497
2024	0.32263
2023.5	0.33373
2023	0.33377
2022.5	0.33247
2022	0.3325
2021.5	0.31837
2021	0.32133
2020.5	0.32969
2020	0.34033
2019.5	0.33514
2019	0.34089
2018.5	0.31683
2018	0.34764
2017.5	0.34571
2017	0.34368
2016.5	0.33607
2016	0.33645
2015.5	0.32937
2015	0.32226
2014.5	0.30386
2014	0.31159
2013.5	0.32414
2013	0.31895
2012.5	0.33264
2012	0.33594
2011.5	0.33105
2011	0.33018
2010.5	0.34591
2010	0.33754
2009.5	0.36024
2009	0.37008
2008.5	0.37647
2008	0.37997
2007.5	0.38733
2007	0.36267
2006.5	0.3614
2006	0.32698
2005.5	0.33425
2005	0.33041
2004.5	0.34375
2004	0.3384
2003.5	0.34352
2003	0.32726
2002.5	0.33769
2002	0.31241
2001.5	0.32472
2001	0.34897
2000.5	0.34232
2000	0.33103
1999.5	0.33083
1999	0.32984
1998.5	0.33217
1998	0.36007
1997.5	0.36686
1997	0.38221
1996.5	0.38965
1996	0.39491
1995.5	0.37967
1995	0.36332
1994.5	0.39241
1994	0.37247
1993.5	0.34582
1993	0.34004
1992.5	0.3509
1992	0.38488
1991.5	0.40481
1991	0.41541
1990.5	0.39519
1990	0.3812
1989.5	0.36235
1989	0.35463
1988.5	0.35481
1988	0.36497
1987.5	0.38984
1987	0.3969
1986.5	0.38522
1986	0.37387
1985.5	0.35449
1985	0.37848
1984.5	0.37488
1984	0.38984
1983.5	0.38563
1983	0.37466
1982.5	0.35928
1982	0.37445
1981.5	0.37594
1981	0.36599
1980.5	0.3697
1980	0.37146
1979.5	0.39523
1979	0.38871
1978.5	0.38123
1978	0.4004
1977.5	0.3593
1977	0.39561
1976.5	0.39047
1976	0.40138
1975.5	0.37816
1975	0.36576
1974.5	0.36058
1974	0.3518
1973.5	0.33304
1973	0.34529
1972.5	0.36221
1972	0.38977
1971.5	0.37678
1971	0.38453
1970.5	0.36129
1970	0.35905
1969.5	0.37124
1969	0.37848
1968.5	0.39606
1968	0.39826
1967.5	0.37168
1967	0.36248
1966.5	0.37199
1966	0.39495
1965.5	0.40676
1965	0.39091
1964.5	0.35392
1964	0.36746
1963.5	0.36996
1963	0.39922
1962.5	0.39378
1962	0.38182
1961.5	0.34666
1961	0.35559
1960.5	0.37936
1960	0.39144
1959.5	0.3917
1959	0.41151
1958.5	0.41261
1958	0.41167
1957.5	0.39387
1957	0.37336
1956.5	0.37328
1956	0.36911
1955.5	0.3759
1955	0.36701
1954.5	0.38278
1954	0.37661
1953.5	0.41356
1953	0.43637
1952.5	0.41514
1952	0.39494
1951.5	0.39911
1951	0.38645
1950.5	0.39175
1950	0.36885
1949.5	0.37782
1949	0.36676
1948.5	0.37235
1948	0.38963
1947.5	0.41111
1947	0.4225
1946.5	0.40653
1946	0.39531
1945.5	0.35452
1945	0.37738
1944.5	0.36176
1944	0.37744
1943.5	0.35004
1943	0.36384
1942.5	0.365
1942	0.37281
1941.5	0.35576
1941	0.36197
1940.5	0.3586
1940	0.39472
1939.5	0.42487
1939	0.39647
1938.5	0.38939
1938	0.35763
1937.5	0.40111
1937	0.37954
1936.5	0.37745
1936	0.34122
1935.5	0.35228
1935	0.34295
1934.5	0.36115
1934	0.35755
1933.5	0.37044
1933	0.37884
1932.5	0.37617
1932	0.39723
1931.5	0.36293
1931	0.34558
1930.5	0.31831
1930	0.35063
1929.5	0.37866
1929	0.37493
1928.5	0.35193
1928	0.34985
1927.5	0.36044
1927	0.3654
1926.5	0.36679
1926	0.3477
1925.5	0.36034
1925	0.37305
1924.5	0.35191
1924	0.3362
1923.5	0.31785
1923	0.31891
1922.5	0.34669
1922	0.35069
1921.5	0.3419
1921	0.34898
1920.5	0.35033
1920	0.35869
1919.5	0.35713
1919	0.31279
1918.5	0.32518
1918	0.31597
1917.5	0.32984
1917	0.31332
1916.5	0.30765
1916	0.31352
1915.5	0.29286
1915	0.30426
1914.5	0.31097
1914	0.29955
1913.5	0.29762
1913	0.2793
1912.5	0.26271
1912	0.28428
1911.5	0.30122
1911	0.33944
1910.5	0.33381
1910	0.31944
1909.5	0.30997
1909	0.29408
1908.5	0.28935
1908	0.28508
1907.5	0.29557
1907	0.31196
1906.5	0.29458
1906	0.27713
1905.5	0.26312
1905	0.27542
1904.5	0.27025
1904	0.2918
1903.5	0.26011
1903	0.2647
1902.5	0.25529
1902	0.26362
1901.5	0.2608
1901	0.27695
1900.5	0.2636
1900	0.27518
1899.5	0.27592
1899	0.27569
1898.5	0.25446
1898	0.24465
1897.5	0.24401
1897	0.24384
1896.5	0.24048
1896	0.24336
1895.5	0.22822
1895	0.23457
1894.5	0.23777
1894	0.25351
1893.5	0.2479
1893	0.24981
1892.5	0.2287
1892	0.21501
1891.5	0.21246
1891	0.21129
1890.5	0.21483
1890	0.21304
1889.5	0.22051
1889	0.22035
1888.5	0.21832
1888	0.21364
1887.5	0.20149
1887	0.20487
1886.5	0.21036
1886	0.2119
1885.5	0.2
1885	0.19937
1884.5	0.19174
1884	0.18945
1883.5	0.18593
1883	0.17921
1882.5	0.17498
1882	0.17667
1881.5	0.18105
1881	0.18476
1880.5	0.17966
1880	0.17525
1879.5	0.17013
1879	0.16219
1878.5	0.1672
1878	0.15814
1877.5	0.15117
1877	0.14083
1876.5	0.13538
1876	0.139
1875.5	0.13888
1875	0.1422
1874.5	0.13613
1874	0.13567
1873.5	0.13164
1873	0.1247
1872.5	0.12793
1872	0.11556
1871.5	0.11925
1871	0.1114
1870.5	0.1118
1870	0.10857
1869.5	0.1058
1869	0.10266
1868.5	0.1082
1868	0.10209
1867.5	0.10397
1867	0.10011
1866.5	0.10474
1866	0.10097
1865.5	0.09052
1865	0.09615
1864.5	0.09422
1864	0.10617
1863.5	0.09829
1863	0.0952
1862.5	0.09062
1862	0.09212
1861.5	0.09084
1861	0.08439
1860.5	0.08531
1860	0.08549
1859.5	0.08719
1859	0.08035
1858.5	0.07617
1858	0.07472
1857.5	0.07622
1857	0.07386
1856.5	0.07793
1856	0.07791
1855.5	0.0801
1855	0.08299
1854.5	0.0826
1854	0.08039
1853.5	0.07901
1853	0.08001
1852.5	0.08128
1852	0.086
1851.5	0.07892
1851	0.07656
1850.5	0.07141
1850	0.06975
1849.5	0.07338
1849	0.06792
1848.5	0.06588
1848	0.06224
1847.5	0.06546
1847	0.07167
1846.5	0.07261
1846	0.07607
1845.5	0.07132
1845	0.07235
1844.5	0.06457
1844	0.06782
1843.5	0.07145
1843	0.06983
1842.5	0.06633
1842	0.06361
1841.5	0.06734
1841	0.07349
1840.5	0.07017
1840	0.0686
1839.5	0.06376
1839	0.06724
1838.5	0.06343
1838	0.06245
1837.5	0.05918
1837	0.05993
1836.5	0.06431
1836	0.06241
1835.5	0.0595
1835	0.06067
1834.5	0.06451
1834	0.0639
1833.5	0.06084
1833	0.0594
1832.5	0.06154
1832	0.05549
1831.5	0.05164
1831	0.05444
1830.5	0.05604
1830	0.0599
1829.5	0.05496
1829	0.05252
1828.5	0.04613
1828	0.04211
1827.5	0.04258
1827	0.04045
1826.5	0.04528
1826	0.04633
1825.5	0.04691
1825	0.04016
1824.5	0.04161
1824	0.04195
1823.5	0.04241
1823	0.04464
1822.5	0.04133
1822	0.04407
1821.5	0.04118
1821	0.04151
1820.5	0.04197
1820	0.03464
1819.5	0.0326
1819	0.03072
1818.5	0.03735
1818	0.04422
1817.5	0.04697
1817	0.04595
1816.5	0.04902
1816	0.04578
1815.5	0.04773
1815	0.04283
1814.5	0.04528
1814	0.04137
1813.5	0.0454
1813	0.03896
1812.5	0.03622
1812	0.03645
1811.5	0.03593
1811	0.03384
1810.5	0.03976
1810	0.04147
1809.5	0.04792
1809	0.04767
1808.5	0.04501
1808	0.04124
1807.5	0.03834
1807	0.03702
1806.5	0.03552
1806	0.03227
1805.5	0.03837
1805	0.03858
1804.5	0.03997
1804	0.03611
1803.5	0.03719
1803	0.03789
1802.5	0.03367
1802	0.03669
1801.5	0.03264
1801	0.03415
1800.5	0.03118
1800	0.03262
1799.5	0.03492
1799	0.03658
1798.5	0.03884
1798	0.04161
1797.5	0.03988
1797	0.03732
1796.5	0.03781
1796	0.03662
1795.5	0.03543
1795	0.03252
1794.5	0.03809
1794	0.03714
1793.5	0.04083
1793	0.03614
1792.5	0.03744
1792	0.03431
1791.5	0.03174
1791	0.02826
1790.5	0.02523
1790	0.0261
1789.5	0.0252
1789	0.02888
1788.5	0.02726
1788	0.02794
1787.5	0.02683
1787	0.02941
1786.5	0.02898
1786	0.029
1785.5	0.02924
1785	0.03283
1784.5	0.0349
1784	0.03373
1783.5	0.03275
1783	0.0294
1782.5	0.02723
1782	0.02722
1781.5	0.02826
1781	0.03033
1780.5	0.0343
1780	0.03593
1779.5	0.03807
1779	0.02985
1778.5	0.02752
1778	0.02564
1777.5	0.03455
1777	0.03467
1776.5	0.03522
1776	0.03238
1775.5	0.03105
1775	0.0272
1774.5	0.02499
1774	0.02554
1773.5	0.02517
1773	0.02826
1772.5	0.02807
1772	0.02938
1771.5	0.02655
1771	0.02722
1770.5	0.02637
1770	0.02826
1769.5	0.02777
1769	0.02798
1768.5	0.02762
1768	0.02932
1767.5	0.02832
1767	0.02993
1766.5	0.02917
1766	0.02838
1765.5	0.02807
1765	0.02918
1764.5	0.03192
1764	0.03479
1763.5	0.03164
1763	0.02668
1762.5	0.02543
1762	0.02491
1761.5	0.02604
1761	0.02647
1760.5	0.02384
1760	0.02373
1759.5	0.02522
1759	0.02711
1758.5	0.02745
1758	0.02724
1757.5	0.0258
1757	0.02419
1756.5	0.02241
1756	0.02309
1755.5	0.02551
1755	0.02585
1754.5	0.02452
1754	0.02178
1753.5	0.02009
1753	0.02085
1752.5	0.02525
1752	0.0243
1751.5	0.02565
1751	0.02485
1750.5	0.02423
1750	0.02312
1749.5	0.02026
1749	0.02091
1748.5	0.02292
1748	0.02496
1747.5	0.02352
1747	0.02234
1746.5	0.02043
1746	0.02244
1745.5	0.02206
1745	0.02332
1744.5	0.02278
1744	0.02159
1743.5	0.02196
1743	0.0213
1742.5	0.02244
1742	0.02144
1741.5	0.02116
1741	0.01984
1740.5	0.02131
1740	0.0227
1739.5	0.02313
1739	0.02433
1738.5	0.02259
1738	0.02353
1737.5	0.0217
1737	0.02205
1736.5	0.02161
1736	0.02317
1735.5	0.02236
1735	0.02139
1734.5	0.02059
1734	0.02112
1733.5	0.01892
1733	0.01795
1732.5	0.01376
1732	0.01624
1731.5	0.01628
1731	0.01914
1730.5	0.01738
1730	0.01954
1729.5	0.01949
1729	0.01913
1728.5	0.02015
1728	0.01717
1727.5	0.01931
1727	0.01867
1726.5	0.01887
1726	0.01706
1725.5	0.01804
1725	0.02048
1724.5	0.01985
1724	0.02098
1723.5	0.01974
1723	0.01948
1722.5	0.01642
1722	0.01819
1721.5	0.01861
1721	0.01857
1720.5	0.02033
1720	0.01922
1719.5	0.02223
1719	0.01939
1718.5	0.02179
1718	0.02052
1717.5	0.01614
1717	0.01667
1716.5	0.01664
1716	0.01882
1715.5	0.01842
1715	0.02139
1714.5	0.02186
1714	0.02189
1713.5	0.02158
1713	0.02115
1712.5	0.02049
1712	0.01757
1711.5	0.01787
1711	0.01775
1710.5	0.0218
1710	0.02323
1709.5	0.02406
1709	0.0241
1708.5	0.0236
1708	0.01999
1707.5	0.01953
1707	0.01857
1706.5	0.02238
1706	0.01816
1705.5	0.01923
1705	0.01581
1704.5	0.017
1704	0.01843
1703.5	0.01984
1703	0.0198
1702.5	0.01981
1702	0.01901
1701.5	0.02178
1701	0.02489
1700.5	0.0238
1700	0.02458
1699.5	0.0248
1699	0.02492
1698.5	0.02681
1698	0.02596
1697.5	0.02574
1697	0.02382
1696.5	0.02555
1696	0.02424
1695.5	0.0249
1695	0.02568
1694.5	0.028
1694	0.0277
1693.5	0.02556
1693	0.02329
1692.5	0.02029
1692	0.02304
1691.5	0.02379
1691	0.02833
1690.5	0.02656
1690	0.02727
1689.5	0.02517
1689	0.02891
1688.5	0.02879
1688	0.02688
1687.5	0.02641
1687	0.02743
1686.5	0.0288
1686	0.02719
1685.5	0.02798
1685	0.02726
1684.5	0.02945
1684	0.02875
1683.5	0.02721
1683	0.02898
1682.5	0.03081
1682	0.03207
1681.5	0.03184
1681	0.03239
1680.5	0.03206
1680	0.03356
1679.5	0.03232
1679	0.03036
1678.5	0.0285
1678	0.03171
1677.5	0.03242
1677	0.03377
1676.5	0.03349
1676	0.0355
1675.5	0.03779
1675	0.03622
1674.5	0.03606
1674	0.03489
1673.5	0.03374
1673	0.03474
1672.5	0.0331
1672	0.03812
1671.5	0.03467
1671	0.03767
1670.5	0.03632
1670	0.03925
1669.5	0.04109
1669	0.04457
1668.5	0.04574
1668	0.04653
1667.5	0.04443
1667	0.04182
1666.5	0.04223
1666	0.04371
1665.5	0.04572
1665	0.04734
1664.5	0.05126
1664	0.04952
1663.5	0.05093
1663	0.04972
1662.5	0.05067
1662	0.04977
1661.5	0.05054
1661	0.05017
1660.5	0.05214
1660	0.05289
1659.5	0.05276
1659	0.05321
1658.5	0.05035
1658	0.04929
1657.5	0.04623
1657	0.04827
1656.5	0.04871
1656	0.05196
1655.5	0.05428
1655	0.05334
1654.5	0.05174
1654	0.05099
1653.5	0.0499
1653	0.05123
1652.5	0.05025
1652	0.05365
1651.5	0.05614
1651	0.05726
1650.5	0.05748
1650	0.05728
1649.5	0.05558
1649	0.0565
1648.5	0.05519
1648	0.05891
1647.5	0.05913
1647	0.06197
1646.5	0.06047
1646	0.05895
1645.5	0.06024
1645	0.0608
1644.5	0.06276
1644	0.05818
1643.5	0.05811
1643	0.06128
1642.5	0.06317
1642	0.06364
1641.5	0.06536
1641	0.06618
1640.5	0.06507
1640	0.0653
1639.5	0.06612
1639	0.06944
1638.5	0.06792
1638	0.07147
1637.5	0.07184
1637	0.07594
1636.5	0.0764
1636	0.07915
1635.5	0.0804
1635	0.08187
1634.5	0.0821
1634	0.08455
1633.5	0.08805
1633	0.08967
1632.5	0.0923
1632	0.09158
1631.5	0.0906
1631	0.09381
1630.5	0.09329
1630	0.0978
1629.5	0.09771
1629	0.10264
1628.5	0.10328
1628	0.10522
1627.5	0.10461
1627	0.10418
1626.5	0.10644
1626	0.10832
1625.5	0.11203
1625	0.11251
1624.5	0.11062
1624	0.10989
1623.5	0.11149
1623	0.11606
1622.5	0.11609
1622	0.12045
1621.5	0.12507
1621	0.12858
1620.5	0.13282
1620	0.13237
1619.5	0.13499
1619	0.13495
1618.5	0.13765
1618	0.13825
1617.5	0.14184
1617	0.14495
1616.5	0.14884
1616	0.1495
1615.5	0.15294
1615	0.15556
1614.5	0.15921
1614	0.16181
1613.5	0.16367
1613	0.16781
1612.5	0.16874
1612	0.17099
1611.5	0.17316
1611	0.17318
1610.5	0.17255
1610	0.17461
1609.5	0.1768
1609	0.18092
1608.5	0.1808
1608	0.1807
1607.5	0.182
1607	0.18602
1606.5	0.19137
1606	0.19759
1605.5	0.20063
1605	0.20327
1604.5	0.20587
1604	0.20862
1603.5	0.21114
1603	0.21046
1602.5	0.21221
1602	0.21802
1601.5	0.2261
1601	0.23178
1600.5	0.23422
1600	0.23512
1599.5	0.23611
1599	0.24082
1598.5	0.24526
1598	0.24963
1597.5	0.25119
1597	0.25671
1596.5	0.26143
1596	0.26445
1595.5	0.26625
1595	0.27048
1594.5	0.27653
1594	0.28141
1593.5	0.28747
1593	0.29162
1592.5	0.29338
1592	0.29425
1591.5	0.29605
1591	0.30043
1590.5	0.30043
1590	0.3022
1589.5	0.30362
1589	0.30365
1588.5	0.30395
1588	0.30159
1587.5	0.30238
1587	0.29959
1586.5	0.30224
1586	0.30091
1585.5	0.30031
1585	0.30117
1584.5	0.30159
1584	0.30248
1583.5	0.3051
1583	0.30566
1582.5	0.30719
1582	0.30934
1581.5	0.31366
1581	0.31512
1580.5	0.3185
1580	0.31628
1579.5	0.31906
1579	0.31928
1578.5	0.32365
1578	0.32639
1577.5	0.3275
1577	0.32992
1576.5	0.32957
1576	0.33325
1575.5	0.33266
1575	0.33387
1574.5	0.33168
1574	0.33461
1573.5	0.33784
1573	0.34116
1572.5	0.3433
1572	0.34434
1571.5	0.34389
1571	0.34313
1570.5	0.34284
1570	0.34269
1569.5	0.34498
1569	0.34483
1568.5	0.34557
1568	0.3425
1567.5	0.34061
1567	0.34209
1566.5	0.34393
1566	0.34683
1565.5	0.34964
1565	0.34928
1564.5	0.35176
1564	0.35547
1563.5	0.3586
1563	0.36159
1562.5	0.36531
1562	0.36711
1561.5	0.37019
1561	0.37183
1560.5	0.37544
1560	0.38028
1559.5	0.38138
1559	0.38598
1558.5	0.38825
1558	0.3943
1557.5	0.39974
1557	0.40127
1556.5	0.40483
1556	0.40311
1555.5	0.40348
1555	0.40611
1554.5	0.40526
1554	0.40801
1553.5	0.40603
1553	0.40675
1552.5	0.4087
1552	0.40841
1551.5	0.41026
1551	0.41077
1550.5	0.41105
1550	0.40717
1549.5	0.40133
1549	0.40108
1548.5	0.40126
1548	0.4079
1547.5	0.41002
1547	0.40927
1546.5	0.40844
1546	0.40895
1545.5	0.40985
1545	0.40894
1544.5	0.4063
1544	0.40625
1543.5	0.4086
1543	0.41092
1542.5	0.4158
1542	0.41683
1541.5	0.41744
1541	0.41914
1540.5	0.41739
1540	0.41898
1539.5	0.41935
1539	0.41947
1538.5	0.42201
1538	0.42724
1537.5	0.43506
1537	0.44031
1536.5	0.44185
1536	0.44392
1535.5	0.44609
1535	0.44703
1534.5	0.45156
1534	0.45376
1533.5	0.45996
1533	0.46503
1532.5	0.47356
1532	0.47818
1531.5	0.48195
1531	0.48805
1530.5	0.49199
1530	0.49554
1529.5	0.50181
1529	0.50631
1528.5	0.51096
1528	0.50902
1527.5	0.51194
1527	0.51631
1526.5	0.52207
1526	0.52811
1525.5	0.5329
1525	0.53362
1524.5	0.53498
1524	0.53749
1523.5	0.54378
1523	0.5485
1522.5	0.55317
1522	0.55827
1521.5	0.56103
1521	0.56003
1520.5	0.561
1520	0.55762
1519.5	0.55804
1519	0.56288
1518.5	0.56491
1518	0.56725
1517.5	0.56768
1517	0.57021
1516.5	0.57515
1516	0.57669
1515.5	0.57488
1515	0.5749
1514.5	0.57696
1514	0.58083
1513.5	0.5843
1513	0.58649
1512.5	0.58678
1512	0.5863
1511.5	0.58819
1511	0.59236
1510.5	0.59679
1510	0.60017
1509.5	0.60109
1509	0.60136
1508.5	0.60467
1508	0.61029
1507.5	0.61316
1507	0.61762
1506.5	0.62608
1506	0.62984
1505.5	0.62894
1505	0.62898
1504.5	0.63009
1504	0.63475
1503.5	0.63854
1503	0.64309
1502.5	0.64738
1502	0.65115
1501.5	0.6561
1501	0.65967
1500.5	0.66179
[truncated: 2,601 more rows]

## Sheet: Sm2O3
2500	0.03358		Sm2O3
2499.5	0.03213
2499	0.03445
2498.5	0.03324
2498	0.03325
2497.5	0.03352
2497	0.0326
2496.5	0.0318
2496	0.03121
2495.5	0.03065
2495	0.03107
2494.5	0.03351
2494	0.03081
2493.5	0.03301
2493	0.03347
2492.5	0.03299
2492	0.03293
2491.5	0.03016
2491	0.03026
2490.5	0.03042
2490	0.03342
2489.5	0.033
2489	0.03381
2488.5	0.03624
2488	0.03977
2487.5	0.04152
2487	0.04591
2486.5	0.04295
2486	0.04586
2485.5	0.045
2485	0.04195
2484.5	0.04136
2484	0.03952
2483.5	0.03738
2483	0.03717
2482.5	0.03606
2482	0.03736
2481.5	0.03779
2481	0.03835
2480.5	0.0397
2480	0.04123
2479.5	0.04167
2479	0.04221
2478.5	0.04495
2478	0.04497
2477.5	0.045
2477	0.04488
2476.5	0.04551
2476	0.04458
2475.5	0.04415
2475	0.04261
2474.5	0.04493
2474	0.04331
2473.5	0.0441
2473	0.04546
2472.5	0.04551
2472	0.04558
2471.5	0.04526
2471	0.04611
2470.5	0.04568
2470	0.04474
2469.5	0.0447
2469	0.04591
2468.5	0.0443
2468	0.04658
2467.5	0.04707
2467	0.04646
2466.5	0.04587
2466	0.04633
2465.5	0.04806
2465	0.04731
2464.5	0.04681
2464	0.04637
2463.5	0.0462
2463	0.04494
2462.5	0.04379
2462	0.0435
2461.5	0.04397
2461	0.04421
2460.5	0.04569
2460	0.0465
2459.5	0.04648
2459	0.04629
2458.5	0.04591
2458	0.04583
2457.5	0.04514
2457	0.0442
2456.5	0.04554
2456	0.04546
2455.5	0.04577
2455	0.046
2454.5	0.04628
2454	0.0461
2453.5	0.04572
2453	0.04332
2452.5	0.04328
2452	0.043
2451.5	0.04365
2451	0.0436
2450.5	0.04398
2450	0.04441
2449.5	0.04471
2449	0.04244
2448.5	0.04107
2448	0.04133
2447.5	0.04237
2447	0.04195
2446.5	0.04263
2446	0.04467
2445.5	0.04581
2445	0.04479
2444.5	0.04509
2444	0.04506
2443.5	0.04388
2443	0.04427
2442.5	0.04205
2442	0.04267
2441.5	0.04211
2441	0.0413
2440.5	0.04086
2440	0.04122
2439.5	0.03984
2439	0.03751
2438.5	0.04003
2438	0.03894
2437.5	0.03807
2437	0.03836
2436.5	0.03826
2436	0.03895
2435.5	0.03824
2435	0.03557
2434.5	0.03607
2434	0.03599
2433.5	0.03511
2433	0.03459
2432.5	0.03478
2432	0.03511
2431.5	0.03412
2431	0.03406
2430.5	0.03393
2430	0.03458
2429.5	0.03444
2429	0.03258
2428.5	0.03199
2428	0.03189
2427.5	0.0312
2427	0.03077
2426.5	0.02924
2426	0.02865
2425.5	0.02784
2425	0.02763
2424.5	0.02729
2424	0.0261
2423.5	0.02564
2423	0.02559
2422.5	0.02566
2422	0.02474
2421.5	0.02394
2421	0.02401
2420.5	0.02308
2420	0.0232
2419.5	0.02329
2419	0.0234
2418.5	0.024
2418	0.02464
2417.5	0.02497
2417	0.02442
2416.5	0.0254
2416	0.02332
2415.5	0.02386
2415	0.02452
2414.5	0.02466
2414	0.02549
2413.5	0.02464
2413	0.02359
2412.5	0.02336
2412	0.02187
2411.5	0.02069
2411	0.02023
2410.5	0.01908
2410	0.0202
2409.5	0.02126
2409	0.02098
2408.5	0.02145
2408	0.0223
2407.5	0.02349
2407	0.02321
2406.5	0.0208
2406	0.02206
2405.5	0.02239
2405	0.02357
2404.5	0.02214
2404	0.02265
2403.5	0.02324
2403	0.02446
2402.5	0.02363
2402	0.02313
2401.5	0.02285
2401	0.02321
2400.5	0.02315
2400	0.02274
2399.5	0.02363
2399	0.02355
2398.5	0.02374
2398	0.0258
2397.5	0.02697
2397	0.02689
2396.5	0.02471
2396	0.02483
2395.5	0.02517
2395	0.02517
2394.5	0.02455
2394	0.0246
2393.5	0.02594
2393	0.02615
2392.5	0.02673
2392	0.0266
2391.5	0.02587
2391	0.02511
2390.5	0.02487
2390	0.0262
2389.5	0.02544
2389	0.02503
2388.5	0.02452
2388	0.02582
2387.5	0.02622
2387	0.02558
2386.5	0.02558
2386	0.02715
2385.5	0.02652
2385	0.02641
2384.5	0.02569
2384	0.02531
2383.5	0.02555
2383	0.02376
2382.5	0.0236
2382	0.02334
2381.5	0.02243
2381	0.02196
2380.5	0.02247
2380	0.02301
2379.5	0.02209
2379	0.02238
2378.5	0.02137
2378	0.02186
2377.5	0.02173
2377	0.02083
2376.5	0.02164
2376	0.02092
2375.5	0.02146
2375	0.02083
2374.5	0.02007
2374	0.01932
2373.5	0.01839
2373	0.01769
2372.5	0.01786
2372	0.01803
2371.5	0.01761
2371	0.01732
2370.5	0.01765
2370	0.01746
2369.5	0.01688
2369	0.0157
2368.5	0.01481
2368	0.0144
2367.5	0.0135
2367	0.0132
2366.5	0.01272
2366	0.01109
2365.5	0.01147
2365	0.01091
2364.5	0.01054
2364	0.01058
2363.5	0.01058
2363	0.01006
2362.5	0.01032
2362	0.00974
2361.5	0.00952
2361	0.00875
2360.5	0.00787
2360	0.00752
2359.5	0.00711
2359	0.0073
2358.5	0.00709
2358	0.00681
2357.5	0.00719
2357	0.0073
2356.5	0.00727
2356	0.00655
2355.5	0.00584
2355	0.00575
2354.5	0.00416
2354	0.00357
2353.5	0.00275
2353	0.00271
2352.5	0.00366
2352	0.00317
2351.5	0.00422
2351	0.00519
2350.5	0.00553
2350	0.00546
2349.5	0.00547
2349	0.00528
2348.5	0.00503
2348	0.00482
2347.5	0.0044
2347	0.00416
2346.5	0.00479
2346	0.00528
2345.5	0.00512
2345	0.00585
2344.5	0.00557
2344	0.00482
2343.5	0.00493
2343	0.00483
2342.5	0.00458
2342	0.00371
2341.5	0.00356
2341	0.00401
2340.5	0.00381
2340	0.00391
2339.5	0.00475
2339	0.00488
2338.5	0.00525
2338	0.00558
2337.5	0.00593
2337	0.0057
2336.5	0.00596
2336	0.00611
2335.5	0.00653
2335	0.00696
2334.5	0.00595
2334	0.00627
2333.5	0.00654
2333	0.00627
2332.5	0.00637
2332	0.00509
2331.5	0.00502
2331	0.00544
2330.5	0.00526
2330	0.00477
2329.5	0.00447
2329	0.00458
2328.5	0.00473
2328	0.00474
2327.5	0.00473
2327	0.00484
2326.5	0.00546
2326	0.00551
2325.5	0.00441
2325	0.00445
2324.5	0.00428
2324	0.00314
2323.5	0.00236
2323	0.00125
2322.5	0.00138
2322	0.000943167
2321.5	0.00152
2321	0.00213
2320.5	0.00277
2320	0.00342
2319.5	0.00413
2319	0.00377
2318.5	0.00459
2318	0.00349
2317.5	0.00291
2317	0.00259
2316.5	0.00217
2316	0.00247
2315.5	0.00233
2315	0.00184
2314.5	0.00296
2314	0.00348
2313.5	0.0032
2313	0.00367
2312.5	0.0038
2312	0.00371
2311.5	0.00301
2311	0.00284
2310.5	0.00307
2310	0.00289
2309.5	0.00269
2309	0.00172
2308.5	0.000866694
2308	0.00164
2307.5	0.002
2307	0.00192
2306.5	0.00116
2306	0.00124
2305.5	0.00222
2305	0.00229
2304.5	0.00115
2304	0.000853949
2303.5	0.00126
2303	0.00111
2302.5	0.00106
2302	0.000458838
2301.5	0.000599039
2301	0.000968658
2300.5	0.00136
2300	-0.000769012
2299.5	-0.000574207
2299	-0.000290731
2298.5	-0.000637693
2298	-0.00042507
2297.5	-0.000721084
2297	-0.000832658
2296.5	-0.000588994
2296	-0.000326677
2295.5	7.60927e-05
2295	-8.1308e-05
2294.5	-0.000702501
2294	-0.000234872
2293.5	-3.14438e-05
2293	-1.89985e-05
2292.5	0.00019821
2292	6.58834e-06
2291.5	0.000281843
2291	0.000957994
2290.5	0.000270542
2290	-0.000117769
2289.5	-0.000773484
2289	-0.000613347
2288.5	-0.000457804
2288	-0.000338732
2287.5	-0.000689459
2287	-0.00077153
2286.5	-0.000509499
2286	-0.000868718
2285.5	-0.000682551
2285	-0.00126
2284.5	-0.000361582
2284	-0.00109
2283.5	-0.000679958
2283	-0.000812002
2282.5	-0.000587973
2282	0.000157082
2281.5	-0.000265194
2281	0.000248232
2280.5	-0.000155113
2280	0.000613745
2279.5	0.000181725
2279	-0.001
2278.5	2.94141e-05
2278	-0.000503665
2277.5	-0.000495953
2277	3.38991e-05
2276.5	-0.000263932
2276	-2.84885e-05
2275.5	-0.000278574
2275	-0.000428854
2274.5	-0.000638432
2274	-0.00115
2273.5	-0.00157
2273	-0.00177
2272.5	-0.00164
2272	-0.00131
2271.5	-0.00072565
2271	-0.000103508
2270.5	-0.000778432
2270	-0.000634443
2269.5	-0.000723057
2269	-0.00121
2268.5	-0.00175
2268	-0.00267
2267.5	-0.00218
2267	-0.00116
2266.5	-0.00112
2266	-0.00115
2265.5	-0.00087809
2265	-0.000529616
2264.5	-0.000605145
2264	-0.000899079
2263.5	-0.00101
2263	-0.000976222
2262.5	-0.000613132
2262	-0.000922656
2261.5	-0.000446118
2261	-0.000361984
2260.5	-8.1022e-05
2260	1.85626e-05
2259.5	0.000322632
2259	9.21734e-05
2258.5	0.000559107
2258	0.000432352
2257.5	0.000620329
2257	0.000635697
2256.5	0.00038589
2256	0.000324699
2255.5	1.11518e-06
2255	-0.00053099
2254.5	-0.000266036
2254	-0.000193873
2253.5	0.00017033
2253	0.000143521
2252.5	0.000109474
2252	0.000465047
2251.5	0.000661515
2251	0.00040614
2250.5	-0.000189301
2250	-7.87198e-05
2249.5	-0.000187657
2249	-0.000249266
2248.5	-0.000426272
2248	-0.000380557
2247.5	0.000177134
2247	0.000331146
2246.5	0.000798636
2246	0.000883327
2245.5	0.000894519
2245	0.000554789
2244.5	0.000896999
2244	0.00146
2243.5	0.000940264
2243	0.00138
2242.5	0.00134
2242	0.00166
2241.5	0.00126
2241	0.00106
2240.5	0.00149
2240	0.00168
2239.5	0.00156
2239	0.00124
2238.5	0.00131
2238	0.0016
2237.5	0.0014
2237	0.00119
2236.5	0.00106
2236	0.00127
2235.5	0.000866558
2235	0.00185
2234.5	0.00153
2234	0.00215
2233.5	0.00216
2233	0.00276
2232.5	0.0032
2232	0.00303
2231.5	0.00256
2231	0.00247
2230.5	0.00195
2230	0.00195
2229.5	0.0016
2229	0.00171
2228.5	0.00254
2228	0.00303
2227.5	0.00354
2227	0.00349
2226.5	0.00371
2226	0.00384
2225.5	0.00374
2225	0.00383
2224.5	0.00339
2224	0.00359
2223.5	0.00377
2223	0.00396
2222.5	0.00376
2222	0.0042
2221.5	0.00469
2221	0.00528
2220.5	0.00578
2220	0.00586
2219.5	0.00599
2219	0.00581
2218.5	0.0056
2218	0.00517
2217.5	0.0056
2217	0.00564
2216.5	0.00526
2216	0.00501
2215.5	0.00558
2215	0.0054
2214.5	0.00547
2214	0.00547
2213.5	0.00563
2213	0.00578
2212.5	0.00577
2212	0.00581
2211.5	0.00596
2211	0.0062
2210.5	0.00692
2210	0.00695
2209.5	0.00738
2209	0.00742
2208.5	0.00685
2208	0.00672
2207.5	0.00605
2207	0.00553
2206.5	0.00517
2206	0.00547
2205.5	0.00561
2205	0.00557
2204.5	0.00549
2204	0.0057
2203.5	0.0061
2203	0.00549
2202.5	0.00533
2202	0.00535
2201.5	0.00565
2201	0.00603
2200.5	0.00552
2200	0.00528
2199.5	0.005
2199	0.00505
2198.5	0.00443
2198	0.00358
2197.5	0.00328
2197	0.00356
2196.5	0.00348
2196	0.00397
2195.5	0.004
2195	0.00473
2194.5	0.00498
2194	0.00453
2193.5	0.0044
2193	0.0038
2192.5	0.00342
2192	0.00286
2191.5	0.00232
2191	0.00212
2190.5	0.00211
2190	0.00208
2189.5	0.00187
2189	0.00169
2188.5	0.002
2188	0.00215
2187.5	0.00203
2187	0.00209
2186.5	0.00197
2186	0.00211
2185.5	0.00193
2185	0.00154
2184.5	0.00166
2184	0.00168
2183.5	0.00163
2183	0.00189
2182.5	0.00214
2182	0.0017
2181.5	0.00159
2181	0.00131
2180.5	0.00136
2180	0.00105
2179.5	0.000645027
2179	0.000705079
2178.5	0.000849625
2178	0.00112
2177.5	0.00111
2177	0.000998182
2176.5	0.00139
2176	0.000154743
2175.5	0.000589521
2175	0.000991448
2174.5	0.000474238
2174	5.18222e-05
2173.5	-0.000272318
2173	-0.000158535
2172.5	-0.000380781
2172	-9.81482e-05
2171.5	-0.000323596
2171	-0.000423345
2170.5	3.22e-06
2170	0.000225022
2169.5	0.000583658
2169	-0.000154324
2168.5	-0.000246696
2168	-0.000646283
2167.5	-0.000553797
2167	-0.000755302
2166.5	-0.00104
2166	-0.000682109
2165.5	-0.00124
2165	-0.00167
2164.5	-0.00151
2164	-0.00221
2163.5	-0.0022
2163	-0.00259
2162.5	-0.00214
2162	-0.00198
2161.5	-0.00188
2161	-0.00154
2160.5	-0.00136
2160	-0.000796409
2159.5	-0.000604813
2159	-0.000267893
2158.5	0.000474796
2158	0.000304472
2157.5	0.000262212
2157	0.000610268
2156.5	0.000782794
2156	0.000624858
2155.5	3.69339e-05
2155	-9.91471e-05
2154.5	0.00032185
2154	0.000538781
2153.5	-3.06848e-06
2153	6.68665e-05
2152.5	-4.47569e-05
2152	-0.000163433
2151.5	8.51013e-05
2151	0.000155181
2150.5	0.000517441
2150	-4.44475e-05
2149.5	7.56048e-05
2149	3.59946e-05
2148.5	-0.000119291
2148	-0.000669347
2147.5	-0.000969679
2147	-0.000756084
2146.5	-0.00077913
2146	-0.000835305
2145.5	-0.000509375
2145	-0.000449179
2144.5	-0.000322028
2144	-7.37722e-05
2143.5	-2.74959e-05
2143	0.00019807
2142.5	-0.000311201
2142	-0.000526621
2141.5	-4.40916e-05
2141	0.000365357
2140.5	0.000679315
2140	0.000625924
2139.5	0.000787319
2139	0.00139
2138.5	0.000835884
2138	0.000729319
2137.5	0.000495107
2137	0.00087964
2136.5	0.00167
2136	0.00171
2135.5	0.00235
2135	0.00251
2134.5	0.00303
2134	0.00259
2133.5	0.00319
2133	0.00339
2132.5	0.00355
2132	0.004
2131.5	0.00432
2131	0.00503
2130.5	0.00515
2130	0.0049
2129.5	0.00433
2129	0.00532
2128.5	0.00521
2128	0.00502
2127.5	0.00551
2127	0.00617
2126.5	0.00712
2126	0.00691
2125.5	0.00716
2125	0.00759
2124.5	0.00751
2124	0.0072
2123.5	0.00765
2123	0.00793
2122.5	0.00819
2122	0.00833
2121.5	0.0089
2121	0.00982
2120.5	0.00979
2120	0.01007
2119.5	0.0107
2119	0.01171
2118.5	0.01128
2118	0.01114
2117.5	0.01174
2117	0.01218
2116.5	0.01234
2116	0.01258
2115.5	0.01308
2115	0.01343
2114.5	0.01356
2114	0.01418
2113.5	0.01468
2113	0.01531
2112.5	0.01564
2112	0.01566
2111.5	0.01686
2111	0.01723
2110.5	0.01739
2110	0.01775
2109.5	0.01807
2109	0.01855
2108.5	0.0191
2108	0.01927
2107.5	0.01941
2107	0.0193
2106.5	0.01946
2106	0.02004
2105.5	0.01993
2105	0.01939
2104.5	0.02046
2104	0.02063
2103.5	0.02123
2103	0.02089
2102.5	0.02155
2102	0.02211
2101.5	0.02177
2101	0.0219
2100.5	0.02218
2100	0.02258
2099.5	0.02292
2099	0.02309
2098.5	0.02402
2098	0.02494
2097.5	0.02506
2097	0.02526
2096.5	0.02527
2096	0.02583
2095.5	0.02627
2095	0.02661
2094.5	0.02654
2094	0.02691
2093.5	0.02749
2093	0.02843
2092.5	0.02839
2092	0.02821
2091.5	0.02877
2091	0.02935
2090.5	0.029
2090	0.02882
2089.5	0.02917
2089	0.02967
2088.5	0.02946
2088	0.02945
2087.5	0.03007
2087	0.03032
2086.5	0.03048
2086	0.03072
2085.5	0.03124
2085	0.03183
2084.5	0.03209
2084	0.03235
2083.5	0.03273
2083	0.0329
2082.5	0.0335
2082	0.03372
2081.5	0.03428
2081	0.03436
2080.5	0.03477
2080	0.03539
2079.5	0.03614
2079	0.03628
2078.5	0.03667
2078	0.03719
2077.5	0.03713
2077	0.03718
2076.5	0.03691
2076	0.03731
2075.5	0.03734
2075	0.03749
2074.5	0.03803
2074	0.0388
2073.5	0.03892
2073	0.03958
2072.5	0.03987
2072	0.04013
2071.5	0.04036
2071	0.04021
2070.5	0.0404
2070	0.04111
2069.5	0.04157
2069	0.04133
2068.5	0.04071
2068	0.04126
2067.5	0.04156
2067	0.04115
2066.5	0.0419
2066	0.04221
2065.5	0.04271
2065	0.04275
2064.5	0.0429
2064	0.04335
2063.5	0.04348
2063	0.04322
2062.5	0.0433
2062	0.04428
2061.5	0.04464
2061	0.04507
2060.5	0.04509
2060	0.0451
2059.5	0.04573
2059	0.04569
2058.5	0.04599
2058	0.04604
2057.5	0.04619
2057	0.047
2056.5	0.04763
2056	0.0477
2055.5	0.04782
2055	0.04756
2054.5	0.04834
2054	0.04869
2053.5	0.04894
2053	0.04942
2052.5	0.04894
2052	0.04944
2051.5	0.05009
2051	0.05021
2050.5	0.05022
2050	0.05078
2049.5	0.05128
2049	0.0516
2048.5	0.05149
2048	0.05164
2047.5	0.05187
2047	0.05203
2046.5	0.05219
2046	0.05241
2045.5	0.05316
2045	0.05332
2044.5	0.05422
2044	0.0545
2043.5	0.05502
2043	0.0548
2042.5	0.05576
2042	0.05598
2041.5	0.05587
2041	0.05609
2040.5	0.05612
2040	0.05651
2039.5	0.05747
2039	0.05765
2038.5	0.05838
2038	0.05885
2037.5	0.05943
2037	0.06014
2036.5	0.06017
2036	0.06027
2035.5	0.06064
2035	0.06054
2034.5	0.06101
2034	0.06155
2033.5	0.06178
2033	0.0627
2032.5	0.06356
2032	0.06367
2031.5	0.06433
2031	0.06429
2030.5	0.065
2030	0.06535
2029.5	0.06569
2029	0.06633
2028.5	0.06665
2028	0.06701
2027.5	0.06744
2027	0.06794
2026.5	0.06806
2026	0.06768
2025.5	0.06812
2025	0.06915
2024.5	0.06926
2024	0.06969
2023.5	0.07047
2023	0.0714
2022.5	0.07107
2022	0.07163
2021.5	0.07202
2021	0.07212
2020.5	0.07236
2020	0.07305
2019.5	0.07324
2019	0.0737
2018.5	0.07355
2018	0.07428
2017.5	0.07412
2017	0.07513
2016.5	0.07516
2016	0.07545
2015.5	0.07536
2015	0.07556
2014.5	0.07559
2014	0.07526
2013.5	0.07548
2013	0.07521
2012.5	0.07547
2012	0.07561
2011.5	0.07615
2011	0.0766
2010.5	0.07736
2010	0.07781
2009.5	0.07811
2009	0.07876
2008.5	0.07868
2008	0.07878
2007.5	0.07905
2007	0.07881
2006.5	0.07918
2006	0.07892
2005.5	0.07852
2005	0.07863
2004.5	0.07906
2004	0.07914
2003.5	0.07933
2003	0.07945
2002.5	0.08026
2002	0.08128
2001.5	0.08185
2001	0.08131
2000.5	0.08193
2000	0.08275
1999.5	0.08229
1999	0.0821
1998.5	0.08177
1998	0.08268
1997.5	0.08329
1997	0.08332
1996.5	0.08446
1996	0.08471
1995.5	0.08495
1995	0.08545
1994.5	0.08502
1994	0.08517
1993.5	0.08515
1993	0.08541
1992.5	0.08606
1992	0.08629
1991.5	0.08695
1991	0.0871
1990.5	0.08779
1990	0.08802
1989.5	0.08856
1989	0.08925
1988.5	0.09003
1988	0.09028
1987.5	0.09099
1987	0.0914
1986.5	0.09118
1986	0.09098
1985.5	0.09164
1985	0.09202
1984.5	0.09203
1984	0.09243
1983.5	0.09313
1983	0.09313
1982.5	0.09368
1982	0.09407
1981.5	0.09471
1981	0.09558
1980.5	0.09608
1980	0.09714
1979.5	0.09735
1979	0.09893
1978.5	0.09878
1978	0.09905
1977.5	0.09894
1977	0.09925
1976.5	0.09969
1976	0.10009
1975.5	0.1004
1975	0.10074
1974.5	0.10115
1974	0.10113
1973.5	0.10185
1973	0.10109
1972.5	0.10068
1972	0.10005
1971.5	0.10007
1971	0.10048
1970.5	0.10049
1970	0.10043
1969.5	0.10101
1969	0.10191
1968.5	0.10248
1968	0.1025
1967.5	0.10323
1967	0.10314
1966.5	0.10365
1966	0.10319
1965.5	0.10205
1965	0.10246
1964.5	0.10243
1964	0.10236
1963.5	0.10159
1963	0.10231
1962.5	0.10255
1962	0.10297
1961.5	0.10284
1961	0.10262
1960.5	0.10233
1960	0.10301
1959.5	0.10249
1959	0.10278
1958.5	0.10298
1958	0.10342
1957.5	0.10407
1957	0.10369
1956.5	0.10346
1956	0.10372
1955.5	0.103
1955	0.10311
1954.5	0.10283
1954	0.10312
1953.5	0.10345
1953	0.10304
1952.5	0.10241
1952	0.10224
1951.5	0.10171
1951	0.10164
1950.5	0.10105
1950	0.10132
1949.5	0.10175
1949	0.10143
1948.5	0.10152
1948	0.1013
1947.5	0.10118
1947	0.10086
1946.5	0.10085
1946	0.10018
1945.5	0.09936
1945	0.09985
1944.5	0.09942
1944	0.0991
1943.5	0.09837
1943	0.09818
1942.5	0.09768
1942	0.09749
1941.5	0.09669
1941	0.09643
1940.5	0.09685
1940	0.09679
1939.5	0.09708
1939	0.09659
1938.5	0.09628
1938	0.09662
1937.5	0.09582
1937	0.09498
1936.5	0.0937
1936	0.09368
1935.5	0.09356
1935	0.09313
1934.5	0.09294
1934	0.0932
1933.5	0.09296
1933	0.0926
1932.5	0.09215
1932	0.09184
1931.5	0.09126
1931	0.09095
1930.5	0.09048
1930	0.09031
1929.5	0.08921
1929	0.08868
1928.5	0.08851
1928	0.08792
1927.5	0.08752
1927	0.08753
1926.5	0.08748
1926	0.08739
1925.5	0.0881
1925	0.08821
1924.5	0.08802
1924	0.08726
1923.5	0.08666
1923	0.08523
1922.5	0.08477
1922	0.08403
1921.5	0.08365
1921	0.08355
1920.5	0.08395
1920	0.08408
1919.5	0.08488
1919	0.08389
1918.5	0.08404
1918	0.08434
1917.5	0.08437
1917	0.08408
1916.5	0.08242
1916	0.08299
1915.5	0.08296
1915	0.08237
1914.5	0.08105
1914	0.08093
1913.5	0.08137
1913	0.08086
1912.5	0.08018
1912	0.07993
1911.5	0.08084
1911	0.08073
1910.5	0.08028
1910	0.08071
1909.5	0.08017
1909	0.07998
1908.5	0.07901
1908	0.07856
1907.5	0.07863
1907	0.07788
1906.5	0.07738
1906	0.07764
1905.5	0.07781
1905	0.07677
1904.5	0.07604
1904	0.07566
1903.5	0.07549
1903	0.07568
1902.5	0.07449
1902	0.07429
1901.5	0.07445
1901	0.07436
1900.5	0.07365
1900	0.07342
1899.5	0.07334
1899	0.07305
1898.5	0.07274
1898	0.07265
1897.5	0.07284
1897	0.07222
1896.5	0.07147
1896	0.07072
1895.5	0.07034
1895	0.0699
1894.5	0.0694
1894	0.06913
1893.5	0.0693
1893	0.06934
1892.5	0.06909
1892	0.06868
1891.5	0.06818
1891	0.06775
1890.5	0.06708
1890	0.06682
1889.5	0.06638
1889	0.06609
1888.5	0.06587
1888	0.06533
1887.5	0.06556
1887	0.06528
1886.5	0.06527
1886	0.06495
1885.5	0.06447
1885	0.06399
1884.5	0.06351
1884	0.06334
1883.5	0.06301
1883	0.06235
1882.5	0.06191
1882	0.06163
1881.5	0.06162
1881	0.06093
1880.5	0.06064
1880	0.06041
1879.5	0.06018
1879	0.05967
1878.5	0.05901
1878	0.05862
1877.5	0.05819
1877	0.05732
1876.5	0.05676
1876	0.05649
1875.5	0.05596
1875	0.05569
1874.5	0.0553
1874	0.0552
1873.5	0.05479
1873	0.05452
1872.5	0.05386
1872	0.05355
1871.5	0.05317
1871	0.05297
1870.5	0.05258
1870	0.05204
1869.5	0.05142
1869	0.05148
1868.5	0.05081
1868	0.05028
1867.5	0.05021
1867	0.04985
1866.5	0.04947
1866	0.049
1865.5	0.04878
1865	0.04864
1864.5	0.04825
1864	0.04784
1863.5	0.04751
1863	0.04755
1862.5	0.0474
1862	0.04702
1861.5	0.04684
1861	0.04676
1860.5	0.04692
1860	0.04644
1859.5	0.04633
1859	0.04594
1858.5	0.04584
1858	0.0457
1857.5	0.04552
1857	0.04555
1856.5	0.04548
1856	0.04544
1855.5	0.04529
1855	0.04498
1854.5	0.04501
1854	0.04496
1853.5	0.04465
1853	0.04455
1852.5	0.0445
1852	0.04422
1851.5	0.04403
1851	0.04378
1850.5	0.04361
1850	0.04348
1849.5	0.04339
1849	0.04294
1848.5	0.04283
1848	0.04244
1847.5	0.04235
1847	0.04198
1846.5	0.04188
1846	0.04172
1845.5	0.04153
1845	0.04159
1844.5	0.0413
1844	0.04107
1843.5	0.04103
1843	0.04086
1842.5	0.04068
1842	0.04032
1841.5	0.0401
1841	0.03989
1840.5	0.03964
1840	0.03947
1839.5	0.03933
1839	0.03933
1838.5	0.0391
1838	0.03879
1837.5	0.03862
1837	0.03843
1836.5	0.03814
1836	0.03782
1835.5	0.03776
1835	0.03764
1834.5	0.03753
1834	0.03736
1833.5	0.03703
1833	0.03696
1832.5	0.0368
1832	0.03656
1831.5	0.03646
1831	0.03635
1830.5	0.03624
1830	0.036
1829.5	0.03573
1829	0.03552
1828.5	0.03524
1828	0.0351
1827.5	0.035
1827	0.03489
1826.5	0.03484
1826	0.03491
1825.5	0.03486
1825	0.03481
1824.5	0.03482
1824	0.03459
1823.5	0.03453
1823	0.0346
1822.5	0.03443
1822	0.03441
1821.5	0.03433
1821	0.03427
1820.5	0.0341
1820	0.03387
1819.5	0.03381
1819	0.03351
1818.5	0.03351
1818	0.03345
1817.5	0.03327
1817	0.03316
1816.5	0.03295
1816	0.03293
1815.5	0.03278
1815	0.03238
1814.5	0.03235
1814	0.03214
1813.5	0.03185
1813	0.03159
1812.5	0.03136
1812	0.03111
1811.5	0.03087
1811	0.03057
1810.5	0.0303
1810	0.03015
1809.5	0.03001
1809	0.02983
1808.5	0.02962
1808	0.02935
1807.5	0.02902
1807	0.02872
1806.5	0.02842
1806	0.02808
1805.5	0.02787
1805	0.02759
1804.5	0.02726
1804	0.02709
1803.5	0.02688
1803	0.02675
1802.5	0.02644
1802	0.02609
1801.5	0.0258
1801	0.02545
1800.5	0.02515
1800	0.02474
1799.5	0.02435
1799	0.02414
1798.5	0.02402
1798	0.02367
1797.5	0.02345
1797	0.02319
1796.5	0.02297
1796	0.02253
1795.5	0.02198
1795	0.02153
1794.5	0.0211
1794	0.02061
1793.5	0.0201
1793	0.01977
1792.5	0.01956
1792	0.01924
1791.5	0.01896
1791	0.01877
1790.5	0.0184
1790	0.01813
1789.5	0.01783
1789	0.01743
1788.5	0.01711
1788	0.0168
1787.5	0.01645
1787	0.01618
1786.5	0.0158
1786	0.01536
1785.5	0.01505
1785	0.01459
1784.5	0.01432
1784	0.01394
1783.5	0.01356
1783	0.01331
1782.5	0.01299
1782	0.01266
1781.5	0.01251
1781	0.01232
1780.5	0.01213
1780	0.0119
1779.5	0.01157
1779	0.0114
1778.5	0.01104
1778	0.01076
1777.5	0.01054
1777	0.01034
1776.5	0.01022
1776	0.00996
1775.5	0.00988
1775	0.00963
1774.5	0.00948
1774	0.0093
1773.5	0.00918
1773	0.00913
1772.5	0.00904
1772	0.00881
1771.5	0.00864
1771	0.00856
1770.5	0.00834
1770	0.00817
1769.5	0.00814
1769	0.00801
1768.5	0.00797
1768	0.00793
1767.5	0.00799
1767	0.00794
1766.5	0.00796
1766	0.00791
1765.5	0.00785
1765	0.00774
1764.5	0.00771
1764	0.00766
1763.5	0.00753
1763	0.00751
1762.5	0.00745
1762	0.00746
1761.5	0.00737
1761	0.00739
1760.5	0.0074
1760	0.00737
1759.5	0.00741
1759	0.00741
1758.5	0.00734
1758	0.00731
1757.5	0.00727
1757	0.00731
1756.5	0.00725
1756	0.00728
1755.5	0.00731
1755	0.00733
1754.5	0.00726
1754	0.00722
1753.5	0.00703
1753	0.00696
1752.5	0.0068
1752	0.00667
1751.5	0.00665
1751	0.00654
1750.5	0.00647
1750	0.0064
1749.5	0.00623
1749	0.0062
1748.5	0.00606
1748	0.00596
1747.5	0.00585
1747	0.00571
1746.5	0.00556
1746	0.00542
1745.5	0.00524
1745	0.00512
1744.5	0.00487
1744	0.00462
1743.5	0.00439
1743	0.00421
1742.5	0.00397
1742	0.00369
1741.5	0.00341
1741	0.00332
1740.5	0.00312
1740	0.00301
1739.5	0.00291
1739	0.00278
1738.5	0.00255
1738	0.0023
1737.5	0.00212
1737	0.00178
1736.5	0.00157
1736	0.00139
1735.5	0.00118
1735	0.00107
1734.5	0.000998771
1734	0.000895547
1733.5	0.000802902
1733	0.000738375
1732.5	0.00061427
1732	0.00051731
1731.5	0.000347547
1731	0.000192958
1730.5	3.8508e-05
1730	-2.30957e-05
1729.5	-0.000109895
1729	-0.00021298
1728.5	-0.000241454
1728	-0.000286771
1727.5	-0.000387212
1727	-0.000312956
1726.5	-0.000390429
1726	-0.000343735
1725.5	-0.000259457
1725	-0.000229467
1724.5	-0.000188063
1724	-0.000233102
1723.5	-0.000186408
1723	-0.000164353
1722.5	-0.000139096
1722	-9.33761e-05
1721.5	-0.000123103
1721	-8.06193e-06
1720.5	-6.68817e-05
1720	-3.68929e-05
1719.5	-0.000195228
1719	-0.000400753
1718.5	-0.000437288
1718	-0.000605507
1717.5	-0.000651787
1717	-0.000615938
1716.5	-0.000815059
1716	-0.000959057
1715.5	-0.000995036
1715	-0.00108
1714.5	-0.00115
1714	-0.00135
1713.5	-0.00144
1713	-0.00151
1712.5	-0.00157
1712	-0.0017
1711.5	-0.00168
1711	-0.00165
1710.5	-0.00168
1710	-0.00158
1709.5	-0.00159
1709	-0.00149
1708.5	-0.00146
1708	-0.00145
1707.5	-0.00145
1707	-0.0014
1706.5	-0.00134
1706	-0.00134
1705.5	-0.00125
1705	-0.00119
1704.5	-0.00103
1704	-0.000902992
1703.5	-0.000804086
1703	-0.00067386
1702.5	-0.000584837
1702	-0.000388352
1701.5	-0.000275386
1701	-0.000158384
1700.5	-6.44294e-06
1700	0.00043697
1699.5	0.000322583
1699	0.000476527
1698.5	0.000159396
1698	0.000806463
1697.5	0.00129
1697	0.000651178
1696.5	3.07042e-05
1696	-0.000579063
1695.5	0.00182
1695	0.00272
1694.5	0.00316
1694	0.00346
1693.5	0.00344
1693	0.00274
1692.5	0.00386
1692	0.00342
1691.5	0.00491
1691	0.00387
1690.5	0.00498
1690	0.00582
1689.5	0.00684
1689	0.00522
1688.5	0.00759
1688	0.00949
1687.5	0.01025
1687	0.01371
1686.5	0.01457
1686	0.01617
1685.5	0.01703
1685	0.01829
1684.5	0.01831
1684	0.01869
1683.5	0.01951
1683	0.02061
1682.5	0.02195
1682	0.01922
1681.5	0.01939
1681	0.01977
1680.5	0.01826
1680	0.01931
1679.5	0.01924
1679	0.01882
1678.5	0.02058
1678	0.02225
1677.5	0.02326
1677	0.0248
1676.5	0.02497
1676	0.02579
1675.5	0.02808
1675	0.03032
1674.5	0.03169
1674	0.03115
1673.5	0.03262
1673	0.03476
1672.5	0.03507
1672	0.03552
1671.5	0.03658
1671	0.03817
1670.5	0.03903
1670	0.04057
1669.5	0.04189
1669	0.04236
1668.5	0.04282
1668	0.04276
1667.5	0.04388
1667	0.04411
1666.5	0.04569
1666	0.04739
1665.5	0.04841
1665	0.04947
1664.5	0.04893
1664	0.05124
1663.5	0.05168
1663	0.05243
1662.5	0.05347
1662	0.05493
1661.5	0.05584
1661	0.05871
1660.5	0.06067
1660	0.06176
1659.5	0.0613
1659	0.06287
1658.5	0.06443
1658	0.06643
1657.5	0.06738
1657	0.06866
1656.5	0.07069
1656	0.07342
1655.5	0.07451
1655	0.07644
1654.5	0.0783
1654	0.07897
1653.5	0.08027
1653	0.0819
1652.5	0.08545
1652	0.08772
1651.5	0.09043
1651	0.09318
1650.5	0.09535
1650	0.09657
1649.5	0.09934
1649	0.1021
1648.5	0.1037
1648	0.10496
1647.5	0.10791
1647	0.11201
1646.5	0.11589
1646	0.11488
1645.5	0.11741
1645	0.11792
1644.5	0.11953
1644	0.11997
1643.5	0.12035
1643	0.12059
1642.5	0.12102
1642	0.12551
1641.5	0.12697
1641	0.1261
1640.5	0.12562
1640	0.12635
1639.5	0.12684
1639	0.12758
1638.5	0.12847
1638	0.13057
1637.5	0.13277
1637	0.13565
1636.5	0.13681
1636	0.13761
1635.5	0.13678
1635	0.13857
1634.5	0.14064
1634	0.14406
1633.5	0.14619
1633	0.14733
1632.5	0.14856
1632	0.15016
1631.5	0.15228
1631	0.15357
1630.5	0.15417
1630	0.15533
1629.5	0.15642
1629	0.15759
1628.5	0.15803
1628	0.1584
1627.5	0.16045
1627	0.16011
1626.5	0.15946
1626	0.163
1625.5	0.16137
1625	0.16294
1624.5	0.16401
1624	0.16657
1623.5	0.16807
1623	0.16947
1622.5	0.17134
1622	0.17239
1621.5	0.17431
1621	0.17386
1620.5	0.17778
1620	0.17882
1619.5	0.17933
1619	0.18162
1618.5	0.18172
1618	0.18419
1617.5	0.18421
1617	0.18592
1616.5	0.18899
1616	0.18803
1615.5	0.19219
1615	0.19324
1614.5	0.1947
1614	0.19694
1613.5	0.19843
1613	0.20054
1612.5	0.20182
1612	0.20509
1611.5	0.20649
1611	0.20912
1610.5	0.21168
1610	0.21342
1609.5	0.21682
1609	0.21686
1608.5	0.22085
1608	0.22279
1607.5	0.22366
1607	0.22578
1606.5	0.22592
1606	0.22645
1605.5	0.22676
1605	0.22717
1604.5	0.22756
1604	0.22851
1603.5	0.2286
1603	0.2297
1602.5	0.23024
1602	0.22827
1601.5	0.2296
1601	0.22975
1600.5	0.23062
1600	0.2332
1599.5	0.23416
1599	0.234
1598.5	0.23407
1598	0.23694
1597.5	0.23678
1597	0.23665
1596.5	0.23743
1596	0.23876
1595.5	0.23963
1595	0.24051
1594.5	0.24147
1594	0.2425
1593.5	0.24353
1593	0.24592
1592.5	0.24514
1592	0.24836
1591.5	0.24755
1591	0.24714
1590.5	0.24745
1590	0.24887
1589.5	0.24788
1589	0.24729
1588.5	0.24626
1588	0.24568
1587.5	0.24682
1587	0.24481
1586.5	0.24398
1586	0.24558
1585.5	0.24329
1585	0.24538
1584.5	0.24766
1584	0.25118
1583.5	0.25232
1583	0.25511
1582.5	0.25804
1582	0.26009
1581.5	0.26389
1581	0.268
1580.5	0.27096
1580	0.27613
1579.5	0.27809
1579	0.28267
1578.5	0.28494
1578	0.29011
1577.5	0.29152
1577	0.295
1576.5	0.29819
1576	0.30362
1575.5	0.30649
1575	0.31233
1574.5	0.31481
1574	0.31807
1573.5	0.32333
1573	0.32802
1572.5	0.33184
1572	0.33593
1571.5	0.33755
1571	0.34356
1570.5	0.34753
1570	0.34893
1569.5	0.35168
1569	0.3547
1568.5	0.35539
1568	0.35711
1567.5	0.35782
1567	0.35758
1566.5	0.35642
1566	0.3559
1565.5	0.35216
1565	0.35196
1564.5	0.34765
1564	0.34594
1563.5	0.34185
1563	0.33818
1562.5	0.33369
1562	0.33037
1561.5	0.32871
1561	0.32505
1560.5	0.32368
1560	0.32062
1559.5	0.31813
1559	0.316
1558.5	0.31227
1558	0.31367
1557.5	0.31189
1557	0.31091
1556.5	0.30961
1556	0.30762
1555.5	0.30595
1555	0.30526
1554.5	0.30542
1554	0.30545
1553.5	0.30348
1553	0.30579
1552.5	0.30544
1552	0.30338
1551.5	0.30355
1551	0.30084
1550.5	0.3018
1550	0.30343
1549.5	0.30359
1549	0.30458
1548.5	0.30703
1548	0.30532
1547.5	0.30643
1547	0.3073
1546.5	0.30596
1546	0.30651
1545.5	0.30971
1545	0.3104
1544.5	0.31171
1544	0.31044
1543.5	0.3115
1543	0.31245
1542.5	0.31073
1542	0.30936
1541.5	0.31176
1541	0.31286
1540.5	0.31395
1540	0.31556
1539.5	0.31744
1539	0.31756
1538.5	0.31896
1538	0.31718
1537.5	0.31863
1537	0.31819
1536.5	0.31764
1536	0.31651
1535.5	0.31832
1535	0.31756
1534.5	0.31626
1534	0.31491
1533.5	0.31385
1533	0.31149
1532.5	0.30969
1532	0.30904
1531.5	0.31015
1531	0.31046
1530.5	0.30849
1530	0.30813
1529.5	0.30789
1529	0.30373
1528.5	0.30021
1528	0.30117
1527.5	0.29923
1527	0.2985
1526.5	0.29809
1526	0.29727
1525.5	0.29621
1525	0.29319
1524.5	0.29056
1524	0.29156
1523.5	0.29155
1523	0.29312
1522.5	0.29336
1522	0.29226
1521.5	0.2896
1521	0.28848
1520.5	0.28751
1520	0.28637
1519.5	0.28662
1519	0.28722
1518.5	0.28778
1518	0.28816
1517.5	0.28578
1517	0.28393
1516.5	0.28348
1516	0.28506
1515.5	0.28695
1515	0.29047
1514.5	0.29098
1514	0.29213
1513.5	0.29246
1513	0.29229
1512.5	0.29022
1512	0.28973
1511.5	0.29091
1511	0.29249
1510.5	0.29522
1510	0.29536
1509.5	0.29464
1509	0.29366
1508.5	0.29228
1508	0.29527
1507.5	0.29401
1507	0.29603
1506.5	0.29761
1506	0.29759
1505.5	0.29661
1505	0.29402
1504.5	0.29203
1504	0.29004
1503.5	0.2892
1503	0.28644
1502.5	0.28483
1502	0.28032
1501.5	0.27717
1501	0.27573
1500.5	0.27263
[truncated: 2,601 more rows]

## Sheet: EuF3
2500	0.07964		EuF3
2499.5	0.02765
2499	0.04968
2498.5	0.01751
2498	0.00695
2497.5	-0.02962
2497	0.01336
2496.5	0.02302
2496	0.05275
2495.5	0.02776
2495	0.00948
2494.5	0.01096
2494	-0.00511
2493.5	0.04036
2493	0.03359
2492.5	0.07951
2492	0.08203
2491.5	0.06389
2491	0.09658
2490.5	0.03277
2490	0.05098
2489.5	0.02771
2489	0.09575
2488.5	0.10786
2488	0.14721
2487.5	0.14369
2487	0.08392
2486.5	0.11306
2486	0.1176
2485.5	0.11323
2485	0.02742
2484.5	0.01282
2484	0.0028
2483.5	0.01729
2483	0.03479
2482.5	0.01369
2482	0.0218
2481.5	0.01263
2481	0.02998
2480.5	0.01257
2480	-0.0024
2479.5	0.00596
2479	-0.01371
2478.5	0.05739
2478	0.02071
2477.5	0.08123
2477	0.03697
2476.5	0.04371
2476	0.05489
2475.5	0.06718
2475	0.0824
2474.5	0.01934
2474	-0.00331
2473.5	-0.03596
2473	0.00396
2472.5	-0.01435
2472	0.00182
2471.5	0.01381
2471	0.04305
2470.5	0.04028
2470	0.07866
2469.5	0.06083
2469	0.05606
2468.5	0.02878
2468	0.02156
2467.5	0.04707
2467	0.04082
2466.5	0.02606
2466	0.01323
2465.5	0.03997
2465	0.10322
2464.5	0.11344
2464	0.09067
2463.5	0.07494
2463	0.03511
2462.5	0.05138
2462	0.04216
2461.5	0.07537
2461	0.05888
2460.5	0.04599
2460	0.03209
2459.5	0.04452
2459	0.0484
2458.5	0.01247
2458	0.03435
2457.5	0.068
2457	0.10286
2456.5	0.08258
2456	0.0359
2455.5	0.00385
2455	-0.00705
2454.5	-0.0215
2454	-0.02221
2453.5	-0.03066
2453	0.000919748
2452.5	0.00798
2452	0.03174
2451.5	0.00116
2451	0.0315
2450.5	0.04278
2450	0.07906
2449.5	0.02943
2449	0.01006
2448.5	-0.000165652
2448	0.01759
2447.5	0.01
2447	-0.01245
2446.5	-0.01481
2446	-0.02114
2445.5	-0.0195
2445	-0.03059
2444.5	-0.01772
2444	-0.01078
2443.5	-0.01675
2443	0.01567
2442.5	0.03116
2442	0.06525
2441.5	0.03342
2441	0.04448
2440.5	0.01837
2440	0.02278
2439.5	0.00289
2439	0.0023
2438.5	-0.00484
2438	0.01485
2437.5	0.03747
2437	0.021
2436.5	0.02588
2436	0.03125
2435.5	0.04344
2435	0.04491
2434.5	0.04138
2434	0.04296
2433.5	0.02702
2433	-0.02607
2432.5	-0.02901
2432	0.00164
2431.5	0.03621
2431	0.04086
2430.5	0.03355
2430	0.01204
2429.5	0.01936
2429	-0.02396
2428.5	-0.02041
2428	-0.02754
2427.5	-0.03326
2427	-0.03586
2426.5	-0.01695
2426	0.0226
2425.5	0.04004
2425	0.04543
2424.5	0.022
2424	0.00404
2423.5	0.02104
2423	0.03341
2422.5	0.01844
2422	0.0063
2421.5	-0.00454
2421	-0.01006
2420.5	0.00707
2420	0.013
2419.5	0.03329
2419	0.04309
2418.5	0.06146
2418	0.06369
2417.5	0.05425
2417	0.04853
2416.5	0.03642
2416	0.02193
2415.5	0.000867085
2415	0.00391
2414.5	0.00329
2414	0.01445
2413.5	-0.00779
2413	-0.00411
2412.5	0.00487
2412	0.01635
2411.5	0.03537
2411	0.0339
2410.5	0.0288
2410	0.04072
2409.5	0.03291
2409	0.01247
2408.5	0.01276
2408	-0.01336
2407.5	-0.01288
2407	-0.01177
2406.5	0.01129
2406	-0.01041
2405.5	-0.02929
2405	-0.04513
2404.5	-0.03573
2404	-0.01711
2403.5	0.01554
2403	0.05196
2402.5	0.08469
2402	0.05754
2401.5	0.05137
2401	0.00967
2400.5	0.00996
2400	-0.00482
2399.5	0.00877
2399	0.01943
2398.5	0.03423
2398	0.02148
2397.5	0.00534
2397	0.00295
2396.5	-0.0065
2396	-0.01127
2395.5	-0.0078
2395	-0.01637
2394.5	-0.0094
2394	-0.02864
2393.5	-0.01484
2393	-0.00183
2392.5	0.01758
2392	0.03401
2391.5	0.01694
2391	0.01034
2390.5	0.01369
2390	0.03154
2389.5	0.0243
2389	0.0056
2388.5	-0.00381
2388	0.00254
2387.5	-0.0018
2387	0.01089
2386.5	0.0062
2386	0.02423
2385.5	0.02338
2385	-0.00645
2384.5	0.00653
2384	-0.000402712
2383.5	0.01837
2383	-0.000196356
2382.5	0.00523
2382	0.0038
2381.5	0.01055
2381	0.02763
2380.5	0.04403
2380	0.05033
2379.5	0.03582
2379	0.03685
2378.5	0.01654
2378	0.02092
2377.5	0.00822
2377	-0.00221
2376.5	-0.000266044
2376	-0.01558
2375.5	0.00642
2375	0.02094
2374.5	0.02711
2374	-0.000869155
2373.5	0.00277
2373	-0.00145
2372.5	-0.00207
2372	-0.01495
2371.5	-0.02321
2371	-0.00758
2370.5	0.01189
2370	0.03742
2369.5	0.03249
2369	0.03298
2368.5	0.02221
2368	0.02455
2367.5	0.02002
2367	0.00989
2366.5	0.00803
2366	0.02319
2365.5	0.04289
2365	0.03937
2364.5	0.01612
2364	0.01025
2363.5	-0.00116
2363	0.01001
2362.5	0.01799
2362	0.01986
2361.5	0.00904
2361	0.00807
2360.5	0.01024
2360	0.01398
2359.5	0.02012
2359	0.03081
2358.5	0.0147
2358	0.01283
2357.5	-0.00851
2357	-0.00401
2356.5	-0.00858
2356	-0.01614
2355.5	-0.02159
2355	-0.01663
2354.5	-0.00127
2354	0.03749
2353.5	0.03034
2353	0.01405
2352.5	-0.00766
2352	-0.00014633
2351.5	0.01189
2351	0.00798
2350.5	0.0196
2350	0.00836
2349.5	0.00218
2349	-0.00947
2348.5	0.005
2348	-0.01025
2347.5	-0.0158
2347	-0.02651
2346.5	-0.01687
2346	-0.00666
2345.5	-0.000294018
2345	0.01112
2344.5	-0.00595
2344	0.000842515
2343.5	0.01286
2343	0.03284
2342.5	0.0392
2342	0.02128
2341.5	0.01971
2341	0.0171
2340.5	0.01223
2340	0.01161
2339.5	0.00704
2339	0.0063
2338.5	0.01863
2338	0.02237
2337.5	0.02684
2337	0.01457
2336.5	-0.00134
2336	0.01053
2335.5	0.02086
2335	0.03462
2334.5	0.01691
2334	0.00389
2333.5	-0.00401
2333	0.00268
2332.5	0.00254
2332	0.01317
2331.5	0.01207
2331	0.01371
2330.5	0.00811
2330	0.00545
2329.5	0.01798
2329	0.01906
2328.5	0.02681
2328	0.01381
2327.5	0.02126
2327	0.01526
2326.5	0.000599344
2326	-0.00936
2325.5	-0.01421
2325	0.00391
2324.5	0.0173
2324	0.01701
2323.5	0.00572
2323	-0.00564
2322.5	0.007
2322	0.00705
2321.5	-0.00696
2321	-0.00624
2320.5	-0.01212
2320	-0.00907
2319.5	-0.00202
2319	0.01722
2318.5	0.02666
2318	0.03793
2317.5	0.03557
2317	0.02978
2316.5	0.01688
2316	-0.000719399
2315.5	0.00128
2315	0.00334
2314.5	0.013
2314	0.00525
2313.5	0.00231
2313	-0.00991
2312.5	-0.00393
2312	0.000683413
2311.5	0.00898
2311	0.03368
2310.5	0.0533
2310	0.04839
2309.5	0.0151
2309	0.00878
2308.5	0.02308
2308	0.03989
2307.5	0.02049
2307	0.0222
2306.5	0.02547
2306	0.05434
2305.5	0.06306
2305	0.05915
2304.5	0.07874
2304	0.06027
2303.5	0.07014
2303	0.06069
2302.5	0.0521
2302	0.02532
2301.5	0.03255
2301	0.05548
2300.5	0.05028
2300	0.04312
2299.5	0.06055
2299	0.07359
2298.5	0.1157
2298	0.1072
2297.5	0.09238
2297	0.05987
2296.5	0.05362
2296	0.01496
2295.5	0.0454
2295	0.05367
2294.5	0.10265
2294	0.09818
2293.5	0.08495
2293	0.10176
2292.5	0.11284
2292	0.09656
2291.5	0.10784
2291	0.11411
2290.5	0.13244
2290	0.11858
2289.5	0.10964
2289	0.09069
2288.5	0.08147
2288	0.08249
2287.5	0.07076
2287	0.08688
2286.5	0.08027
2286	0.08226
2285.5	0.10396
2285	0.1269
2284.5	0.13729
2284	0.12551
2283.5	0.12823
2283	0.11109
2282.5	0.12481
2282	0.14087
2281.5	0.16476
2281	0.14242
2280.5	0.13079
2280	0.12244
2279.5	0.1086
2279	0.09321
2278.5	0.07864
2278	0.10939
2277.5	0.14172
2277	0.1618
2276.5	0.14961
2276	0.15028
2275.5	0.16745
2275	0.15182
2274.5	0.1547
2274	0.14347
2273.5	0.14514
2273	0.16475
2272.5	0.14677
2272	0.13218
2271.5	0.11643
2271	0.10878
2270.5	0.12503
2270	0.12919
2269.5	0.15238
2269	0.16595
2268.5	0.19286
2268	0.17509
2267.5	0.1911
2267	0.16361
2266.5	0.14528
2266	0.12314
2265.5	0.12146
2265	0.13423
2264.5	0.153
2264	0.15419
2263.5	0.1544
2263	0.14263
2262.5	0.13221
2262	0.12638
2261.5	0.13834
2261	0.15676
2260.5	0.14743
2260	0.13032
2259.5	0.12975
2259	0.14447
2258.5	0.16753
2258	0.17167
2257.5	0.18241
2257	0.16039
2256.5	0.14386
2256	0.15278
2255.5	0.15801
2255	0.17018
2254.5	0.15777
2254	0.15718
2253.5	0.16302
2253	0.18259
2252.5	0.17485
2252	0.17523
2251.5	0.15782
2251	0.17218
2250.5	0.17438
2250	0.18734
2249.5	0.18353
2249	0.1906
2248.5	0.17179
2248	0.1651
2247.5	0.16845
2247	0.15479
2246.5	0.1817
2246	0.15132
2245.5	0.16129
2245	0.15228
2244.5	0.16529
2244	0.15657
2243.5	0.15639
2243	0.15584
2242.5	0.1801
2242	0.19777
2241.5	0.20895
2241	0.17335
2240.5	0.18687
2240	0.18278
2239.5	0.17218
2239	0.17448
2238.5	0.17177
2238	0.1861
2237.5	0.1887
2237	0.16475
2236.5	0.15359
2236	0.15184
2235.5	0.16697
2235	0.18203
2234.5	0.1956
2234	0.17448
2233.5	0.17896
2233	0.1852
2232.5	0.22091
2232	0.19499
2231.5	0.19037
2231	0.19577
2230.5	0.22581
2230	0.22178
2229.5	0.2228
2229	0.20957
2228.5	0.22979
2228	0.19105
2227.5	0.20448
2227	0.20308
2226.5	0.22169
2226	0.22452
2225.5	0.21735
2225	0.2081
2224.5	0.22357
2224	0.22681
2223.5	0.24196
2223	0.22421
2222.5	0.22897
2222	0.23484
2221.5	0.22573
2221	0.25516
2220.5	0.24313
2220	0.22458
2219.5	0.23043
2219	0.22999
2218.5	0.22509
2218	0.22874
2217.5	0.22701
2217	0.22927
2216.5	0.2479
2216	0.22612
2215.5	0.25144
2215	0.2301
2214.5	0.27577
2214	0.2829
2213.5	0.29279
2213	0.28971
2212.5	0.247
2212	0.25548
2211.5	0.23508
2211	0.27241
2210.5	0.27246
2210	0.24557
2209.5	0.2383
2209	0.2231
2208.5	0.25668
2208	0.26042
2207.5	0.2579
2207	0.26247
2206.5	0.27345
2206	0.2831
2205.5	0.29961
2205	0.30051
2204.5	0.31532
2204	0.29615
2203.5	0.30643
2203	0.3122
2202.5	0.31164
2202	0.34795
2201.5	0.37748
2201	0.36042
2200.5	0.34147
2200	0.34103
2199.5	0.36252
2199	0.36661
2198.5	0.36751
2198	0.37617
2197.5	0.3922
2197	0.3733
2196.5	0.35655
2196	0.35451
2195.5	0.35801
2195	0.38073
2194.5	0.41356
2194	0.43288
2193.5	0.43933
2193	0.44155
2192.5	0.44535
2192	0.43634
2191.5	0.4368
2191	0.47213
2190.5	0.4847
2190	0.50193
2189.5	0.49634
2189	0.48165
2188.5	0.46659
2188	0.47178
2187.5	0.47325
2187	0.48102
2186.5	0.48445
2186	0.50522
2185.5	0.52058
2185	0.53897
2184.5	0.51099
2184	0.49123
2183.5	0.46282
2183	0.47643
2182.5	0.48065
2182	0.47298
2181.5	0.48434
2181	0.48347
2180.5	0.49537
2180	0.48832
2179.5	0.47199
2179	0.46689
2178.5	0.47425
2178	0.44174
2177.5	0.45356
2177	0.4294
2176.5	0.43371
2176	0.42635
2175.5	0.46237
2175	0.46341
2174.5	0.47243
2174	0.44778
2173.5	0.44222
2173	0.41696
2172.5	0.41625
2172	0.41557
2171.5	0.45563
2171	0.4572
2170.5	0.45483
2170	0.44826
2169.5	0.46389
2169	0.46129
2168.5	0.44863
2168	0.46299
2167.5	0.47873
2167	0.50029
2166.5	0.49536
2166	0.52004
2165.5	0.5355
2165	0.52449
2164.5	0.53041
2164	0.50335
2163.5	0.51877
2163	0.52946
2162.5	0.57617
2162	0.57781
2161.5	0.6002
2161	0.62379
2160.5	0.69122
2160	0.6504
2159.5	0.64388
2159	0.64164
2158.5	0.64133
2158	0.66601
2157.5	0.64831
2157	0.65445
2156.5	0.65167
2156	0.63366
2155.5	0.62004
2155	0.61192
2154.5	0.59551
2154	0.6088
2153.5	0.58656
2153	0.6162
2152.5	0.57014
2152	0.58948
2151.5	0.57948
2151	0.57297
2150.5	0.55622
2150	0.56229
2149.5	0.57832
2149	0.57198
2148.5	0.52298
2148	0.50329
2147.5	0.49706
2147	0.48585
2146.5	0.49475
2146	0.48803
2145.5	0.50716
2145	0.49118
2144.5	0.45971
2144	0.43202
2143.5	0.44508
2143	0.44559
2142.5	0.45939
2142	0.45639
2141.5	0.4434
2141	0.44043
2140.5	0.44367
2140	0.423
2139.5	0.43914
2139	0.45819
2138.5	0.45434
2138	0.43817
2137.5	0.41351
2137	0.39565
2136.5	0.37795
2136	0.41861
2135.5	0.43533
2135	0.42298
2134.5	0.38843
2134	0.37479
2133.5	0.3498
2133	0.35752
2132.5	0.35568
2132	0.3672
2131.5	0.36245
2131	0.37237
2130.5	0.371
2130	0.35421
2129.5	0.34687
2129	0.35307
2128.5	0.36544
2128	0.36054
2127.5	0.35618
2127	0.3606
2126.5	0.35406
2126	0.35242
2125.5	0.34658
2125	0.36277
2124.5	0.35638
2124	0.32824
2123.5	0.31005
2123	0.31955
2122.5	0.34542
2122	0.3582
2121.5	0.35748
2121	0.35807
2120.5	0.35828
2120	0.3561
2119.5	0.35693
2119	0.34
2118.5	0.34244
2118	0.36284
2117.5	0.36151
2117	0.36175
2116.5	0.34977
2116	0.3463
2115.5	0.36175
2115	0.36431
2114.5	0.35929
2114	0.37362
2113.5	0.37047
2113	0.37833
2112.5	0.35552
2112	0.35154
2111.5	0.35652
2111	0.34919
2110.5	0.3569
2110	0.36164
2109.5	0.38654
2109	0.39345
2108.5	0.41852
2108	0.41973
2107.5	0.42362
2107	0.40706
2106.5	0.39326
2106	0.39972
2105.5	0.4087
2105	0.43128
2104.5	0.42112
2104	0.41977
2103.5	0.4143
2103	0.40759
2102.5	0.37886
2102	0.39395
2101.5	0.41449
2101	0.46302
2100.5	0.47829
2100	0.4584
2099.5	0.4732
2099	0.45317
2098.5	0.43344
2098	0.43311
2097.5	0.4231
2097	0.44338
2096.5	0.44624
2096	0.45004
2095.5	0.4417
2095	0.42261
2094.5	0.42083
2094	0.41526
2093.5	0.44842
2093	0.4793
2092.5	0.47207
2092	0.47349
2091.5	0.47287
2091	0.48466
2090.5	0.48703
2090	0.46445
2089.5	0.45333
2089	0.45131
2088.5	0.44804
2088	0.43929
2087.5	0.4429
2087	0.45987
2086.5	0.4614
2086	0.48079
2085.5	0.47718
2085	0.46961
2084.5	0.49415
2084	0.51528
2083.5	0.50019
2083	0.47292
2082.5	0.48936
2082	0.49591
2081.5	0.52117
2081	0.48891
2080.5	0.47184
2080	0.47347
2079.5	0.47761
2079	0.49685
2078.5	0.50296
2078	0.51143
2077.5	0.50853
2077	0.50088
2076.5	0.50419
2076	0.5207
2075.5	0.53633
2075	0.53918
2074.5	0.55075
2074	0.57788
2073.5	0.59636
2073	0.62192
2072.5	0.60139
2072	0.63113
2071.5	0.62282
2071	0.63854
2070.5	0.63114
2070	0.68361
2069.5	0.66405
2069	0.69577
2068.5	0.65914
2068	0.70452
2067.5	0.67399
2067	0.68477
2066.5	0.67805
2066	0.67177
2065.5	0.69295
2065	0.70123
2064.5	0.71441
2064	0.70752
2063.5	0.69026
2063	0.69369
2062.5	0.67638
2062	0.70106
2061.5	0.67229
2061	0.67054
2060.5	0.64149
2060	0.65181
2059.5	0.62661
2059	0.58807
2058.5	0.59417
2058	0.5904
2057.5	0.60001
2057	0.60287
2056.5	0.58965
2056	0.6017
2055.5	0.57901
2055	0.59539
2054.5	0.59834
2054	0.59953
2053.5	0.5678
2053	0.57153
2052.5	0.55128
2052	0.57088
2051.5	0.5822
2051	0.59237
2050.5	0.5727
2050	0.59528
2049.5	0.62101
2049	0.6824
2048.5	0.67066
2048	0.67467
2047.5	0.69338
2047	0.71111
2046.5	0.77649
2046	0.76412
2045.5	0.78386
2045	0.78789
2044.5	0.8345
2044	0.88347
2043.5	0.91485
2043	0.91176
2042.5	0.93628
2042	0.93423
2041.5	0.92171
2041	0.97408
2040.5	0.99485
2040	1
2039.5	0.96398
2039	0.92446
2038.5	0.92825
2038	0.94193
2037.5	0.97294
2037	0.96594
2036.5	0.92429
2036	0.87983
2035.5	0.85987
2035	0.82338
2034.5	0.86489
2034	0.80731
2033.5	0.83499
2033	0.80201
2032.5	0.74615
2032	0.73099
2031.5	0.71618
2031	0.70359
2030.5	0.75062
2030	0.71685
2029.5	0.71357
2029	0.7067
2028.5	0.69365
2028	0.69589
2027.5	0.68369
2027	0.67217
2026.5	0.64531
2026	0.61971
2025.5	0.59401
2025	0.57188
2024.5	0.58077
2024	0.57678
2023.5	0.57454
2023	0.56253
2022.5	0.55021
2022	0.5658
2021.5	0.54432
2021	0.55062
2020.5	0.5265
2020	0.51984
2019.5	0.49719
2019	0.47019
2018.5	0.46769
2018	0.46906
2017.5	0.47096
2017	0.46187
2016.5	0.48135
2016	0.489
2015.5	0.49753
2015	0.46184
2014.5	0.46147
2014	0.46636
2013.5	0.48069
2013	0.48188
2012.5	0.48404
2012	0.45961
2011.5	0.44692
2011	0.45317
2010.5	0.47656
2010	0.49726
2009.5	0.51753
2009	0.50244
2008.5	0.49638
2008	0.48741
2007.5	0.51643
2007	0.50904
2006.5	0.52887
2006	0.52707
2005.5	0.5388
2005	0.5152
2004.5	0.50896
2004	0.53013
2003.5	0.51202
2003	0.49786
2002.5	0.50258
2002	0.51125
2001.5	0.52873
2001	0.5425
2000.5	0.5381
2000	0.54948
1999.5	0.53452
1999	0.55727
1998.5	0.55587
1998	0.56184
1997.5	0.56639
1997	0.57022
1996.5	0.60385
1996	0.63607
1995.5	0.60894
1995	0.60822
1994.5	0.62215
1994	0.64948
1993.5	0.65423
1993	0.66322
1992.5	0.64777
1992	0.68792
1991.5	0.70066
1991	0.71677
1990.5	0.69477
1990	0.67952
1989.5	0.67249
1989	0.68284
1988.5	0.69022
1988	0.68075
1987.5	0.70385
1987	0.7326
1986.5	0.72689
1986	0.74591
1985.5	0.72102
1985	0.76762
1984.5	0.76536
1984	0.73747
1983.5	0.70348
1983	0.67676
1982.5	0.65552
1982	0.7
1981.5	0.73052
1981	0.74283
1980.5	0.7052
1980	0.67428
1979.5	0.65819
1979	0.62347
1978.5	0.62364
1978	0.64726
1977.5	0.62187
1977	0.65203
1976.5	0.63964
1976	0.62106
1975.5	0.61503
1975	0.59506
1974.5	0.60377
1974	0.59268
1973.5	0.58011
1973	0.61116
1972.5	0.63269
1972	0.63778
1971.5	0.63599
1971	0.59975
1970.5	0.59835
1970	0.57246
1969.5	0.56928
1969	0.56899
1968.5	0.58555
1968	0.6415
1967.5	0.65691
1967	0.69554
1966.5	0.67966
1966	0.68743
1965.5	0.70367
1965	0.70167
1964.5	0.7098
1964	0.70394
1963.5	0.71039
1963	0.71449
1962.5	0.69271
1962	0.68112
1961.5	0.66742
1961	0.67439
1960.5	0.63617
1960	0.60744
1959.5	0.58784
1959	0.61245
1958.5	0.62415
1958	0.61442
1957.5	0.5752
1957	0.53704
1956.5	0.51943
1956	0.5303
1955.5	0.53249
1955	0.53557
1954.5	0.5797
1954	0.53463
1953.5	0.52567
1953	0.5191
1952.5	0.51726
1952	0.48273
1951.5	0.46349
1951	0.47024
1950.5	0.4932
1950	0.50754
1949.5	0.48036
1949	0.50606
1948.5	0.50766
1948	0.53171
1947.5	0.50901
1947	0.48721
1946.5	0.46845
1946	0.48077
1945.5	0.48447
1945	0.50333
1944.5	0.48513
1944	0.46395
1943.5	0.44081
1943	0.42006
1942.5	0.436
1942	0.43092
1941.5	0.41867
1941	0.4348
1940.5	0.43093
1940	0.44006
1939.5	0.4446
1939	0.43766
1938.5	0.44501
1938	0.42801
1937.5	0.424
1937	0.38778
1936.5	0.4022
1936	0.4142
1935.5	0.45563
1935	0.44078
1934.5	0.41365
1934	0.40195
1933.5	0.40724
1933	0.41549
1932.5	0.43639
1932	0.4298
1931.5	0.41389
1931	0.39786
1930.5	0.38387
1930	0.39643
1929.5	0.41379
1929	0.42639
1928.5	0.40384
1928	0.38521
1927.5	0.3779
1927	0.38489
1926.5	0.38938
1926	0.39449
1925.5	0.40968
1925	0.41417
1924.5	0.39335
1924	0.37337
1923.5	0.37769
1923	0.35894
1922.5	0.41082
1922	0.43188
1921.5	0.42866
1921	0.42212
1920.5	0.41579
1920	0.43429
1919.5	0.41599
1919	0.4066
1918.5	0.41865
1918	0.42397
1917.5	0.43225
1917	0.42288
1916.5	0.42123
1916	0.41421
1915.5	0.37978
1915	0.38243
1914.5	0.40234
1914	0.40961
1913.5	0.4377
1913	0.45744
1912.5	0.46464
1912	0.46575
1911.5	0.4614
1911	0.49894
1910.5	0.50449
1910	0.47835
1909.5	0.45906
1909	0.43143
1908.5	0.44798
1908	0.45784
1907.5	0.46738
1907	0.47889
1906.5	0.46961
1906	0.45044
1905.5	0.45348
1905	0.45839
1904.5	0.4315
1904	0.42284
1903.5	0.40748
1903	0.4139
1902.5	0.4037
1902	0.39016
1901.5	0.34611
1901	0.3617
1900.5	0.38635
1900	0.36947
1899.5	0.34242
1899	0.33479
1898.5	0.32339
1898	0.32023
1897.5	0.31401
1897	0.29978
1896.5	0.30342
1896	0.29368
1895.5	0.29936
1895	0.28765
1894.5	0.28035
1894	0.26705
1893.5	0.27114
1893	0.26938
1892.5	0.25798
1892	0.23509
1891.5	0.23464
1891	0.23529
1890.5	0.24954
1890	0.24697
1889.5	0.25298
1889	0.24681
1888.5	0.24824
1888	0.23798
1887.5	0.22938
1887	0.22629
1886.5	0.23291
1886	0.22711
1885.5	0.20996
1885	0.20685
1884.5	0.21258
1884	0.20689
1883.5	0.20749
1883	0.19554
1882.5	0.19944
1882	0.201
1881.5	0.20908
1881	0.20839
1880.5	0.20363
1880	0.19806
1879.5	0.18394
1879	0.17004
1878.5	0.1687
1878	0.17893
1877.5	0.17957
1877	0.18511
1876.5	0.17331
1876	0.176
1875.5	0.1627
1875	0.15716
1874.5	0.14624
1874	0.13657
1873.5	0.14487
1873	0.14528
1872.5	0.15107
1872	0.14182
1871.5	0.14805
1871	0.14249
1870.5	0.13878
1870	0.13255
1869.5	0.126
1869	0.12576
1868.5	0.12773
1868	0.13099
1867.5	0.13443
1867	0.12409
1866.5	0.13424
1866	0.12382
1865.5	0.11693
1865	0.11757
1864.5	0.11534
1864	0.12051
1863.5	0.11866
1863	0.11375
1862.5	0.10875
1862	0.10379
1861.5	0.09885
1861	0.09422
1860.5	0.0931
1860	0.09266
1859.5	0.09291
1859	0.08759
1858.5	0.08818
1858	0.09104
1857.5	0.09252
1857	0.09209
1856.5	0.08784
1856	0.08974
1855.5	0.08684
1855	0.08921
1854.5	0.08576
1854	0.08436
1853.5	0.07934
1853	0.07948
1852.5	0.07391
1852	0.07921
1851.5	0.07806
1851	0.0812
1850.5	0.08382
1850	0.08007
1849.5	0.07913
1849	0.06918
1848.5	0.07138
1848	0.06925
1847.5	0.0721
1847	0.07252
1846.5	0.07223
1846	0.07605
1845.5	0.07157
1845	0.07148
1844.5	0.06498
1844	0.06704
1843.5	0.06476
1843	0.06236
1842.5	0.05791
1842	0.05757
1841.5	0.06138
1841	0.06331
1840.5	0.05436
1840	0.05203
1839.5	0.05211
1839	0.06072
1838.5	0.0641
1838	0.0626
1837.5	0.0585
1837	0.05653
1836.5	0.05367
1836	0.05211
1835.5	0.0531
1835	0.05446
1834.5	0.06023
1834	0.05675
1833.5	0.05151
1833	0.04921
1832.5	0.04417
1832	0.04091
1831.5	0.04498
1831	0.0479
1830.5	0.05066
1830	0.05085
1829.5	0.05153
1829	0.05193
1828.5	0.04781
1828	0.04307
1827.5	0.04153
1827	0.03846
1826.5	0.0426
1826	0.04111
1825.5	0.04234
1825	0.03494
1824.5	0.03369
1824	0.03459
1823.5	0.0323
1823	0.03852
1822.5	0.03331
1822	0.03528
1821.5	0.03347
1821	0.03326
1820.5	0.03772
1820	0.03168
1819.5	0.03158
1819	0.03022
1818.5	0.03689
1818	0.03741
1817.5	0.03822
1817	0.03639
1816.5	0.03875
1816	0.03416
1815.5	0.03268
1815	0.02792
1814.5	0.02754
1814	0.02747
1813.5	0.03158
1813	0.03014
1812.5	0.03115
1812	0.02865
1811.5	0.02989
1811	0.02855
1810.5	0.03128
1810	0.03385
1809.5	0.03082
1809	0.03007
1808.5	0.0307
1808	0.02835
1807.5	0.02622
1807	0.02606
1806.5	0.02842
1806	0.02478
1805.5	0.02851
1805	0.02502
1804.5	0.02882
1804	0.02305
1803.5	0.02537
1803	0.02476
1802.5	0.02494
1802	0.02796
1801.5	0.02801
1801	0.02685
1800.5	0.02296
1800	0.0257
1799.5	0.0235
1799	0.02708
1798.5	0.02328
1798	0.0289
1797.5	0.02588
1797	0.02704
1796.5	0.0249
1796	0.02759
1795.5	0.02309
1795	0.0197
1794.5	0.02137
1794	0.02219
1793.5	0.02493
1793	0.02298
1792.5	0.02435
1792	0.01938
1791.5	0.0189
1791	0.01577
1790.5	0.01706
1790	0.01701
1789.5	0.01621
1789	0.0149
1788.5	0.0157
1788	0.01695
1787.5	0.01575
1787	0.01685
1786.5	0.01704
1786	0.01796
1785.5	0.01716
1785	0.019
1784.5	0.01917
1784	0.02013
1783.5	0.02112
1783	0.01696
1782.5	0.01271
1782	0.01341
1781.5	0.01551
1781	0.0165
1780.5	0.01982
1780	0.01817
1779.5	0.01884
1779	0.01492
1778.5	0.01618
1778	0.01367
1777.5	0.01526
1777	0.01428
1776.5	0.01785
1776	0.0209
1775.5	0.01866
1775	0.01634
1774.5	0.01337
1774	0.01425
1773.5	0.01427
1773	0.01524
1772.5	0.01412
1772	0.01317
1771.5	0.01375
1771	0.01527
1770.5	0.01461
1770	0.01584
1769.5	0.01358
1769	0.01178
1768.5	0.01111
1768	0.01159
1767.5	0.01374
1767	0.01232
1766.5	0.01174
1766	0.01071
1765.5	0.01056
1765	0.01228
1764.5	0.01326
1764	0.01519
1763.5	0.01078
1763	0.00828
1762.5	0.00634
1762	0.00711
1761.5	0.00682
1761	0.00733
1760.5	0.00852
1760	0.00886
1759.5	0.01257
1759	0.01198
1758.5	0.01239
1758	0.01145
1757.5	0.01048
1757	0.0133
1756.5	0.00865
1756	0.00902
1755.5	0.01028
1755	0.01009
1754.5	0.01
1754	0.0089
1753.5	0.0088
1753	0.00845
1752.5	0.00794
1752	0.00727
1751.5	0.00984
1751	0.00964
1750.5	0.00846
1750	0.0045
1749.5	0.00392
1749	0.00417
1748.5	0.00711
1748	0.01044
1747.5	0.00836
1747	0.00688
1746.5	0.00507
1746	0.00782
1745.5	0.00737
1745	0.00833
1744.5	0.00742
1744	0.00706
1743.5	0.0075
1743	0.00667
1742.5	0.00785
1742	0.00739
1741.5	0.00976
1741	0.00957
1740.5	0.00813
1740	0.00759
1739.5	0.00757
1739	0.00691
1738.5	0.00751
1738	0.00708
1737.5	0.00771
1737	0.00559
1736.5	0.00574
1736	0.00701
1735.5	0.0095
1735	0.01132
1734.5	0.00964
1734	0.00829
1733.5	0.00511
1733	0.00586
1732.5	0.00599
1732	0.00687
1731.5	0.00552
1731	0.0036
1730.5	0.00508
1730	0.00773
1729.5	0.01036
1729	0.00764
1728.5	0.00695
1728	0.005
1727.5	0.00571
1727	0.00606
1726.5	0.00667
1726	0.00625
1725.5	0.00602
1725	0.00512
1724.5	0.00384
1724	0.00418
1723.5	0.00692
1723	0.00653
1722.5	0.00597
1722	0.00575
1721.5	0.00528
1721	0.00506
1720.5	0.00764
1720	0.00846
1719.5	0.00936
1719	0.00867
1718.5	0.00978
1718	0.00707
1717.5	0.00608
1717	0.00809
1716.5	0.00796
1716	0.00717
1715.5	0.00426
1715	0.00876
1714.5	0.00824
1714	0.00799
1713.5	0.00849
1713	0.00848
1712.5	0.00832
1712	0.00578
1711.5	0.00666
1711	0.00568
1710.5	0.00918
1710	0.01131
1709.5	0.01241
1709	0.01143
1708.5	0.00858
1708	0.00448
1707.5	0.00315
1707	0.0054
1706.5	0.00879
1706	0.00481
1705.5	0.000451146
1705	0
1704.5	0.00443
1704	0.00838
1703.5	0.00759
1703	0.00356
1702.5	0.00352
1702	0.00449
1701.5	0.00766
1701	0.01144
1700.5	0.01067
1700	0.01015
1699.5	0.01105
1699	0.00772
1698.5	0.00833
1698	0.00721
1697.5	0.00778
1697	0.00946
1696.5	0.00904
1696	0.00793
1695.5	0.00626
1695	0.00669
1694.5	0.00784
1694	0.01253
1693.5	0.01094
1693	0.00877
1692.5	0.00483
1692	0.00511
1691.5	0.00433
1691	0.00705
1690.5	0.00555
1690	0.00586
1689.5	0.0021
1689	0.0041
1688.5	0.0059
1688	0.00677
1687.5	0.00743
1687	0.01013
1686.5	0.0144
1686	0.01036
1685.5	0.01067
1685	0.00465
1684.5	0.00664
1684	0.00642
1683.5	0.00986
1683	0.011
1682.5	0.01209
1682	0.01005
1681.5	0.00763
1681	0.00942
1680.5	0.00753
1680	0.01037
1679.5	0.00972
1679	0.00764
1678.5	0.00607
1678	0.00815
1677.5	0.01041
1677	0.01047
1676.5	0.00854
1676	0.00722
1675.5	0.00947
1675	0.00767
1674.5	0.00964
1674	0.00788
1673.5	0.00602
1673	0.00668
1672.5	0.00394
1672	0.00591
1671.5	0.0043
1671	0.00592
1670.5	0.00582
1670	0.00692
1669.5	0.00813
1669	0.01043
1668.5	0.01253
1668	0.01356
1667.5	0.01143
1667	0.00743
1666.5	0.00451
1666	0.00446
1665.5	0.00687
1665	0.00826
1664.5	0.00977
1664	0.00809
1663.5	0.00808
1663	0.00946
1662.5	0.01007
1662	0.01107
1661.5	0.01312
1661	0.01245
1660.5	0.01286
1660	0.01405
1659.5	0.01514
1659	0.01478
1658.5	0.01045
1658	0.00844
1657.5	0.00533
1657	0.00672
1656.5	0.0064
1656	0.00839
1655.5	0.01238
1655	0.0127
1654.5	0.01322
1654	0.01396
1653.5	0.01319
1653	0.01315
1652.5	0.01008
1652	0.01255
1651.5	0.01049
1651	0.01125
1650.5	0.00944
1650	0.0086
1649.5	0.00757
1649	0.0099
1648.5	0.00908
1648	0.01362
1647.5	0.01168
1647	0.01575
1646.5	0.01382
1646	0.01436
1645.5	0.01339
1645	0.01085
1644.5	0.01102
1644	0.01035
1643.5	0.0104
1643	0.00943
1642.5	0.01006
1642	0.01055
1641.5	0.01252
1641	0.01164
1640.5	0.01077
1640	0.00939
1639.5	0.01307
1639	0.0128
1638.5	0.01076
1638	0.01273
1637.5	0.01077
1637	0.01367
1636.5	0.01269
1636	0.01194
1635.5	0.01005
1635	0.01063
1634.5	0.01261
1634	0.01265
1633.5	0.01456
1633	0.01263
1632.5	0.01308
1632	0.0116
1631.5	0.01167
1631	0.01224
1630.5	0.01182
1630	0.01374
1629.5	0.01568
1629	0.01496
1628.5	0.01386
1628	0.01242
1627.5	0.0122
1627	0.01224
1626.5	0.01444
1626	0.01326
1625.5	0.014
1625	0.0133
1624.5	0.01234
1624	0.01415
1623.5	0.01211
1623	0.01217
1622.5	0.01059
1622	0.01051
1621.5	0.01484
1621	0.01398
1620.5	0.01546
1620	0.01527
1619.5	0.01537
1619	0.01536
1618.5	0.01645
1618	0.01559
1617.5	0.01513
1617	0.01459
1616.5	0.01602
1616	0.01674
1615.5	0.01784
1615	0.01643
1614.5	0.0131
1614	0.01563
1613.5	0.01759
1613	0.01806
1612.5	0.01745
1612	0.01613
1611.5	0.01679
1611	0.01538
1610.5	0.01351
1610	0.01366
1609.5	0.01388
1609	0.0171
1608.5	0.01739
1608	0.01718
1607.5	0.01476
1607	0.01634
1606.5	0.01547
1606	0.01835
1605.5	0.01661
1605	0.01735
1604.5	0.01713
1604	0.01621
1603.5	0.01536
1603	0.0135
1602.5	0.01486
1602	0.01638
1601.5	0.0181
1601	0.01985
1600.5	0.01848
1600	0.01838
1599.5	0.01714
1599	0.01814
1598.5	0.02033
1598	0.01916
1597.5	0.01528
1597	0.01404
1596.5	0.01689
1596	0.01592
1595.5	0.01624
1595	0.01363
1594.5	0.01379
1594	0.01756
1593.5	0.01916
1593	0.02113
1592.5	0.01837
1592	0.01619
1591.5	0.01867
1591	0.02124
1590.5	0.02129
1590	0.01973
1589.5	0.01849
1589	0.01787
1588.5	0.01828
1588	0.01773
1587.5	0.02061
1587	0.01942
1586.5	0.02104
1586	0.01705
1585.5	0.01684
1585	0.01715
1584.5	0.02038
1584	0.02106
1583.5	0.02196
1583	0.02204
1582.5	0.02413
1582	0.02258
1581.5	0.02497
1581	0.02228
1580.5	0.02155
1580	0.02057
1579.5	0.0229
1579	0.02232
1578.5	0.0223
1578	0.02147
1577.5	0.02291
1577	0.02255
1576.5	0.02248
1576	0.0219
1575.5	0.02079
1575	0.02066
1574.5	0.01875
1574	0.02161
1573.5	0.02429
1573	0.02282
1572.5	0.02461
1572	0.02422
1571.5	0.02504
1571	0.02362
1570.5	0.02215
1570	0.02244
1569.5	0.02361
1569	0.02506
1568.5	0.02483
1568	0.02434
1567.5	0.02387
1567	0.02715
1566.5	0.02559
1566	0.0252
1565.5	0.02549
1565	0.02425
1564.5	0.0264
1564	0.02486
1563.5	0.02622
1563	0.0276
1562.5	0.02981
1562	0.02703
1561.5	0.02734
1561	0.02568
1560.5	0.02626
1560	0.02786
1559.5	0.02654
1559	0.02785
1558.5	0.02603
1558	0.02854
1557.5	0.02899
1557	0.02789
1556.5	0.02659
1556	0.02748
1555.5	0.02755
1555	0.02896
1554.5	0.02832
1554	0.02976
1553.5	0.0284
1553	0.02905
1552.5	0.02792
1552	0.02994
1551.5	0.02993
1551	0.03176
1550.5	0.03138
1550	0.03161
1549.5	0.02863
1549	0.02961
1548.5	0.03076
1548	0.03312
1547.5	0.03377
1547	0.03185
1546.5	0.03184
1546	0.03284
1545.5	0.0336
1545	0.03194
1544.5	0.03223
1544	0.03205
1543.5	0.03203
1543	0.03332
1542.5	0.03176
1542	0.03393
1541.5	0.03352
1541	0.0368
1540.5	0.03612
1540	0.03543
1539.5	0.03565
1539	0.03492
1538.5	0.03389
1538	0.03539
1537.5	0.03512
1537	0.03705
1536.5	0.038
1536	0.03951
1535.5	0.03894
1535	0.03804
1534.5	0.03559
1534	0.03509
1533.5	0.03756
1533	0.03938
1532.5	0.04107
1532	0.04074
1531.5	0.04162
1531	0.04341
1530.5	0.04073
1530	0.04021
1529.5	0.03862
1529	0.04086
1528.5	0.0413
1528	0.04117
1527.5	0.04044
1527	0.0398
1526.5	0.03989
1526	0.04106
1525.5	0.04386
1525	0.04367
1524.5	0.04456
1524	0.0452
1523.5	0.04646
1523	0.04691
1522.5	0.04425
1522	0.04741
1521.5	0.04756
1521	0.04831
1520.5	0.04934
1520	0.04678
1519.5	0.04489
1519	0.04526
1518.5	0.04595
1518	0.04727
1517.5	0.04685
1517	0.04828
1516.5	0.04847
1516	0.04739
1515.5	0.04543
1515	0.04632
1514.5	0.04769
1514	0.05069
1513.5	0.05129
1513	0.05413
1512.5	0.05329
1512	0.05344
1511.5	0.05102
1511	0.05148
1510.5	0.05135
1510	0.05163
1509.5	0.05148
1509	0.0512
1508.5	0.0522
1508	0.05191
1507.5	0.05226
1507	0.05204
1506.5	0.05405
1506	0.05734
1505.5	0.05465
1505	0.05504
1504.5	0.05426
1504	0.05611
1503.5	0.05387
1503	0.05356
1502.5	0.05535
1502	0.05556
1501.5	0.05531
1501	0.05418
1500.5	0.05575
[truncated: 2,601 more rows]

## Sheet: Eu2O3
2500	0.01367		Eu2O3
2499.5	0.01301
2499	0.01598
2498.5	0.01388
2498	0.01401
2497.5	0.01016
2497	0.01278
2496.5	0.01356
2496	0.0122
2495.5	0.01261
2495	0.01584
2494.5	0.01492
2494	0.01439
2493.5	0.01281
2493	0.01134
2492.5	0.0123
2492	0.01049
2491.5	0.01114
2491	0.00923
2490.5	0.00799
2490	0.00725
2489.5	0.01258
2489	0.01223
2488.5	0.01375
2488	0.01525
2487.5	0.01178
2487	0.00904
2486.5	0.00848
2486	0.00565
2485.5	0.00645
2485	0.00529
2484.5	0.00809
2484	0.01004
2483.5	0.01182
2483	0.01368
2482.5	0.00788
2482	0.00936
2481.5	0.00688
2481	0.00751
2480.5	0.00811
2480	0.00579
2479.5	0.00686
2479	0.00827
2478.5	0.01047
2478	0.01465
2477.5	0.01224
2477	0.01152
2476.5	0.01204
2476	0.01254
2475.5	0.01057
2475	0.00739
2474.5	0.00925
2474	0.00965
2473.5	0.01269
2473	0.01064
2472.5	0.00854
2472	0.00689
2471.5	0.0052
2471	0.00656
2470.5	0.00708
2470	0.00721
2469.5	0.00794
2469	0.00691
2468.5	0.00564
2468	0.00825
2467.5	0.00822
2467	0.00673
2466.5	0.00718
2466	0.00825
2465.5	0.00795
2465	0.0071
2464.5	0.00572
2464	0.0075
2463.5	0.00548
2463	0.00367
2462.5	0.00391
2462	0.00385
2461.5	0.00708
2461	0.00187
2460.5	0.00477
2460	0.00695
2459.5	0.00815
2459	0.01106
2458.5	0.00918
2458	0.00867
2457.5	0.01038
2457	0.00852
2456.5	0.00869
2456	0.00751
2455.5	0.00805
2455	0.00726
2454.5	0.00608
2454	0.00669
2453.5	0.00378
2453	0.00511
2452.5	0.00333
2452	0.00499
2451.5	0.00335
2451	0.00482
2450.5	0.00585
2450	0.00462
2449.5	0.00607
2449	0.00523
2448.5	0.00627
2448	0.00566
2447.5	0.00298
2447	0.00164
2446.5	0.00243
2446	0.00475
2445.5	0.00548
2445	0.00586
2444.5	0.00643
2444	0.01003
2443.5	0.00913
2443	0.00716
2442.5	0.00512
2442	0.00301
2441.5	0.00393
2441	0.00393
2440.5	0.00636
2440	0.00641
2439.5	0.00473
2439	0.00511
2438.5	0.00656
2438	0.00483
2437.5	0.000978845
2437	0.00169
2436.5	0.00173
2436	0.00384
2435.5	0.00625
2435	0.00462
2434.5	0.00641
2434	0.00623
2433.5	0.00764
2433	0.00633
2432.5	0.00601
2432	0.00533
2431.5	0.00599
2431	0.00608
2430.5	0.00515
2430	0.00405
2429.5	0.00285
2429	0.000968857
2428.5	0.000219741
2428	0.00176
2427.5	0.00221
2427	0.0021
2426.5	0.00206
2426	0.00342
2425.5	0.00386
2425	0.00575
2424.5	0.00359
2424	0.00425
2423.5	0.00591
2423	0.00777
2422.5	0.0079
2422	0.00533
2421.5	0.00767
2421	0.00801
2420.5	0.01127
2420	0.00725
2419.5	0.00594
2419	0.008
2418.5	0.00861
2418	0.00874
2417.5	0.00793
2417	0.00844
2416.5	0.0105
2416	0.01103
2415.5	0.01173
2415	0.00854
2414.5	0.00786
2414	0.00809
2413.5	0.00687
2413	0.00519
2412.5	0.00376
2412	0.0043
2411.5	0.00576
2411	0.00602
2410.5	0.00536
2410	0.00597
2409.5	0.00795
2409	0.00963
2408.5	0.00838
2408	0.00812
2407.5	0.00848
2407	0.00969
2406.5	0.00753
2406	0.00544
2405.5	0.00366
2405	0.0064
2404.5	0.00743
2404	0.00384
2403.5	0.00573
2403	0.00729
2402.5	0.00962
2402	0.00925
2401.5	0.01017
2401	0.01031
2400.5	0.00991
2400	0.00942
2399.5	0.00886
2399	0.00792
2398.5	0.00802
2398	0.00671
2397.5	0.006
2397	0.00723
2396.5	0.0058
2396	0.00761
2395.5	0.00726
2395	0.00906
2394.5	0.00859
2394	0.00887
2393.5	0.00929
2393	0.01005
2392.5	0.01154
2392	0.01097
2391.5	0.01133
2391	0.0142
2390.5	0.01395
2390	0.01543
2389.5	0.01517
2389	0.01443
2388.5	0.01453
2388	0.01465
2387.5	0.01392
2387	0.01568
2386.5	0.01404
2386	0.01541
2385.5	0.01487
2385	0.01328
2384.5	0.01466
2384	0.01472
2383.5	0.01611
2383	0.01712
2382.5	0.01799
2382	0.01868
2381.5	0.01997
2381	0.02004
2380.5	0.0201
2380	0.0182
2379.5	0.0172
2379	0.01666
2378.5	0.01628
2378	0.01556
2377.5	0.01414
2377	0.015
2376.5	0.01454
2376	0.01356
2375.5	0.01378
2375	0.01442
2374.5	0.01432
2374	0.0136
2373.5	0.01638
2373	0.01535
2372.5	0.01693
2372	0.01541
2371.5	0.01666
2371	0.01872
2370.5	0.01798
2370	0.01639
2369.5	0.01656
2369	0.01628
2368.5	0.0158
2368	0.01508
2367.5	0.01395
2367	0.01398
2366.5	0.01451
2366	0.01436
2365.5	0.01442
2365	0.01369
2364.5	0.01488
2364	0.01504
2363.5	0.01468
2363	0.01596
2362.5	0.01468
2362	0.0145
2361.5	0.01502
2361	0.0139
2360.5	0.01258
2360	0.01255
2359.5	0.01077
2359	0.01083
2358.5	0.00992
2358	0.01103
2357.5	0.00917
2357	0.00971
2356.5	0.00965
2356	0.01087
2355.5	0.00989
2355	0.00872
2354.5	0.00843
2354	0.00659
2353.5	0.0081
2353	0.00726
2352.5	0.00689
2352	0.00731
2351.5	0.00842
2351	0.00756
2350.5	0.00912
2350	0.01053
2349.5	0.00952
2349	0.01023
2348.5	0.01067
2348	0.00974
2347.5	0.01171
2347	0.01086
2346.5	0.01009
2346	0.01166
2345.5	0.01179
2345	0.01201
2344.5	0.0111
2344	0.00848
2343.5	0.00909
2343	0.00809
2342.5	0.00825
2342	0.00871
2341.5	0.0106
2341	0.0113
2340.5	0.01056
2340	0.01156
2339.5	0.01098
2339	0.01031
2338.5	0.00913
2338	0.00834
2337.5	0.00891
2337	0.00995
2336.5	0.01062
2336	0.00973
2335.5	0.01142
2335	0.01056
2334.5	0.00919
2334	0.00945
2333.5	0.00995
2333	0.00989
2332.5	0.01089
2332	0.01197
2331.5	0.01411
2331	0.01314
2330.5	0.01144
2330	0.01226
2329.5	0.01226
2329	0.01055
2328.5	0.01073
2328	0.01011
2327.5	0.0109
2327	0.01049
2326.5	0.01252
2326	0.01377
2325.5	0.01271
2325	0.01196
2324.5	0.01218
2324	0.01171
2323.5	0.01082
2323	0.00917
2322.5	0.00986
2322	0.00991
2321.5	0.01004
2321	0.01114
2320.5	0.01097
2320	0.01055
2319.5	0.00854
2319	0.00833
2318.5	0.00879
2318	0.00863
2317.5	0.00804
2317	0.00738
2316.5	0.0079
2316	0.00827
2315.5	0.00583
2315	0.00513
2314.5	0.00689
2314	0.00714
2313.5	0.00865
2313	0.00714
2312.5	0.00713
2312	0.00623
2311.5	0.00483
2311	0.00409
2310.5	0.00367
2310	0.00218
2309.5	0.00282
2309	0.00254
2308.5	0.00354
2308	0.00416
2307.5	0.0036
2307	0.00252
2306.5	0.0024
2306	0.00315
2305.5	0.00297
2305	0.00211
2304.5	0.00233
2304	0.00251
2303.5	0.00245
2303	0.00341
2302.5	0.00315
2302	0.00411
2301.5	0.00592
2301	0.00519
2300.5	0.00592
2300	0.00483
2299.5	0.00323
2299	0.00313
2298.5	0.00221
2298	0.00182
2297.5	0.000888951
2297	0.000858986
2296.5	0.000868975
2296	0.000179788
2295.5	0.00145
2295	0.00116
2294.5	0.000539364
2294	0
2293.5	0.000609281
2293	0.00129
2292.5	0.00151
2292	0.00234
2291.5	0.00232
2291	0.00323
2290.5	0.005
2290	0.00618
2289.5	0.0054
2289	0.0048
2288.5	0.00482
2288	0.00505
2287.5	0.00494
2287	0.00422
2286.5	0.00467
2286	0.00548
2285.5	0.00623
2285	0.00729
2284.5	0.00599
2284	0.00619
2283.5	0.0056
2283	0.00542
2282.5	0.00399
2282	0.00277
2281.5	0.00348
2281	0.00444
2280.5	0.0044
2280	0.00478
2279.5	0.00617
2279	0.00735
2278.5	0.0077
2278	0.00836
2277.5	0.00684
2277	0.00745
2276.5	0.00745
2276	0.00624
2275.5	0.00618
2275	0.00552
2274.5	0.00544
2274	0.0048
2273.5	0.00519
2273	0.00485
2272.5	0.00487
2272	0.00526
2271.5	0.0047
2271	0.00493
2270.5	0.00521
2270	0.00495
2269.5	0.0047
2269	0.00473
2268.5	0.00468
2268	0.00508
2267.5	0.00585
2267	0.00579
2266.5	0.00597
2266	0.00526
2265.5	0.00658
2265	0.00597
2264.5	0.00543
2264	0.00525
2263.5	0.00587
2263	0.00541
2262.5	0.00523
2262	0.00483
2261.5	0.00489
2261	0.00556
2260.5	0.00532
2260	0.0059
2259.5	0.00739
2259	0.00777
2258.5	0.00794
2258	0.00831
2257.5	0.00875
2257	0.00902
2256.5	0.00964
2256	0.01006
2255.5	0.01078
2255	0.01111
2254.5	0.01224
2254	0.01164
2253.5	0.0115
2253	0.0125
2252.5	0.01346
2252	0.01321
2251.5	0.01347
2251	0.0145
2250.5	0.01569
2250	0.01538
2249.5	0.00387
2249	0.00631
2248.5	0.00684
2248	0.00832
2247.5	0.00936
2247	0.00997
2246.5	0.01065
2246	0.00896
2245.5	0.00497
2245	0.00224
2244.5	0.00266
2244	0.00706
2243.5	0.01162
2243	0.01435
2242.5	0.01735
2242	0.02253
2241.5	0.02417
2241	0.02294
2240.5	0.0276
2240	0.02814
2239.5	0.03071
2239	0.03694
2238.5	0.03541
2238	0.03773
2237.5	0.03718
2237	0.04077
2236.5	0.03827
2236	0.03829
2235.5	0.03726
2235	0.04083
2234.5	0.04118
2234	0.03874
2233.5	0.04309
2233	0.0456
2232.5	0.04804
2232	0.05248
2231.5	0.05489
2231	0.05998
2230.5	0.06492
2230	0.06795
2229.5	0.06927
2229	0.07247
2228.5	0.07463
2228	0.07796
2227.5	0.0805
2227	0.08007
2226.5	0.0813
2226	0.08719
2225.5	0.09002
2225	0.09514
2224.5	0.0962
2224	0.0984
2223.5	0.10249
2223	0.10432
2222.5	0.10688
2222	0.10743
2221.5	0.1087
2221	0.10974
2220.5	0.11352
2220	0.11437
2219.5	0.11462
2219	0.11765
2218.5	0.12007
2218	0.11895
2217.5	0.12281
2217	0.12459
2216.5	0.12741
2216	0.13119
2215.5	0.13436
2215	0.13926
2214.5	0.1424
2214	0.14691
2213.5	0.14875
2213	0.15126
2212.5	0.15139
2212	0.15451
2211.5	0.15614
2211	0.15991
2210.5	0.15846
2210	0.16222
2209.5	0.16372
2209	0.16314
2208.5	0.16488
2208	0.16909
2207.5	0.1681
2207	0.16853
2206.5	0.17181
2206	0.17414
2205.5	0.17484
2205	0.17281
2204.5	0.17452
2204	0.17554
2203.5	0.17529
2203	0.18226
2202.5	0.179
2202	0.17999
2201.5	0.17719
2201	0.17909
2200.5	0.18294
2200	0.18087
2199.5	0.17999
2199	0.17896
2198.5	0.18249
2198	0.18097
2197.5	0.18319
2197	0.17962
2196.5	0.17523
2196	0.17561
2195.5	0.17768
2195	0.17223
2194.5	0.16987
2194	0.16811
2193.5	0.168
2193	0.16867
2192.5	0.16829
2192	0.15991
2191.5	0.15974
2191	0.15886
2190.5	0.16193
2190	0.16249
2189.5	0.1601
2189	0.15667
2188.5	0.15412
2188	0.15813
2187.5	0.15696
2187	0.15602
2186.5	0.15242
2186	0.15112
2185.5	0.15296
2185	0.15128
2184.5	0.14648
2184	0.14726
2183.5	0.14512
2183	0.1438
2182.5	0.14404
2182	0.14418
2181.5	0.14192
2181	0.14218
2180.5	0.13893
2180	0.13804
2179.5	0.13803
2179	0.13852
2178.5	0.1375
2178	0.13647
2177.5	0.13688
2177	0.14072
2176.5	0.1392
2176	0.14047
2175.5	0.13601
2175	0.13424
2174.5	0.13685
2174	0.13761
2173.5	0.13272
2173	0.12958
2172.5	0.12386
2172	0.12618
2171.5	0.11896
2171	0.11702
2170.5	0.11218
2170	0.10847
2169.5	0.10637
2169	0.10571
2168.5	0.09945
2168	0.09478
2167.5	0.09571
2167	0.09504
2166.5	0.09672
2166	0.0944
2165.5	0.09101
2165	0.08993
2164.5	0.08827
2164	0.08638
2163.5	0.08594
2163	0.085
2162.5	0.08679
2162	0.08726
2161.5	0.08794
2161	0.08274
2160.5	0.0781
2160	0.07438
2159.5	0.07419
2159	0.07077
2158.5	0.06648
2158	0.06564
2157.5	0.06568
2157	0.06151
2156.5	0.05998
2156	0.05461
2155.5	0.0535
2155	0.04924
2154.5	0.04639
2154	0.05296
2153.5	0.054
2153	0.05134
2152.5	0.05685
2152	0.05902
2151.5	0.06132
2151	0.06017
2150.5	0.05557
2150	0.05739
2149.5	0.05616
2149	0.05782
2148.5	0.05717
2148	0.05766
2147.5	0.05286
2147	0.05461
2146.5	0.05199
2146	0.0505
2145.5	0.05066
2145	0.04831
2144.5	0.04842
2144	0.04948
2143.5	0.04848
2143	0.04919
2142.5	0.0539
2142	0.05544
2141.5	0.05336
2141	0.05358
2140.5	0.05303
2140	0.05611
2139.5	0.05536
2139	0.05153
2138.5	0.05385
2138	0.05416
2137.5	0.05736
2137	0.05856
2136.5	0.05866
2136	0.05911
2135.5	0.05807
2135	0.05996
2134.5	0.06179
2134	0.06101
2133.5	0.06095
2133	0.06323
2132.5	0.06339
2132	0.05945
2131.5	0.06223
2131	0.05917
2130.5	0.06038
2130	0.06058
2129.5	0.05831
2129	0.06251
2128.5	0.06249
2128	0.06388
2127.5	0.06484
2127	0.06593
2126.5	0.06961
2126	0.06866
2125.5	0.0712
2125	0.07045
2124.5	0.07256
2124	0.07404
2123.5	0.07334
2123	0.0741
2122.5	0.07531
2122	0.07887
2121.5	0.07898
2121	0.0793
2120.5	0.0807
2120	0.07978
2119.5	0.08189
2119	0.08647
2118.5	0.09151
2118	0.09029
2117.5	0.095
2117	0.09865
2116.5	0.09512
2116	0.09662
2115.5	0.09891
2115	0.09938
2114.5	0.10161
2114	0.10387
2113.5	0.10724
2113	0.10871
2112.5	0.10605
2112	0.10349
2111.5	0.10251
2111	0.10358
2110.5	0.10839
2110	0.10947
2109.5	0.10977
2109	0.11269
2108.5	0.11308
2108	0.11669
2107.5	0.11681
2107	0.11678
2106.5	0.11714
2106	0.1161
2105.5	0.12281
2105	0.12105
2104.5	0.12536
2104	0.1232
2103.5	0.12764
2103	0.12728
2102.5	0.12617
2102	0.12979
2101.5	0.13054
2101	0.12973
2100.5	0.13444
2100	0.1389
2099.5	0.14277
2099	0.14369
2098.5	0.14751
2098	0.1493
2097.5	0.14969
2097	0.15366
2096.5	0.15424
2096	0.15771
2095.5	0.16165
2095	0.16312
2094.5	0.16369
2094	0.16479
2093.5	0.16413
2093	0.16795
2092.5	0.17207
2092	0.17376
2091.5	0.17706
2091	0.18257
2090.5	0.18589
2090	0.19135
2089.5	0.19553
2089	0.19813
2088.5	0.20067
2088	0.20605
2087.5	0.20699
2087	0.21256
2086.5	0.22013
2086	0.22458
2085.5	0.23132
2085	0.23114
2084.5	0.23024
2084	0.23332
2083.5	0.23464
2083	0.23551
2082.5	0.24193
2082	0.24443
2081.5	0.24927
2081	0.25352
2080.5	0.25718
2080	0.26129
2079.5	0.26637
2079	0.2738
2078.5	0.27607
2078	0.28001
2077.5	0.28224
2077	0.29078
2076.5	0.29322
2076	0.29378
2075.5	0.29319
2075	0.29491
2074.5	0.29626
2074	0.29589
2073.5	0.29529
2073	0.29378
2072.5	0.29025
2072	0.29445
2071.5	0.29872
2071	0.30064
2070.5	0.30014
2070	0.30423
2069.5	0.30635
2069	0.31271
2068.5	0.32074
2068	0.32059
2067.5	0.31913
2067	0.31856
2066.5	0.32585
2066	0.3289
2065.5	0.32955
2065	0.32878
2064.5	0.33066
2064	0.33742
2063.5	0.33017
2063	0.33044
2062.5	0.33202
2062	0.3316
2061.5	0.33145
2061	0.33321
2060.5	0.33271
2060	0.33059
2059.5	0.32426
2059	0.32478
2058.5	0.32281
2058	0.31908
2057.5	0.31468
2057	0.31184
2056.5	0.30394
2056	0.30152
2055.5	0.29697
2055	0.29225
2054.5	0.28741
2054	0.28281
2053.5	0.2744
2053	0.27192
2052.5	0.26955
2052	0.26311
2051.5	0.25722
2051	0.25046
2050.5	0.25146
2050	0.25218
2049.5	0.24279
2049	0.23857
2048.5	0.23606
2048	0.23129
2047.5	0.2309
2047	0.22767
2046.5	0.22209
2046	0.21669
2045.5	0.21512
2045	0.21224
2044.5	0.21227
2044	0.21206
2043.5	0.20665
2043	0.20756
2042.5	0.21025
2042	0.20697
2041.5	0.20957
2041	0.2063
2040.5	0.20619
2040	0.20564
2039.5	0.20657
2039	0.20097
2038.5	0.19842
2038	0.19728
2037.5	0.1933
2037	0.19102
2036.5	0.18858
2036	0.18467
2035.5	0.18287
2035	0.18041
2034.5	0.18184
2034	0.18246
2033.5	0.18008
2033	0.17959
2032.5	0.18061
2032	0.18092
2031.5	0.17766
2031	0.1767
2030.5	0.17779
2030	0.17627
2029.5	0.17676
2029	0.17654
2028.5	0.17628
2028	0.17679
2027.5	0.17165
2027	0.17652
2026.5	0.17719
2026	0.17734
2025.5	0.1791
2025	0.17905
2024.5	0.17717
2024	0.17812
2023.5	0.17804
2023	0.17744
2022.5	0.17818
2022	0.17411
2021.5	0.17384
2021	0.17372
2020.5	0.16972
2020	0.17102
2019.5	0.16775
2019	0.16831
2018.5	0.1727
2018	0.17255
2017.5	0.17466
2017	0.17414
2016.5	0.16984
2016	0.16709
2015.5	0.16662
2015	0.16712
2014.5	0.16586
2014	0.16779
2013.5	0.16642
2013	0.16989
2012.5	0.16768
2012	0.16509
2011.5	0.16711
2011	0.16796
2010.5	0.16886
2010	0.17084
2009.5	0.1744
2009	0.17448
2008.5	0.17502
2008	0.1739
2007.5	0.17008
2007	0.16792
2006.5	0.16659
2006	0.16961
2005.5	0.17055
2005	0.16679
2004.5	0.16401
2004	0.16551
2003.5	0.16676
2003	0.16669
2002.5	0.16403
2002	0.16448
2001.5	0.16779
2001	0.17146
2000.5	0.17199
2000	0.17133
1999.5	0.16789
1999	0.16916
1998.5	0.17292
1998	0.17204
1997.5	0.1715
1997	0.17308
1996.5	0.17502
1996	0.17602
1995.5	0.17561
1995	0.1717
1994.5	0.1691
1994	0.17079
1993.5	0.1691
1993	0.17167
1992.5	0.16677
1992	0.16436
1991.5	0.16319
1991	0.16225
1990.5	0.16071
1990	0.16164
1989.5	0.15957
1989	0.15983
1988.5	0.16208
1988	0.16251
1987.5	0.15885
1987	0.15712
1986.5	0.15545
1986	0.15126
1985.5	0.15271
1985	0.14689
1984.5	0.14308
1984	0.14158
1983.5	0.13941
1983	0.13711
1982.5	0.13822
1982	0.13327
1981.5	0.13289
1981	0.13342
1980.5	0.13473
1980	0.13287
1979.5	0.13381
1979	0.13481
1978.5	0.13666
1978	0.14039
1977.5	0.141
1977	0.13946
1976.5	0.13863
1976	0.13529
1975.5	0.13327
1975	0.13196
1974.5	0.1337
1974	0.13054
1973.5	0.13106
1973	0.13296
1972.5	0.13041
1972	0.12769
1971.5	0.12673
1971	0.12411
1970.5	0.12318
1970	0.12246
1969.5	0.12389
1969	0.12822
1968.5	0.12535
1968	0.12413
1967.5	0.12778
1967	0.12627
1966.5	0.12123
1966	0.12442
1965.5	0.12168
1965	0.121
1964.5	0.12296
1964	0.12077
1963.5	0.1222
1963	0.11989
1962.5	0.12289
1962	0.12769
1961.5	0.12629
1961	0.12359
1960.5	0.1267
1960	0.13169
1959.5	0.13023
1959	0.12855
1958.5	0.13205
1958	0.13208
1957.5	0.13238
1957	0.13422
1956.5	0.13427
1956	0.13123
1955.5	0.13025
1955	0.12931
1954.5	0.12851
1954	0.12837
1953.5	0.12242
1953	0.12491
1952.5	0.12774
1952	0.12221
1951.5	0.12138
1951	0.12258
1950.5	0.12477
1950	0.12393
1949.5	0.12485
1949	0.12234
1948.5	0.1186
1948	0.11236
1947.5	0.11247
1947	0.11112
1946.5	0.10689
1946	0.10764
1945.5	0.10688
1945	0.10585
1944.5	0.10211
1944	0.09779
1943.5	0.09439
1943	0.09758
1942.5	0.09637
1942	0.10147
1941.5	0.10647
1941	0.10964
1940.5	0.1103
1940	0.11066
1939.5	0.11205
1939	0.11335
1938.5	0.11459
1938	0.1164
1937.5	0.1176
1937	0.11512
1936.5	0.11588
1936	0.11755
1935.5	0.1177
1935	0.1155
1934.5	0.11831
1934	0.11588
1933.5	0.11535
1933	0.11136
1932.5	0.10979
1932	0.10463
1931.5	0.10479
1931	0.10336
1930.5	0.10572
1930	0.10418
1929.5	0.10459
1929	0.10425
1928.5	0.10261
1928	0.10129
1927.5	0.10045
1927	0.10259
1926.5	0.1085
1926	0.11115
1925.5	0.11401
1925	0.117
1924.5	0.11615
1924	0.11551
1923.5	0.11434
1923	0.11399
1922.5	0.11267
1922	0.11082
1921.5	0.11119
1921	0.11097
1920.5	0.1103
1920	0.10629
1919.5	0.10582
1919	0.10348
1918.5	0.10289
1918	0.10415
1917.5	0.1043
1917	0.10271
1916.5	0.10198
1916	0.10193
1915.5	0.10282
1915	0.10465
1914.5	0.10297
1914	0.10328
1913.5	0.10465
1913	0.10212
1912.5	0.09782
1912	0.09778
1911.5	0.09323
1911	0.09423
1910.5	0.0959
1910	0.09573
1909.5	0.09531
1909	0.09649
1908.5	0.0954
1908	0.09529
1907.5	0.09657
1907	0.09573
1906.5	0.09543
1906	0.09928
1905.5	0.0947
1905	0.09745
1904.5	0.09563
1904	0.09596
1903.5	0.09385
1903	0.09247
1902.5	0.09129
1902	0.09253
1901.5	0.09196
1901	0.08866
1900.5	0.08714
1900	0.0895
1899.5	0.08804
1899	0.08743
1898.5	0.08696
1898	0.08494
1897.5	0.0844
1897	0.08357
1896.5	0.08329
1896	0.08512
1895.5	0.0864
1895	0.08539
1894.5	0.08204
1894	0.08099
1893.5	0.08234
1893	0.08372
1892.5	0.08374
1892	0.08348
1891.5	0.0833
1891	0.08193
1890.5	0.07975
1890	0.0786
1889.5	0.07594
1889	0.07468
1888.5	0.07267
1888	0.07448
1887.5	0.07174
1887	0.07133
1886.5	0.07014
1886	0.06745
1885.5	0.06762
1885	0.06587
1884.5	0.06527
1884	0.06574
1883.5	0.06645
1883	0.06691
1882.5	0.06524
1882	0.06549
1881.5	0.06381
1881	0.06414
1880.5	0.0624
1880	0.06061
1879.5	0.06062
1879	0.06146
1878.5	0.06097
1878	0.05995
1877.5	0.05958
1877	0.05807
1876.5	0.05874
1876	0.05701
1875.5	0.05643
1875	0.05611
1874.5	0.05637
1874	0.05719
1873.5	0.05918
1873	0.05724
1872.5	0.05564
1872	0.05598
1871.5	0.05585
1871	0.05419
1870.5	0.05254
1870	0.05176
1869.5	0.05299
1869	0.05249
1868.5	0.05041
1868	0.04942
1867.5	0.04795
1867	0.04571
1866.5	0.04588
1866	0.04629
1865.5	0.04532
1865	0.04506
1864.5	0.04491
1864	0.04579
1863.5	0.04625
1863	0.04465
1862.5	0.04544
1862	0.04557
1861.5	0.04617
1861	0.04638
1860.5	0.04666
1860	0.04643
1859.5	0.04568
1859	0.04696
1858.5	0.04662
1858	0.04699
1857.5	0.04732
1857	0.04686
1856.5	0.04751
1856	0.04594
1855.5	0.04616
1855	0.04633
1854.5	0.04647
1854	0.04714
1853.5	0.04675
1853	0.04737
1852.5	0.04632
1852	0.04574
1851.5	0.04637
1851	0.04552
1850.5	0.04542
1850	0.04701
1849.5	0.0472
1849	0.04727
1848.5	0.04789
1848	0.0472
1847.5	0.0465
1847	0.04728
1846.5	0.04729
1846	0.04699
1845.5	0.04899
1845	0.04848
1844.5	0.04876
1844	0.04854
1843.5	0.04876
1843	0.04848
1842.5	0.04914
1842	0.0489
1841.5	0.04886
1841	0.04845
1840.5	0.04763
1840	0.04732
1839.5	0.04758
1839	0.0456
1838.5	0.0459
1838	0.04528
1837.5	0.0452
1837	0.04419
1836.5	0.04253
1836	0.04183
1835.5	0.04105
1835	0.03984
1834.5	0.03967
1834	0.03976
1833.5	0.03874
1833	0.0372
1832.5	0.03649
1832	0.03535
1831.5	0.03569
1831	0.03412
1830.5	0.03348
1830	0.0328
1829.5	0.03123
1829	0.03035
1828.5	0.03091
1828	0.03011
1827.5	0.02997
1827	0.03093
1826.5	0.0305
1826	0.03065
1825.5	0.02982
1825	0.02925
1824.5	0.02861
1824	0.02802
1823.5	0.02873
1823	0.029
1822.5	0.02816
1822	0.02662
1821.5	0.02559
1821	0.0253
1820.5	0.02379
1820	0.02338
1819.5	0.02298
1819	0.02194
1818.5	0.02203
1818	0.02256
1817.5	0.02171
1817	0.02234
1816.5	0.02239
1816	0.02271
1815.5	0.02271
1815	0.02234
1814.5	0.02162
1814	0.0208
1813.5	0.02113
1813	0.02202
1812.5	0.02269
1812	0.02251
1811.5	0.02254
1811	0.0219
1810.5	0.02171
1810	0.0211
1809.5	0.02143
1809	0.02116
1808.5	0.02201
1808	0.02196
1807.5	0.02275
1807	0.02238
1806.5	0.02162
1806	0.02111
1805.5	0.0217
1805	0.02026
1804.5	0.02047
1804	0.01925
1803.5	0.01936
1803	0.01971
1802.5	0.01953
1802	0.02016
1801.5	0.01959
1801	0.01946
1800.5	0.01918
1800	0.02011
1799.5	0.02005
1799	0.01988
1798.5	0.02128
1798	0.02204
1797.5	0.02309
1797	0.02329
1796.5	0.02365
1796	0.02494
1795.5	0.02535
1795	0.02625
1794.5	0.02705
1794	0.02756
1793.5	0.02798
1793	0.02771
1792.5	0.02815
1792	0.02798
1791.5	0.02801
1791	0.02872
1790.5	0.02927
1790	0.02968
1789.5	0.02892
1789	0.02838
1788.5	0.02913
1788	0.02851
1787.5	0.02916
1787	0.02886
1786.5	0.02941
1786	0.02937
1785.5	0.02917
1785	0.02915
1784.5	0.02833
1784	0.02757
1783.5	0.02733
1783	0.02723
1782.5	0.02577
1782	0.02448
1781.5	0.02393
1781	0.02305
1780.5	0.02233
1780	0.02099
1779.5	0.01978
1779	0.01967
1778.5	0.0188
1778	0.01816
1777.5	0.0171
1777	0.01649
1776.5	0.01573
1776	0.01607
1775.5	0.01588
1775	0.01514
1774.5	0.01499
1774	0.01428
1773.5	0.01398
1773	0.01403
1772.5	0.01305
1772	0.01266
1771.5	0.0124
1771	0.01284
1770.5	0.01225
1770	0.01227
1769.5	0.01215
1769	0.01256
1768.5	0.01276
1768	0.0123
1767.5	0.01135
1767	0.0121
1766.5	0.01223
1766	0.01184
1765.5	0.01245
1765	0.01258
1764.5	0.01228
1764	0.01239
1763.5	0.0127
1763	0.01268
1762.5	0.01191
1762	0.01157
1761.5	0.0117
1761	0.01203
1760.5	0.01189
1760	0.01248
1759.5	0.01207
1759	0.01159
1758.5	0.01162
1758	0.01069
1757.5	0.01039
1757	0.00972
1756.5	0.00951
1756	0.00932
1755.5	0.00986
1755	0.00978
1754.5	0.00942
1754	0.0092
1753.5	0.00872
1753	0.00926
1752.5	0.00909
1752	0.00872
1751.5	0.00892
1751	0.00941
1750.5	0.00994
1750	0.00942
1749.5	0.00954
1749	0.0094
1748.5	0.00933
1748	0.0095
1747.5	0.00949
1747	0.00909
1746.5	0.00904
1746	0.00871
1745.5	0.00928
1745	0.00893
1744.5	0.00877
1744	0.00858
1743.5	0.00846
1743	0.00845
1742.5	0.0079
1742	0.00796
1741.5	0.00731
1741	0.0071
1740.5	0.00708
1740	0.00683
1739.5	0.00708
1739	0.00672
1738.5	0.00674
1738	0.00702
1737.5	0.0072
1737	0.00686
1736.5	0.00631
1736	0.00631
1735.5	0.00597
1735	0.00585
1734.5	0.00644
1734	0.00639
1733.5	0.00606
1733	0.00621
1732.5	0.0059
1732	0.00588
1731.5	0.00547
1731	0.00535
1730.5	0.00557
1730	0.00564
1729.5	0.0057
1729	0.00546
1728.5	0.00519
1728	0.00555
1727.5	0.00533
1727	0.00478
1726.5	0.00435
1726	0.00459
1725.5	0.00424
1725	0.00455
1724.5	0.00452
1724	0.00431
1723.5	0.00445
1723	0.00436
1722.5	0.0041
1722	0.00437
1721.5	0.00439
1721	0.00418
1720.5	0.00428
1720	0.00454
1719.5	0.00462
1719	0.00472
1718.5	0.00457
1718	0.00404
1717.5	0.00402
1717	0.00426
1716.5	0.00395
1716	0.00444
1715.5	0.00398
1715	0.0036
1714.5	0.00375
1714	0.0035
1713.5	0.00376
1713	0.00386
1712.5	0.00398
1712	0.00363
1711.5	0.00419
1711	0.00387
1710.5	0.0038
1710	0.00411
1709.5	0.00444
1709	0.00444
1708.5	0.00402
1708	0.00427
1707.5	0.00417
1707	0.00381
1706.5	0.00362
1706	0.00295
1705.5	0.00295
1705	0.00338
1704.5	0.00385
1704	0.0044
1703.5	0.00424
1703	0.0039
1702.5	0.00403
1702	0.00474
1701.5	0.00479
1701	0.00529
1700.5	0.00512
1700	0.00553
1699.5	0.00564
1699	0.00544
1698.5	0.00613
1698	0.0057
1697.5	0.00584
1697	0.0062
1696.5	0.00605
1696	0.00654
1695.5	0.00587
1695	0.0057
1694.5	0.00573
1694	0.00572
1693.5	0.00571
1693	0.00598
1692.5	0.00574
1692	0.00513
1691.5	0.00476
1691	0.00361
1690.5	0.00348
1690	0.00315
1689.5	0.00252
1689	0.00275
1688.5	0.00335
1688	0.00312
1687.5	0.00353
1687	0.00389
1686.5	0.00322
1686	0.00334
1685.5	0.00309
1685	0.00283
1684.5	0.00409
1684	0.00386
1683.5	0.00394
1683	0.00398
1682.5	0.0037
1682	0.00345
1681.5	0.00363
1681	0.00349
1680.5	0.0031
1680	0.00353
1679.5	0.0037
1679	0.00353
1678.5	0.00449
1678	0.00378
1677.5	0.00481
1677	0.00511
1676.5	0.00466
1676	0.00447
1675.5	0.00455
1675	0.00476
1674.5	0.00393
1674	0.00465
1673.5	0.00476
1673	0.0045
1672.5	0.00457
1672	0.00408
1671.5	0.0048
1671	0.00413
1670.5	0.00432
1670	0.00508
1669.5	0.00466
1669	0.00462
1668.5	0.00414
1668	0.00491
1667.5	0.0051
1667	0.00529
1666.5	0.00512
1666	0.00531
1665.5	0.00525
1665	0.00525
1664.5	0.00529
1664	0.00479
1663.5	0.0046
1663	0.00525
1662.5	0.00529
1662	0.00583
1661.5	0.00557
1661	0.00524
1660.5	0.00478
1660	0.00499
1659.5	0.00497
1659	0.00503
1658.5	0.0052
1658	0.00493
1657.5	0.0048
1657	0.00522
1656.5	0.00515
1656	0.00498
1655.5	0.00506
1655	0.00493
1654.5	0.00542
1654	0.00576
1653.5	0.00554
1653	0.00502
1652.5	0.00516
1652	0.00537
1651.5	0.00571
1651	0.00551
1650.5	0.00585
1650	0.00544
1649.5	0.0056
1649	0.00545
1648.5	0.00592
1648	0.00538
1647.5	0.00606
1647	0.00629
1646.5	0.00636
1646	0.00632
1645.5	0.00585
1645	0.00607
1644.5	0.00651
1644	0.00632
1643.5	0.0063
1643	0.00626
1642.5	0.00653
1642	0.00686
1641.5	0.00742
1641	0.00744
1640.5	0.00689
1640	0.00694
1639.5	0.00682
1639	0.00666
1638.5	0.00601
1638	0.00621
1637.5	0.00586
1637	0.00634
1636.5	0.00673
1636	0.0063
1635.5	0.00558
1635	0.00502
1634.5	0.00458
1634	0.00478
1633.5	0.00517
1633	0.00549
1632.5	0.00562
1632	0.00616
1631.5	0.0061
1631	0.00621
1630.5	0.0062
1630	0.00605
1629.5	0.00569
1629	0.00655
1628.5	0.00702
1628	0.00722
1627.5	0.00717
1627	0.0066
1626.5	0.0066
1626	0.00643
1625.5	0.00593
1625	0.00666
1624.5	0.00676
1624	0.0069
1623.5	0.00674
1623	0.00683
1622.5	0.00662
1622	0.00662
1621.5	0.0072
1621	0.00663
1620.5	0.00708
1620	0.00704
1619.5	0.00731
1619	0.00725
1618.5	0.0073
1618	0.00673
1617.5	0.00628
1617	0.00649
1616.5	0.00673
1616	0.00611
1615.5	0.00615
1615	0.00637
1614.5	0.00693
1614	0.00599
1613.5	0.00598
1613	0.0064
1612.5	0.00716
1612	0.00696
1611.5	0.00685
1611	0.00657
1610.5	0.00658
1610	0.00623
1609.5	0.00579
1609	0.00601
1608.5	0.00587
1608	0.00563
1607.5	0.00564
1607	0.0055
1606.5	0.00465
1606	0.00426
1605.5	0.00428
1605	0.00448
1604.5	0.00463
1604	0.00485
1603.5	0.00526
1603	0.00593
1602.5	0.00608
1602	0.00609
1601.5	0.006
1601	0.00613
1600.5	0.00548
1600	0.00613
1599.5	0.00613
1599	0.00643
1598.5	0.00637
1598	0.00649
1597.5	0.00636
1597	0.00648
1596.5	0.0061
1596	0.00625
1595.5	0.00607
1595	0.00577
1594.5	0.00648
1594	0.00686
1593.5	0.00645
1593	0.00647
1592.5	0.00652
1592	0.0067
1591.5	0.00635
1591	0.00673
1590.5	0.00666
1590	0.00689
1589.5	0.00648
1589	0.00667
1588.5	0.00654
1588	0.00637
1587.5	0.00623
1587	0.00589
1586.5	0.00634
1586	0.00604
1585.5	0.0059
1585	0.00581
1584.5	0.00508
1584	0.00516
1583.5	0.00519
1583	0.00581
1582.5	0.00553
1582	0.00579
1581.5	0.0059
1581	0.00592
1580.5	0.00629
1580	0.0062
1579.5	0.00621
1579	0.00643
1578.5	0.00704
1578	0.0072
1577.5	0.00796
1577	0.00793
1576.5	0.00799
1576	0.00818
1575.5	0.00822
1575	0.00857
1574.5	0.00848
1574	0.0077
1573.5	0.00752
1573	0.00769
1572.5	0.00733
1572	0.0072
1571.5	0.00663
1571	0.00627
1570.5	0.00673
1570	0.00639
1569.5	0.00642
1569	0.00599
1568.5	0.00583
1568	0.00634
1567.5	0.00676
1567	0.0068
1566.5	0.00663
1566	0.00676
1565.5	0.00635
1565	0.00692
1564.5	0.00726
1564	0.00699
1563.5	0.00768
1563	0.00748
1562.5	0.00732
1562	0.00709
1561.5	0.0068
1561	0.00657
1560.5	0.00657
1560	0.00635
1559.5	0.0067
1559	0.00713
1558.5	0.00699
1558	0.00711
1557.5	0.00717
1557	0.00661
1556.5	0.007
1556	0.00695
1555.5	0.00741
1555	0.00722
1554.5	0.00719
1554	0.0079
1553.5	0.00804
1553	0.00807
1552.5	0.0079
1552	0.00802
1551.5	0.00775
1551	0.00833
1550.5	0.00862
1550	0.00874
1549.5	0.00889
1549	0.00904
1548.5	0.00935
1548	0.00945
1547.5	0.00914
1547	0.00931
1546.5	0.00956
1546	0.00966
1545.5	0.00946
1545	0.00966
1544.5	0.00945
1544	0.00977
1543.5	0.00999
1543	0.01006
1542.5	0.0097
1542	0.00943
1541.5	0.00952
1541	0.0098
1540.5	0.00926
1540	0.00929
1539.5	0.00937
1539	0.00959
1538.5	0.00904
1538	0.00934
1537.5	0.00902
1537	0.00903
1536.5	0.00925
1536	0.0094
1535.5	0.00977
1535	0.01017
1534.5	0.01
1534	0.01027
1533.5	0.01004
1533	0.01014
1532.5	0.01027
1532	0.01057
1531.5	0.01047
1531	0.01094
1530.5	0.01087
1530	0.01081
1529.5	0.01122
1529	0.01103
1528.5	0.01097
1528	0.01093
1527.5	0.01142
1527	0.01128
1526.5	0.01125
1526	0.01119
1525.5	0.01143
1525	0.01099
1524.5	0.01058
1524	0.01064
1523.5	0.01092
1523	0.01073
1522.5	0.01111
1522	0.01101
1521.5	0.01106
1521	0.01108
1520.5	0.01128
1520	0.01145
1519.5	0.0113
1519	0.01118
1518.5	0.01148
1518	0.01175
1517.5	0.01237
1517	0.01223
1516.5	0.01229
1516	0.0121
1515.5	0.01229
1515	0.01252
1514.5	0.01252
1514	0.013
1513.5	0.01306
1513	0.01343
1512.5	0.01404
1512	0.01375
1511.5	0.01405
1511	0.01348
1510.5	0.01351
1510	0.01386
1509.5	0.01352
1509	0.01411
1508.5	0.01418
1508	0.01397
1507.5	0.01369
1507	0.01307
1506.5	0.01312
1506	0.01338
1505.5	0.01354
1505	0.01337
1504.5	0.01403
1504	0.01416
1503.5	0.01451
1503	0.01489
1502.5	0.01442
1502	0.01457
1501.5	0.01499
1501	0.01535
1500.5	0.01586
[truncated: 2,601 more rows]

## Sheet: GdF3
2500	0.4936		GdF3
2499.5	0.28996
2499	0.34998
2498.5	0.34715
2498	0.37357
2497.5	0.41687
2497	0.45037
2496.5	0.54268
2496	0.57931
2495.5	0.47699
2495	0.37953
2494.5	0.46599
2494	0.47939
2493.5	0.53521
2493	0.45818
2492.5	0.48641
2492	0.50582
2491.5	0.54375
2491	0.61691
2490.5	0.62062
2490	0.50313
2489.5	0.47745
2489	0.57368
2488.5	0.52513
2488	0.39781
2487.5	0.41427
2487	0.48466
2486.5	0.65412
2486	0.60338
2485.5	0.57699
2485	0.4057
2484.5	0.48878
2484	0.40094
2483.5	0.33347
2483	0.34088
2482.5	0.37471
2482	0.4027
2481.5	0.41989
2481	0.43986
2480.5	0.49381
2480	0.57577
2479.5	0.46118
2479	0.53553
2478.5	0.47443
2478	0.382
2477.5	0.3988
2477	0.35855
2476.5	0.41255
2476	0.50374
2475.5	0.45998
2475	0.48651
2474.5	0.36017
2474	0.35196
2473.5	0.44125
2473	0.38164
2472.5	0.38209
2472	0.4081
2471.5	0.4441
2471	0.36737
2470.5	0.27476
2470	0.38673
2469.5	0.37296
2469	0.50056
2468.5	0.35875
2468	0.32081
2467.5	0.30012
2467	0.32743
2466.5	0.34226
2466	0.40715
2465.5	0.47871
2465	0.51748
2464.5	0.51095
2464	0.40593
2463.5	0.35239
2463	0.32379
2462.5	0.45895
2462	0.44184
2461.5	0.55103
2461	0.54834
2460.5	0.46529
2460	0.3875
2459.5	0.42272
2459	0.50445
2458.5	0.47889
2458	0.41158
2457.5	0.32979
2457	0.3618
2456.5	0.48023
2456	0.47977
2455.5	0.39058
2455	0.24429
2454.5	0.22773
2454	0.17429
2453.5	0.21526
2453	0.23208
2452.5	0.33146
2452	0.3488
2451.5	0.3045
2451	0.33584
2450.5	0.46141
2450	0.49136
2449.5	0.48175
2449	0.4631
2448.5	0.40293
2448	0.34658
2447.5	0.22745
2447	0.17106
2446.5	0.22427
2446	0.22878
2445.5	0.21033
2445	0.25653
2444.5	0.29442
2444	0.41752
2443.5	0.34
2443	0.38847
2442.5	0.3652
2442	0.37736
2441.5	0.42121
2441	0.39103
2440.5	0.3652
2440	0.35674
2439.5	0.26963
2439	0.29361
2438.5	0.2789
2438	0.27879
2437.5	0.32003
2437	0.22589
2436.5	0.25695
2436	0.38359
2435.5	0.44414
2435	0.49612
2434.5	0.36502
2434	0.38205
2433.5	0.32225
2433	0.31176
2432.5	0.24307
2432	0.31336
2431.5	0.37386
2431	0.36552
2430.5	0.33938
2430	0.313
2429.5	0.26829
2429	0.25896
2428.5	0.25713
2428	0.2701
2427.5	0.26052
2427	0.25723
2426.5	0.26672
2426	0.30314
2425.5	0.38062
2425	0.43071
2424.5	0.41232
2424	0.32914
2423.5	0.34974
2423	0.38263
2422.5	0.35945
2422	0.31655
2421.5	0.30743
2421	0.25444
2420.5	0.28781
2420	0.3856
2419.5	0.44725
2419	0.54112
2418.5	0.50343
2418	0.41894
2417.5	0.31603
2417	0.27455
2416.5	0.27766
2416	0.28477
2415.5	0.25626
2415	0.25478
2414.5	0.30491
2414	0.3823
2413.5	0.4131
2413	0.39386
2412.5	0.40129
2412	0.29321
2411.5	0.27028
2411	0.29399
2410.5	0.36667
2410	0.32384
2409.5	0.33449
2409	0.24974
2408.5	0.30174
2408	0.2382
2407.5	0.28362
2407	0.32152
2406.5	0.37769
2406	0.35146
2405.5	0.27099
2405	0.24612
2404.5	0.27571
2404	0.34172
2403.5	0.38024
2403	0.39824
2402.5	0.40949
2402	0.35744
2401.5	0.40588
2401	0.33197
2400.5	0.35039
2400	0.27531
2399.5	0.33743
2399	0.37942
2398.5	0.336
2398	0.36489
2397.5	0.29138
2397	0.32067
2396.5	0.32419
2396	0.30188
2395.5	0.29773
2395	0.20801
2394.5	0.24823
2394	0.19887
2393.5	0.26372
2393	0.27256
2392.5	0.28768
2392	0.23846
2391.5	0.20632
2391	0.21421
2390.5	0.22448
2390	0.23411
2389.5	0.21244
2389	0.23061
2388.5	0.21713
2388	0.25062
2387.5	0.2175
2387	0.38669
2386.5	0.40509
2386	0.36122
2385.5	0.38029
2385	0.41406
2384.5	0.35799
2384	0.46528
2383.5	0.4622
2383	0.36399
2382.5	0.40928
2382	0.33299
2381.5	0.23532
2381	0.37967
2380.5	0.39565
2380	0.4084
2379.5	0.40616
2379	0.38498
2378.5	0.3638
2378	0.38705
2377.5	0.42514
2377	0.03026
2376.5	0.03252
2376	-0.12598
2375.5	0.1091
2375	0.38545
2374.5	0.38793
2374	0.22544
2373.5	0.0703
2373	0.18279
2372.5	0.18636
2372	0.37012
2371.5	0.20097
2371	0.2951
2370.5	0.36818
2370	0.36243
2369.5	0.49487
2369	0.44027
2368.5	0.43911
2368	0.41448
2367.5	0.41628
2367	0.28562
2366.5	0.29236
2366	0.18884
2365.5	0.25967
2365	0.20359
2364.5	0.13865
2364	0.19115
2363.5	0.1588
2363	0.08475
2362.5	0.20038
2362	0.13936
2361.5	-0.00353
2361	-0.04945
2360.5	0.11751
2360	0.1649
2359.5	0.16514
2359	0.15166
2358.5	0.13856
2358	0.15788
2357.5	0.17142
2357	0.11743
2356.5	0.20985
2356	0.1313
2355.5	0.07783
2355	-0.09688
2354.5	-0.07273
2354	0.17869
2353.5	0.18923
2353	0.25964
2352.5	0.24049
2352	0.29904
2351.5	0.22451
2351	0.2262
2350.5	0.28406
2350	0.30092
2349.5	0.18459
2349	0.09816
2348.5	0.29425
2348	0.29732
2347.5	0.42885
2347	0.40733
2346.5	0.29308
2346	0.2512
2345.5	0.15246
2345	0.18627
2344.5	0.06057
2344	0.1986
2343.5	0.24218
2343	0.30636
2342.5	0.08368
2342	0.02656
2341.5	0.1144
2341	0.16371
2340.5	0.41837
2340	0.3725
2339.5	0.31002
2339	0.1299
2338.5	0.14418
2338	0.14911
2337.5	0.15759
2337	0.08811
2336.5	0.19954
2336	0.26414
2335.5	0.3782
2335	0.46479
2334.5	0.27885
2334	0.19939
2333.5	0.04835
2333	0.10969
2332.5	0.08068
2332	0.06884
2331.5	0.06678
2331	-0.02426
2330.5	0.04571
2330	0.10659
2329.5	0.07731
2329	0.16314
2328.5	0.22654
2328	0.21691
2327.5	0.26312
2327	0.25092
2326.5	0.19858
2326	0.19431
2325.5	0.18019
2325	0.13651
2324.5	0.31182
2324	0.29101
2323.5	0.37204
2323	0.16822
2322.5	0.16104
2322	0.04161
2321.5	-0.09615
2321	0.00356
2320.5	-0.02381
2320	0.08191
2319.5	0.16611
2319	0.33883
2318.5	0.34533
2318	0.29026
2317.5	0.20361
2317	0.15543
2316.5	0.13874
2316	0.00366
2315.5	0.06093
2315	0.01007
2314.5	0.09321
2314	0.01447
2313.5	0.000108206
2313	0.11353
2312.5	0.04692
2312	0.12533
2311.5	-0.03871
2311	-0.07637
2310.5	-0.08129
2310	-0.08733
2309.5	-0.05662
2309	0.03269
2308.5	0.00298
2308	-0.00292
2307.5	0.07402
2307	0.20381
2306.5	0.29857
2306	0.31079
2305.5	0.24811
2305	0.1038
2304.5	0.13646
2304	-0.01256
2303.5	0.03729
2303	0.04776
2302.5	0.09094
2302	0.18879
2301.5	0.17322
2301	0.02153
2300.5	-0.0628
2300	-0.00991
2299.5	0.10919
2299	0.0831
2298.5	0.11241
2298	0.04173
2297.5	0.07869
2297	0.17153
2296.5	0.24881
2296	0.13532
2295.5	0.1199
2295	-0.02923
2294.5	0.04426
2294	0.0192
2293.5	0.01647
2293	0.2453
2292.5	0.26049
2292	0.32147
2291.5	0.14034
2291	0.09822
2290.5	0.17912
2290	0.28625
2289.5	0.23083
2289	0.1711
2288.5	-0.06533
2288	0.01935
2287.5	0.04251
2287	0.15465
2286.5	0.11288
2286	0.01052
2285.5	-0.07728
2285	-0.00459
2284.5	0.00299
2284	0.0689
2283.5	0.14947
2283	0.3033
2282.5	0.26807
2282	0.3219
2281.5	0.279
2281	0.2244
2280.5	0.20979
2280	0.26599
2279.5	0.23107
2279	0.16597
2278.5	0.04314
2278	0.08509
2277.5	0.2127
2277	0.21277
2276.5	0.18559
2276	0.2011
2275.5	0.31593
2275	0.24292
2274.5	0.30874
2274	0.26462
2273.5	0.27145
2273	0.30271
2272.5	0.28057
2272	0.25672
2271.5	0.20637
2271	0.2007
2270.5	0.05651
2270	0.04468
2269.5	0.07749
2269	0.14977
2268.5	0.16431
2268	0.18422
2267.5	0.17462
2267	0.10483
2266.5	0.02899
2266	0.0421
2265.5	-0.00075726
2265	0.06556
2264.5	0.10375
2264	0.06467
2263.5	0.06082
2263	0.08257
2262.5	-0.01138
2262	-0.04816
2261.5	0.0103
2261	0.14453
2260.5	0.20208
2260	0.20823
2259.5	0.20814
2259	0.15689
2258.5	0.2234
2258	0.22356
2257.5	0.17976
2257	0.18191
2256.5	0.08658
2256	0.15501
2255.5	0.09902
2255	0.08004
2254.5	-0.0119
2254	-0.03022
2253.5	0.00303
2253	0.09729
2252.5	0.2386
2252	0.26208
2251.5	0.10783
2251	-0.02901
2250.5	0.03788
2250	0.08716
2249.5	0.16974
2249	0.07953
2248.5	0.06895
2248	0.05715
2247.5	0.09697
2247	0.10425
2246.5	0.16207
2246	0.18873
2245.5	0.14933
2245	0.1928
2244.5	0.14825
2244	0.25738
2243.5	0.2879
2243	0.33445
2242.5	0.28129
2242	0.27882
2241.5	0.21276
2241	0.15598
2240.5	0.13554
2240	0.20415
2239.5	0.224
2239	0.1339
2238.5	0.03647
2238	0.03854
2237.5	0.08057
2237	0.03425
2236.5	0.09244
2236	0.16254
2235.5	0.21433
2235	0.27398
2234.5	0.28327
2234	0.25186
2233.5	0.2973
2233	0.26093
2232.5	0.36159
2232	0.26573
2231.5	0.30965
2231	0.24662
2230.5	0.37773
2230	0.28878
2229.5	0.33265
2229	0.33391
2228.5	0.33142
2228	0.21816
2227.5	0.2437
2227	0.27249
2226.5	0.3787
2226	0.35933
2225.5	0.27631
2225	0.22745
2224.5	0.24106
2224	0.23315
2223.5	0.20907
2223	0.18444
2222.5	0.17961
2222	0.16009
2221.5	0.18688
2221	0.20948
2220.5	0.2312
2220	0.27108
2219.5	0.29294
2219	0.20074
2218.5	0.14702
2218	0.20969
2217.5	0.26825
2217	0.28025
2216.5	0.31186
2216	0.23918
2215.5	0.26298
2215	0.33458
2214.5	0.48735
2214	0.4983
2213.5	0.43744
2213	0.33773
2212.5	0.23654
2212	0.24986
2211.5	0.23749
2211	0.3284
2210.5	0.32216
2210	0.27562
2209.5	0.24592
2209	0.25636
2208.5	0.24363
2208	0.173
2207.5	0.13473
2207	0.24249
2206.5	0.30044
2206	0.35838
2205.5	0.31069
2205	0.30204
2204.5	0.30045
2204	0.26501
2203.5	0.31606
2203	0.33049
2202.5	0.25416
2202	0.29426
2201.5	0.307
2201	0.30737
2200.5	0.29196
2200	0.27502
2199.5	0.32916
2199	0.2696
2198.5	0.28509
2198	0.33382
2197.5	0.36226
2197	0.31278
2196.5	0.10556
2196	-0.00299
2195.5	0.0224
2195	0.16925
2194.5	0.23944
2194	0.25654
2193.5	0.28856
2193	0.24425
2192.5	0.26215
2192	0.11409
2191.5	0.15175
2191	0.10891
2190.5	0.10782
2190	0.12044
2189.5	0.09489
2189	0.0944
2188.5	0.10106
2188	0.0111
2187.5	0.01216
2187	-0.02644
2186.5	0.02513
2186	0.04533
2185.5	0.09703
2185	0.09783
2184.5	0.06043
2184	0.05163
2183.5	0.01634
2183	0.10493
2182.5	0.09787
2182	0.00584
2181.5	0.0065
2181	0.05857
2180.5	0.03826
2180	0.10939
2179.5	0.10434
2179	0.18028
2178.5	0.21674
2178	0.06528
2177.5	0.03836
2177	-0.04758
2176.5	-0.0509
2176	-0.04682
2175.5	0.07583
2175	0.06543
2174.5	0.08492
2174	0.03433
2173.5	-0.03362
2173	-0.02804
2172.5	0.00755
2172	0.06036
2171.5	0.13615
2171	0.08252
2170.5	0.05074
2170	0.0154
2169.5	0.03458
2169	0.04322
2168.5	0.04374
2168	0.03001
2167.5	0.0439
2167	0.08399
2166.5	-0.0172
2166	-0.06687
2165.5	-0.05191
2165	-0.04912
2164.5	-0.03039
2164	-0.09256
2163.5	-0.05315
2163	-0.02627
2162.5	0.02925
2162	0.04236
2161.5	0.01367
2161	0.02787
2160.5	0.03188
2160	-0.03727
2159.5	-0.09646
2159	-0.01503
2158.5	-0.08368
2158	-0.02312
2157.5	-0.08341
2157	-0.02508
2156.5	-0.04262
2156	0.01122
2155.5	-0.02291
2155	0.0901
2154.5	-0.01106
2154	0.03083
2153.5	-0.01245
2153	0.05005
2152.5	0.01612
2152	-0.02968
2151.5	-0.04728
2151	-0.06403
2150.5	0.01635
2150	0.02719
2149.5	0.04538
2149	0.01362
2148.5	-0.03545
2148	-0.07292
2147.5	-0.03306
2147	-0.07108
2146.5	-0.0223
2146	-0.04533
2145.5	0.01405
2145	-0.03727
2144.5	0.01371
2144	0.04069
2143.5	0.08643
2143	0.01705
2142.5	0.00787
2142	0.01647
2141.5	-0.01461
2141	-0.06058
2140.5	-0.02339
2140	0.01863
2139.5	0.12475
2139	0.07051
2138.5	0.08711
2138	0.11233
2137.5	0.06669
2137	-0.02326
2136.5	-0.03042
2136	-0.01234
2135.5	0.05464
2135	0.04751
2134.5	0.07421
2134	0.07741
2133.5	0.07877
2133	0.15179
2132.5	0.02374
2132	0.0729
2131.5	0.04921
2131	0.15595
2130.5	0.21183
2130	0.16989
2129.5	0.07378
2129	0.05824
2128.5	0.06684
2128	0.08526
2127.5	0.09087
2127	0.10616
2126.5	0.0572
2126	0.08841
2125.5	0.05403
2125	0.03315
2124.5	0.08619
2124	0.06689
2123.5	0.07708
2123	0.07922
2122.5	0.12152
2122	0.13968
2121.5	0.09304
2121	0.12333
2120.5	0.07327
2120	0.06156
2119.5	0.01035
2119	0.01934
2118.5	-0.03767
2118	-0.03647
2117.5	-0.02243
2117	0.04036
2116.5	0.01581
2116	-0.00351
2115.5	0.02556
2115	0.10033
2114.5	0.05743
2114	0.09214
2113.5	0.11548
2113	0.08458
2112.5	0.0794
2112	0.10603
2111.5	0.116
2111	0.07353
2110.5	0.04492
2110	0.09669
2109.5	0.08589
2109	0.11794
2108.5	0.19347
2108	0.2204
2107.5	0.17077
2107	0.11159
2106.5	0.00148
2106	0.08032
2105.5	0.12244
2105	0.21371
2104.5	0.11985
2104	0.12791
2103.5	0.16074
2103	0.13577
2102.5	0.04519
2102	-0.000687201
2101.5	0.0792
2101	0.19061
2100.5	0.2541
2100	0.18855
2099.5	0.20765
2099	0.16517
2098.5	0.13635
2098	0.05515
2097.5	0.00681
2097	0.09095
2096.5	0.14158
2096	0.13468
2095.5	0.04097
2095	0.01132
2094.5	0.01151
2094	0.04531
2093.5	0.05267
2093	0.07659
2092.5	0.05546
2092	0.08168
2091.5	0.19587
2091	0.22625
2090.5	0.19031
2090	0.15888
2089.5	0.13468
2089	0.21196
2088.5	0.14178
2088	0.07215
2087.5	0.1189
2087	0.15553
2086.5	0.23797
2086	0.26042
2085.5	0.25722
2085	0.17854
2084.5	0.21623
2084	0.30592
2083.5	0.29003
2083	0.2674
2082.5	0.26489
2082	0.32614
2081.5	0.40168
2081	0.29468
2080.5	0.2677
2080	0.16919
2079.5	0.12527
2079	0.15225
2078.5	0.222
2078	0.28648
2077.5	0.19701
2077	0.09703
2076.5	0.08299
2076	0.13804
2075.5	0.13677
2075	0.17439
2074.5	0.15777
2074	0.22616
2073.5	0.18658
2073	0.3268
2072.5	0.25009
2072	0.27178
2071.5	0.31239
2071	0.28998
2070.5	0.24197
2070	0.24569
2069.5	0.21613
2069	0.36335
2068.5	0.30328
2068	0.33316
2067.5	0.29201
2067	0.20966
2066.5	0.22806
2066	0.20631
2065.5	0.3186
2065	0.40011
2064.5	0.34044
2064	0.29798
2063.5	0.22026
2063	0.25988
2062.5	0.2784
2062	0.2922
2061.5	0.29184
2061	0.32227
2060.5	0.31338
2060	0.38034
2059.5	0.39951
2059	0.32464
2058.5	0.40174
2058	0.36553
2057.5	0.32949
2057	0.24229
2056.5	0.25492
2056	0.34743
2055.5	0.28403
2055	0.38134
2054.5	0.32315
2054	0.32765
2053.5	0.29895
2053	0.30201
2052.5	0.37223
2052	0.30857
2051.5	0.26275
2051	0.21591
2050.5	0.17003
2050	0.18565
2049.5	0.21338
2049	0.34147
2048.5	0.38621
2048	0.45675
2047.5	0.32677
2047	0.24704
2046.5	0.29043
2046	0.41057
2045.5	0.43878
2045	0.36466
2044.5	0.25419
2044	0.25006
2043.5	0.25929
2043	0.30916
2042.5	0.3174
2042	0.35776
2041.5	0.28855
2041	0.38295
2040.5	0.35477
2040	0.37826
2039.5	0.31033
2039	0.31871
2038.5	0.36955
2038	0.40404
2037.5	0.42672
2037	0.41028
2036.5	0.40259
2036	0.38828
2035.5	0.39497
2035	0.40187
2034.5	0.43009
2034	0.44557
2033.5	0.51187
2033	0.42892
2032.5	0.26843
2032	0.28459
2031.5	0.35631
2031	0.35505
2030.5	0.45536
2030	0.33127
2029.5	0.44763
2029	0.47351
2028.5	0.42734
2028	0.45983
2027.5	0.42704
2027	0.4709
2026.5	0.4798
2026	0.47282
2025.5	0.43961
2025	0.48175
2024.5	0.46828
2024	0.51145
2023.5	0.54453
2023	0.56572
2022.5	0.50873
2022	0.52672
2021.5	0.49962
2021	0.54454
2020.5	0.58562
2020	0.55407
2019.5	0.47294
2019	0.4352
2018.5	0.40253
2018	0.45881
2017.5	0.42312
2017	0.47205
2016.5	0.58392
2016	0.56363
2015.5	0.50733
2015	0.41209
2014.5	0.38821
2014	0.42644
2013.5	0.52259
2013	0.48311
2012.5	0.5245
2012	0.51203
2011.5	0.47617
2011	0.46944
2010.5	0.48362
2010	0.56599
2009.5	0.63732
2009	0.61322
2008.5	0.61361
2008	0.60719
2007.5	0.71562
2007	0.71369
2006.5	0.72461
2006	0.65585
2005.5	0.62477
2005	0.59424
2004.5	0.62142
2004	0.61507
2003.5	0.53768
2003	0.49565
2002.5	0.48271
2002	0.45606
2001.5	0.47463
2001	0.51704
2000.5	0.48844
2000	0.44147
1999.5	0.4415
1999	0.45286
1998.5	0.46919
1998	0.59252
1997.5	0.62644
1997	0.55696
1996.5	0.58522
1996	0.66224
1995.5	0.6372
1995	0.60561
1994.5	0.63269
1994	0.59872
1993.5	0.59379
1993	0.60348
1992.5	0.5761
1992	0.64636
1991.5	0.61717
1991	0.64767
1990.5	0.51509
1990	0.48552
1989.5	0.4121
1989	0.43563
1988.5	0.46592
1988	0.49354
1987.5	0.56108
1987	0.65392
1986.5	0.67699
1986	0.65908
1985.5	0.59827
1985	0.64328
1984.5	0.65171
1984	0.5655
1983.5	0.52666
1983	0.58102
1982.5	0.59212
1982	0.71173
1981.5	0.76732
1981	0.75537
1980.5	0.67065
1980	0.58591
1979.5	0.55906
1979	0.61506
1978.5	0.68057
1978	0.60061
1977.5	0.497
1977	0.56754
1976.5	0.60246
1976	0.65355
1975.5	0.65683
1975	0.70158
1974.5	0.72246
1974	0.72153
1973.5	0.64138
1973	0.69443
1972.5	0.74273
1972	0.74449
1971.5	0.63065
1971	0.53793
1970.5	0.50122
1970	0.60333
1969.5	0.60468
1969	0.62898
1968.5	0.64639
1968	0.69608
1967.5	0.61089
1967	0.54272
1966.5	0.55604
1966	0.73957
1965.5	0.9435
1965	0.85673
1964.5	0.80324
1964	0.74219
1963.5	0.72338
1963	0.79168
1962.5	0.74395
1962	0.71205
1961.5	0.62509
1961	0.57749
1960.5	0.65856
1960	0.7355
1959.5	0.82655
1959	0.80989
1958.5	0.97756
1958	0.82437
1957.5	0.90893
1957	0.81593
1956.5	0.80071
1956	0.67159
1955.5	0.6608
1955	0.63762
1954.5	0.83353
1954	0.78687
1953.5	0.78052
1953	0.75932
1952.5	0.80103
1952	0.87285
1951.5	0.88474
1951	0.81097
1950.5	0.91436
1950	0.89979
1949.5	0.83545
1949	0.76738
1948.5	0.74445
1948	0.72464
1947.5	0.71062
1947	0.71617
1946.5	0.75748
1946	0.84253
1945.5	0.75537
1945	0.78149
1944.5	0.74893
1944	0.74248
1943.5	0.72973
1943	0.64026
1942.5	0.68182
1942	0.54719
1941.5	0.52704
1941	0.56904
1940.5	0.66673
1940	0.78114
1939.5	0.81105
1939	0.6629
1938.5	0.70445
1938	0.7027
1937.5	0.91667
1937	0.89838
1936.5	0.90063
1936	0.74639
1935.5	0.77539
1935	0.71999
1934.5	0.67733
1934	0.68394
1933.5	0.6581
1933	0.6951
1932.5	0.82286
1932	0.87463
1931.5	0.72372
1931	0.6759
1930.5	0.70868
1930	0.87569
1929.5	0.9559
1929	0.8396
1928.5	0.75803
1928	0.73864
1927.5	0.81035
1927	0.74166
1926.5	0.733
1926	0.76681
1925.5	0.80567
1925	0.85324
1924.5	0.80573
1924	0.79195
1923.5	0.79339
1923	0.724
1922.5	0.70567
1922	0.71725
1921.5	0.72801
1921	0.79842
1920.5	0.78845
1920	0.70338
1919.5	0.69901
1919	0.6797
1918.5	0.74398
1918	0.75313
1917.5	0.8023
1917	0.8409
1916.5	0.79506
1916	0.72125
1915.5	0.60475
1915	0.63086
1914.5	0.76679
1914	0.75312
1913.5	0.73733
1913	0.70329
1912.5	0.61796
1912	0.58567
1911.5	0.56345
1911	0.6807
1910.5	0.74331
1910	0.62453
1909.5	0.56943
1909	0.47738
1908.5	0.56746
1908	0.60062
1907.5	0.6269
1907	0.66065
1906.5	0.66367
1906	0.61747
1905.5	0.59117
1905	0.61207
1904.5	0.57408
1904	0.62852
1903.5	0.59952
1903	0.64159
1902.5	0.57299
1902	0.55396
1901.5	0.48133
1901	0.53045
1900.5	0.56206
1900	0.57905
1899.5	0.56711
1899	0.5995
1898.5	0.52805
1898	0.4721
1897.5	0.4365
1897	0.40913
1896.5	0.46999
1896	0.44473
1895.5	0.49508
1895	0.51413
1894.5	0.51348
1894	0.52442
1893.5	0.54958
1893	0.52766
1892.5	0.46763
1892	0.31843
1891.5	0.33061
1891	0.34824
1890.5	0.38281
1890	0.39106
1889.5	0.43471
1889	0.40978
1888.5	0.37891
1888	0.34674
1887.5	0.34813
1887	0.35277
1886.5	0.32623
1886	0.34177
1885.5	0.27506
1885	0.26134
1884.5	0.25419
1884	0.28982
1883.5	0.32126
1883	0.32426
1882.5	0.30236
1882	0.28935
1881.5	0.30685
1881	0.32944
1880.5	0.32805
1880	0.32257
1879.5	0.25598
1879	0.24752
1878.5	0.23704
1878	0.28979
1877.5	0.27168
1877	0.26617
1876.5	0.23123
1876	0.23417
1875.5	0.2211
1875	0.1982
1874.5	0.14017
1874	0.11211
1873.5	0.15421
1873	0.10588
1872.5	0.14211
1872	0.10471
1871.5	0.13526
1871	0.12773
1870.5	0.09458
1870	0.08953
1869.5	0.08001
1869	0.09454
1868.5	0.11192
1868	0.10919
1867.5	0.1196
1867	0.109
1866.5	0.10973
1866	0.0743
1865.5	0.05603
1865	0.07678
1864.5	0.09307
1864	0.11008
1863.5	0.07911
1863	0.05312
1862.5	-0.00429
1862	-0.00927
1861.5	-0.01587
1861	0.00121
1860.5	0.02705
1860	0.03419
1859.5	0.03005
1859	0.01565
1858.5	0.01107
1858	0.01821
1857.5	0.00445
1857	0.01573
1856.5	0.02162
1856	0.01914
1855.5	0.00979
1855	0.03737
1854.5	0.06329
1854	0.05199
1853.5	0.04199
1853	0.02959
1852.5	0.01635
1852	0.03176
1851.5	0.01762
1851	0.01936
1850.5	0.00534
1850	0.00288
1849.5	0.02425
1849	0.02615
1848.5	0.01372
1848	-0.02133
1847.5	-0.00771
1847	0.00299
1846.5	0.00272
1846	0.02294
1845.5	0.01944
1845	0.03634
1844.5	0.0451
1844	0.04066
1843.5	0.01771
1843	-0.03797
1842.5	-0.04495
1842	-0.01042
1841.5	0.03003
1841	0.03646
1840.5	0.02721
1840	0.01636
1839.5	0.0194
1839	0.0078
1838.5	0.0062
1838	0.000159885
1837.5	0.01488
1837	0.03024
1836.5	0.03286
1836	0.00812
1835.5	0.01893
1835	0.03059
1834.5	0.06675
1834	0.06522
1833.5	0.04811
1833	0.0209
1832.5	0.02198
1832	-0.00253
1831.5	0.00573
1831	0.00438
1830.5	0.02364
1830	0.03264
1829.5	0.04643
1829	0.0472
1828.5	0.02642
1828	0.00305
1827.5	-0.00121
1827	0.00339
1826.5	0.01849
1826	0.02978
1825.5	0.02411
1825	-1.21292e-05
1824.5	-0.01705
1824	-0.00776
1823.5	-0.01034
1823	0.000264929
1822.5	-0.00585
1822	0.02268
1821.5	-0.00265
1821	0.00617
1820.5	0.00203
1820	0.01088
1819.5	0.00386
1819	0.02952
1818.5	0.02614
1818	0.01373
1817.5	0.00685
1817	0.0128
1816.5	0.02044
1816	0.0191
1815.5	0.02333
1815	0.00901
1814.5	0.02226
1814	0.02172
1813.5	0.02574
1813	0.02221
1812.5	0.00803
1812	0.01015
1811.5	0.00426
1811	-0.000303459
1810.5	-0.00366
1810	-0.00431
1809.5	-0.00453
1809	0.00555
1808.5	0.00293
1808	-0.00539
1807.5	-0.00919
1807	-0.02154
1806.5	-0.00997
1806	0.000456785
1805.5	0.02006
1805	0.01115
1804.5	0.00703
1804	-0.01422
1803.5	-0.00269
1803	0.000694928
1802.5	0.00263
1802	0.01718
1801.5	0.00742
1801	0.01382
1800.5	0.00432
1800	-0.00512
1799.5	-0.00325
1799	-0.00354
1798.5	0.00969
1798	0.02113
1797.5	0.0126
1797	0.00431
1796.5	0.00851
1796	0.00301
1795.5	-0.000340522
1795	-0.01051
1794.5	0.00467
1794	0.01583
1793.5	0.02476
1793	0.02221
1792.5	0.02687
1792	0.01384
1791.5	0.00413
1791	-0.01152
1790.5	-0.01114
1790	-0.0065
1789.5	-0.01109
1789	0.00179
1788.5	0.00201
1788	-0.000902785
1787.5	-0.00509
1787	0.00763
1786.5	0.00525
1786	-0.000575027
1785.5	-0.00359
1785	0.01975
1784.5	0.02814
1784	0.02612
1783.5	0.02234
1783	0.0159
1782.5	0.00454
1782	-0.00637
1781.5	0.000145527
1781	0.00361
1780.5	0.00564
1780	0.01935
1779.5	0.02529
1779	0.01245
1778.5	0.01643
1778	0.01771
1777.5	0.02827
1777	0.02324
1776.5	0.02818
1776	0.02482
1775.5	0.01856
1775	-0.00133
1774.5	0.00104
1774	0.01187
1773.5	0.01522
1773	0.03037
1772.5	0.02857
1772	0.03137
1771.5	0.01824
1771	0.01869
1770.5	0.02219
1770	0.01269
1769.5	0.01568
1769	0.00513
1768.5	0.01554
1768	0.02244
1767.5	0.03206
1767	0.02534
1766.5	0.02171
1766	0.01612
1765.5	0.01779
1765	0.02055
1764.5	0.03398
1764	0.03713
1763.5	0.0247
1763	-0.00452
1762.5	-0.01344
1762	-0.01569
1761.5	-0.000598993
1761	0.00767
1760.5	0.01409
1760	0.00921
1759.5	0.00492
1759	0.00678
1758.5	-0.000487597
1758	0.00369
1757.5	0.00799
1757	0.01232
1756.5	0.00405
1756	-0.000365193
1755.5	0.00507
1755	0.00722
1754.5	0.01188
1754	0.00878
1753.5	0.00286
1753	-0.01499
1752.5	-0.00544
1752	-0.01231
1751.5	-0.00634
1751	0.00171
1750.5	0.00653
1750	0.00709
1749.5	-0.01083
1749	-0.01062
1748.5	-0.00262
1748	0.02021
1747.5	0.01223
1747	0.00804
1746.5	-5.04624e-05
1746	0.000893354
1745.5	-0.00283
1745	0.00312
1744.5	-0.00304
1744	-0.00747
1743.5	-0.00549
1743	0.000785056
1742.5	0.00332
1742	-0.00216
1741.5	0.00804
1741	0.00301
1740.5	0.00848
1740	-9.21718e-05
1739.5	-0.00315
1739	-0.00627
1738.5	-0.00822
1738	-0.00995
1737.5	-0.00977
1737	-0.01192
1736.5	-0.00925
1736	-0.00659
1735.5	0.00177
1735	0.00787
1734.5	0.00146
1734	-0.0036
1733.5	-0.01097
1733	-0.01027
1732.5	-0.00705
1732	-0.00513
1731.5	-0.01388
1731	-0.01738
1730.5	-0.00932
1730	-0.00128
1729.5	0.00835
1729	0.00375
1728.5	0.00593
1728	-0.00259
1727.5	0.000984587
1727	-0.01234
1726.5	-0.01526
1726	-0.01165
1725.5	-0.00416
1725	-0.00463
1724.5	-0.01009
1724	-0.00911
1723.5	0.00345
1723	0.0125
1722.5	0.00356
1722	7.5631e-05
1721.5	-0.01051
1721	-0.01288
1720.5	-0.02059
1720	-0.01397
1719.5	-0.00538
1719	0.00198
1718.5	0.00801
1718	-0.00273
1717.5	-0.00895
1717	-0.01164
1716.5	-0.00538
1716	-0.00514
1715.5	-0.01442
1715	-0.00609
1714.5	-0.00957
1714	-0.00136
1713.5	-0.00452
1713	0.00674
1712.5	0.00768
1712	0.00822
1711.5	0.00397
1711	-0.000838735
1710.5	0.00375
1710	0.0091
1709.5	0.01987
1709	0.01852
1708.5	0.00687
1708	-0.01951
1707.5	-0.01687
1707	-0.00401
1706.5	0.00363
1706	-0.00719
1705.5	-0.01884
1705	-0.02499
1704.5	-0.02326
1704	-0.014
1703.5	-0.00688
1703	-0.00715
1702.5	0.00324
1702	-0.00606
1701.5	-0.00378
1701	-0.00257
1700.5	-0.00129
1700	0.0022
1699.5	0.00375
1699	-0.01241
1698.5	0.00106
1698	0.000498823
1697.5	-0.00147
1697	-0.01037
1696.5	-0.01411
1696	-0.01415
1695.5	-0.02016
1695	-0.01947
1694.5	-0.01024
1694	-0.01156
1693.5	-0.01586
1693	-0.02039
1692.5	-0.01897
1692	-0.01032
1691.5	-0.00887
1691	0.00554
1690.5	-0.00531
1690	-0.00292
1689.5	-0.01332
1689	-0.0179
1688.5	-0.01845
1688	-0.00996
1687.5	-0.00659
1687	0.00985
1686.5	0.01442
1686	0.01606
1685.5	0.00852
1685	-0.01129
1684.5	-0.02249
1684	-0.01333
1683.5	-0.00434
1683	-0.00359
1682.5	0.0108
1682	0.00382
1681.5	0.01625
1681	0.02257
1680.5	0.01575
1680	0.01594
1679.5	0.00578
1679	-0.01077
1678.5	-0.01572
1678	-0.01665
1677.5	-0.00994
1677	-0.00438
1676.5	-0.00837
1676	0.00431
1675.5	0.00677
1675	0.00225
1674.5	-0.00916
1674	-0.00144
1673.5	-0.01103
1673	-0.00382
1672.5	-0.01492
1672	-0.01701
1671.5	-0.02398
1671	-0.01866
1670.5	-0.01362
1670	-0.0084
1669.5	-0.00176
1669	0.000848226
1668.5	0.01787
1668	0.01532
1667.5	0.00616
1667	-0.00677
1666.5	-0.00423
1666	-0.01071
1665.5	-0.01091
1665	-0.00783
1664.5	0.00173
1664	-0.00287
1663.5	0.00312
1663	-0.000752831
1662.5	0.00112
1662	0.00373
1661.5	0.00233
1661	-0.00238
1660.5	-0.00263
1660	0.00589
1659.5	0.01019
1659	0.0158
1658.5	0.01156
1658	0.00666
1657.5	-0.000572056
1657	-0.00355
1656.5	-0.00692
1656	0.0094
1655.5	0.0083
1655	0.00864
1654.5	0.00423
1654	0.00942
1653.5	0.01515
1653	0.02243
1652.5	0.01886
1652	0.01971
1651.5	0.01294
1651	0.02017
1650.5	0.01817
1650	0.01767
1649.5	-0.00221
1649	-0.01154
1648.5	-0.00604
1648	0.00917
1647.5	0.01554
1647	0.0167
1646.5	0.00557
1646	0.00379
1645.5	0.01389
1645	0.01438
1644.5	0.02095
1644	0.00104
1643.5	0.00115
1643	0.00277
1642.5	0.00174
1642	-0.00311
1641.5	0.01229
1641	0.00996
1640.5	0.01331
1640	0.00167
1639.5	0.00351
1639	0.00186
1638.5	0.00532
1638	0.00231
1637.5	0.000484752
1637	0.00905
1636.5	6.44053e-05
1636	0.00132
1635.5	0.00449
1635	0.01274
1634.5	0.00881
1634	0.01719
1633.5	0.01774
1633	0.01795
1632.5	0.01234
1632	0.00336
1631.5	0.00106
1631	0.00379
1630.5	-0.00302
1630	0.00974
1629.5	0.00928
1629	0.02284
1628.5	0.00922
1628	0.01319
1627.5	0.00141
1627	0.00641
1626.5	0.0032
1626	0.00613
1625.5	0.01744
1625	0.0151
1624.5	0.0092
1624	0.00587
1623.5	-0.00516
1623	0.00161
1622.5	0.00306
1622	0.00751
1621.5	0.01911
1621	0.01919
1620.5	0.02447
1620	0.01576
1619.5	0.01142
1619	0.01167
1618.5	0.02315
1618	0.02234
1617.5	0.02185
1617	0.01246
1616.5	0.01243
1616	0.01075
1615.5	0.01086
1615	0.01492
1614.5	0.02124
1614	0.02376
1613.5	0.0095
1613	0.00238
1612.5	0.0081
1612	0.0124
1611.5	0.0191
1611	0.01205
1610.5	0.00873
1610	0.006
1609.5	0.00796
1609	0.02266
1608.5	0.02085
1608	0.00982
1607.5	-0.00134
1607	0.00038108
1606.5	-0.00535
1606	0.01187
1605.5	0.01457
1605	0.02761
1604.5	0.02334
1604	0.01921
1603.5	0.01734
1603	0.01275
1602.5	0.00792
1602	0.01311
1601.5	0.02191
1601	0.02567
1600.5	0.0291
1600	0.02437
1599.5	0.02167
1599	0.02288
1598.5	0.02392
1598	0.02536
1597.5	0.01293
1597	0.00442
1596.5	0.00279
1596	0.00318
1595.5	0.00922
1595	0.00728
1594.5	0.01004
1594	0.01612
1593.5	0.02112
1593	0.03266
1592.5	0.01444
1592	0.00569
1591.5	0.00366
1591	0.02212
1590.5	0.02554
1590	0.03776
1589.5	0.03599
1589	0.03642
1588.5	0.02944
1588	0.01685
1587.5	0.0169
1587	0.01808
1586.5	0.03366
1586	0.02987
1585.5	0.02012
1585	0.00873
1584.5	0.01132
1584	0.01458
1583.5	0.02781
1583	0.03335
1582.5	0.03447
1582	0.02841
1581.5	0.03905
1581	0.03321
1580.5	0.04215
1580	0.03234
1579.5	0.03702
1579	0.01813
1578.5	0.02865
1578	0.02612
1577.5	0.03138
1577	0.03036
1576.5	0.02531
1576	0.03467
1575.5	0.03008
1575	0.03503
1574.5	0.02823
1574	0.02496
1573.5	0.01718
1573	0.01794
1572.5	0.02416
1572	0.02586
1571.5	0.02467
1571	0.02256
1570.5	0.02418
1570	0.02869
1569.5	0.03072
1569	0.02951
1568.5	0.02814
1568	0.0208
1567.5	0.02122
1567	0.02632
1566.5	0.02949
1566	0.03397
1565.5	0.04308
1565	0.04389
1564.5	0.04151
1564	0.03942
1563.5	0.03683
1563	0.03432
1562.5	0.03775
1562	0.02834
1561.5	0.03333
1561	0.03887
1560.5	0.04686
1560	0.05636
1559.5	0.04567
1559	0.04288
1558.5	0.03045
1558	0.02652
1557.5	0.0318
1557	0.02919
1556.5	0.03375
1556	0.03521
1555.5	0.02893
1555	0.03544
1554.5	0.0409
1554	0.04452
1553.5	0.04206
1553	0.0458
1552.5	0.04145
1552	0.03635
1551.5	0.03029
1551	0.03302
1550.5	0.03477
1550	0.04426
1549.5	0.03937
1549	0.04466
1548.5	0.04776
1548	0.06402
1547.5	0.06279
1547	0.05599
1546.5	0.04837
1546	0.05309
1545.5	0.05424
1545	0.0492
1544.5	0.04766
1544	0.04602
1543.5	0.04282
1543	0.04874
1542.5	0.05123
1542	0.0637
1541.5	0.0512
1541	0.05174
1540.5	0.0452
1540	0.05306
1539.5	0.05787
1539	0.05774
1538.5	0.04945
1538	0.05298
1537.5	0.0564
1537	0.05856
1536.5	0.06137
1536	0.05623
1535.5	0.05945
1535	0.05103
1534.5	0.05993
1534	0.05514
1533.5	0.06931
1533	0.06774
1532.5	0.06758
1532	0.06087
1531.5	0.05888
1531	0.06682
1530.5	0.06488
1530	0.06862
1529.5	0.06626
1529	0.07597
1528.5	0.07944
1528	0.07349
1527.5	0.06829
1527	0.06035
1526.5	0.06431
1526	0.0686
1525.5	0.08128
1525	0.07981
1524.5	0.07819
1524	0.07761
1523.5	0.07778
1523	0.08144
1522.5	0.07964
1522	0.08592
1521.5	0.0919
1521	0.08948
1520.5	0.09152
1520	0.08434
1519.5	0.07984
1519	0.07936
1518.5	0.07359
1518	0.07735
1517.5	0.07527
1517	0.08852
1516.5	0.08913
1516	0.09229
1515.5	0.08983
1515	0.08715
1514.5	0.0867
1514	0.08952
1513.5	0.08817
1513	0.09182
1512.5	0.08758
1512	0.09285
1511.5	0.09347
1511	0.09671
1510.5	0.09704
1510	0.09479
1509.5	0.0835
1509	0.07905
1508.5	0.08616
1508	0.09019
1507.5	0.09945
1507	0.09861
1506.5	0.10696
1506	0.10576
1505.5	0.09621
1505	0.09225
1504.5	0.09732
1504	0.10851
1503.5	0.10827
1503	0.10315
1502.5	0.1004
1502	0.09781
1501.5	0.1007
1501	0.09551
1500.5	0.09967
[truncated: 2,601 more rows]

## Sheet: Gd2O3
2500	0.03641		Gd2O3
2499.5	0.03336
2499	0.03023
2498.5	0.02683
2498	0.02705
2497.5	0.02703
2497	0.02491
2496.5	0.02606
2496	0.02978
2495.5	0.02855
2495	0.02901
2494.5	0.02962
2494	0.0293
2493.5	0.02836
2493	0.03166
2492.5	0.02984
2492	0.03134
2491.5	0.03352
2491	0.03223
2490.5	0.03398
2490	0.03326
2489.5	0.0323
2489	0.02841
2488.5	0.0278
2488	0.02884
2487.5	0.02951
2487	0.03029
2486.5	0.02942
2486	0.03016
2485.5	0.03228
2485	0.03096
2484.5	0.0303
2484	0.03024
2483.5	0.03122
2483	0.03393
2482.5	0.03487
2482	0.03281
2481.5	0.03242
2481	0.03215
2480.5	0.03364
2480	0.03048
2479.5	0.03162
2479	0.03213
2478.5	0.03405
2478	0.03513
2477.5	0.03433
2477	0.03446
2476.5	0.03322
2476	0.03043
2475.5	0.02955
2475	0.02978
2474.5	0.02981
2474	0.02972
2473.5	0.03055
2473	0.03173
2472.5	0.03132
2472	0.03023
2471.5	0.03179
2471	0.03367
2470.5	0.03315
2470	0.03102
2469.5	0.03136
2469	0.03204
2468.5	0.0293
2468	0.03038
2467.5	0.03198
2467	0.0315
2466.5	0.03243
2466	0.03324
2465.5	0.0342
2465	0.03346
2464.5	0.03307
2464	0.03229
2463.5	0.03423
2463	0.03398
2462.5	0.03113
2462	0.02956
2461.5	0.02807
2461	0.02833
2460.5	0.02753
2460	0.02531
2459.5	0.02518
2459	0.02481
2458.5	0.02497
2458	0.02463
2457.5	0.02228
2457	0.02176
2456.5	0.02226
2456	0.02451
2455.5	0.02693
2455	0.02703
2454.5	0.02799
2454	0.02818
2453.5	0.02727
2453	0.02498
2452.5	0.02415
2452	0.0251
2451.5	0.0247
2451	0.02402
2450.5	0.02811
2450	0.02852
2449.5	0.02655
2449	0.0233
2448.5	0.02079
2448	0.02253
2447.5	0.02252
2447	0.02198
2446.5	0.02524
2446	0.02801
2445.5	0.02862
2445	0.02767
2444.5	0.02794
2444	0.02727
2443.5	0.02713
2443	0.02625
2442.5	0.02541
2442	0.02736
2441.5	0.0268
2441	0.02576
2440.5	0.02475
2440	0.02421
2439.5	0.02405
2439	0.02218
2438.5	0.02412
2438	0.02322
2437.5	0.02084
2437	0.02365
2436.5	0.02428
2436	0.02387
2435.5	0.02428
2435	0.02324
2434.5	0.0252
2434	0.025
2433.5	0.02396
2433	0.02201
2432.5	0.02306
2432	0.02335
2431.5	0.02318
2431	0.02277
2430.5	0.02127
2430	0.02183
2429.5	0.02217
2429	0.02219
2428.5	0.02195
2428	0.0209
2427.5	0.02134
2427	0.02236
2426.5	0.02229
2426	0.02058
2425.5	0.01833
2425	0.01872
2424.5	0.01987
2424	0.02039
2423.5	0.019
2423	0.01985
2422.5	0.02079
2422	0.01943
2421.5	0.01967
2421	0.0182
2420.5	0.01726
2420	0.01844
2419.5	0.02002
2419	0.0215
2418.5	0.02222
2418	0.02247
2417.5	0.02484
2417	0.0237
2416.5	0.02338
2416	0.02232
2415.5	0.02154
2415	0.0224
2414.5	0.02054
2414	0.02225
2413.5	0.02034
2413	0.02047
2412.5	0.01883
2412	0.01741
2411.5	0.01736
2411	0.01664
2410.5	0.01591
2410	0.01489
2409.5	0.01586
2409	0.01743
2408.5	0.01736
2408	0.01907
2407.5	0.01939
2407	0.01996
2406.5	0.01753
2406	0.01817
2405.5	0.01884
2405	0.01865
2404.5	0.0177
2404	0.01805
2403.5	0.01955
2403	0.02029
2402.5	0.01972
2402	0.01903
2401.5	0.01878
2401	0.01993
2400.5	0.01931
2400	0.01924
2399.5	0.02031
2399	0.01876
2398.5	0.01933
2398	0.01909
2397.5	0.01839
2397	0.01832
2396.5	0.0182
2396	0.01862
2395.5	0.01896
2395	0.01905
2394.5	0.01831
2394	0.01889
2393.5	0.01824
2393	0.01761
2392.5	0.01819
2392	0.01798
2391.5	0.0188
2391	0.01854
2390.5	0.01857
2390	0.01916
2389.5	0.01856
2389	0.01804
2388.5	0.01825
2388	0.01978
2387.5	0.01986
2387	0.01989
2386.5	0.01952
2386	0.02175
2385.5	0.0197
2385	0.02004
2384.5	0.02019
2384	0.01824
2383.5	0.01923
2383	0.01942
2382.5	0.01961
2382	0.01839
2381.5	0.01847
2381	0.01865
2380.5	0.01898
2380	0.02006
2379.5	0.01895
2379	0.01971
2378.5	0.01937
2378	0.02001
2377.5	0.01982
2377	0.01909
2376.5	0.01872
2376	0.01833
2375.5	0.01923
2375	0.01888
2374.5	0.01745
2374	0.01754
2373.5	0.01597
2373	0.01632
2372.5	0.01545
2372	0.01558
2371.5	0.01536
2371	0.01487
2370.5	0.01422
2370	0.01471
2369.5	0.0151
2369	0.01502
2368.5	0.01529
2368	0.0152
2367.5	0.01508
2367	0.01476
2366.5	0.01278
2366	0.01294
2365.5	0.01265
2365	0.01334
2364.5	0.0133
2364	0.01409
2363.5	0.01462
2363	0.01534
2362.5	0.01407
2362	0.01475
2361.5	0.01423
2361	0.01409
2360.5	0.0136
2360	0.0131
2359.5	0.01374
2359	0.01325
2358.5	0.01297
2358	0.01221
2357.5	0.01151
2357	0.01175
2356.5	0.01068
2356	0.01012
2355.5	0.01039
2355	0.00944
2354.5	0.00943
2354	0.01
2353.5	0.0106
2353	0.00973
2352.5	0.00964
2352	0.00962
2351.5	0.00908
2351	0.00867
2350.5	0.00919
2350	0.00877
2349.5	0.0092
2349	0.00805
2348.5	0.00842
2348	0.00807
2347.5	0.00807
2347	0.00775
2346.5	0.00871
2346	0.009
2345.5	0.00896
2345	0.00926
2344.5	0.0095
2344	0.00889
2343.5	0.00969
2343	0.01021
2342.5	0.01042
2342	0.01031
2341.5	0.01095
2341	0.00938
2340.5	0.00907
2340	0.00942
2339.5	0.0096
2339	0.00766
2338.5	0.00792
2338	0.00824
2337.5	0.00862
2337	0.00902
2336.5	0.00848
2336	0.009
2335.5	0.00874
2335	0.00849
2334.5	0.00917
2334	0.00933
2333.5	0.0092
2333	0.00978
2332.5	0.00925
2332	0.00826
2331.5	0.00691
2331	0.00683
2330.5	0.0059
2330	0.00506
2329.5	0.0053
2329	0.00566
2328.5	0.00687
2328	0.0067
2327.5	0.0074
2327	0.00767
2326.5	0.00782
2326	0.00827
2325.5	0.00817
2325	0.00711
2324.5	0.00787
2324	0.00725
2323.5	0.00777
2323	0.00806
2322.5	0.00807
2322	0.00689
2321.5	0.00653
2321	0.00615
2320.5	0.00516
2320	0.0054
2319.5	0.00448
2319	0.00529
2318.5	0.00583
2318	0.0061
2317.5	0.00587
2317	0.00644
2316.5	0.00607
2316	0.00641
2315.5	0.00603
2315	0.00692
2314.5	0.00585
2314	0.00571
2313.5	0.006
2313	0.00623
2312.5	0.00595
2312	0.00508
2311.5	0.00605
2311	0.00618
2310.5	0.00624
2310	0.00657
2309.5	0.00628
2309	0.00558
2308.5	0.00492
2308	0.00558
2307.5	0.0065
2307	0.00608
2306.5	0.00541
2306	0.00536
2305.5	0.00578
2305	0.00508
2304.5	0.0042
2304	0.0038
2303.5	0.0026
2303	0.00309
2302.5	0.00383
2302	0.00314
2301.5	0.00299
2301	0.0025
2300.5	0.00415
2300	0.00381
2299.5	0.00379
2299	0.00433
2298.5	0.00387
2298	0.00414
2297.5	0.00406
2297	0.00383
2296.5	0.00382
2296	0.00424
2295.5	0.00474
2295	0.00558
2294.5	0.00541
2294	0.00518
2293.5	0.0055
2293	0.00528
2292.5	0.00534
2292	0.00628
2291.5	0.00765
2291	0.00866
2290.5	0.00894
2290	0.00919
2289.5	0.0088
2289	0.00841
2288.5	0.00826
2288	0.00744
2287.5	0.0065
2287	0.00669
2286.5	0.0068
2286	0.00684
2285.5	0.00809
2285	0.00718
2284.5	0.00755
2284	0.00774
2283.5	0.00798
2283	0.00823
2282.5	0.00796
2282	0.00846
2281.5	0.00877
2281	0.00875
2280.5	0.00909
2280	0.00944
2279.5	0.00885
2279	0.00918
2278.5	0.00981
2278	0.00958
2277.5	0.0091
2277	0.00988
2276.5	0.00942
2276	0.00961
2275.5	0.00994
2275	0.00987
2274.5	0.00987
2274	0.00993
2273.5	0.00975
2273	0.00963
2272.5	0.01007
2272	0.00994
2271.5	0.01046
2271	0.01062
2270.5	0.01038
2270	0.01103
2269.5	0.01125
2269	0.01065
2268.5	0.01021
2268	0.00947
2267.5	0.00918
2267	0.00951
2266.5	0.00947
2266	0.00939
2265.5	0.00957
2265	0.00997
2264.5	0.01007
2264	0.00942
2263.5	0.0085
2263	0.00801
2262.5	0.00842
2262	0.00893
2261.5	0.00841
2261	0.00881
2260.5	0.00914
2260	0.00899
2259.5	0.0092
2259	0.00826
2258.5	0.00816
2258	0.00847
2257.5	0.00834
2257	0.0079
2256.5	0.00792
2256	0.008
2255.5	0.00771
2255	0.00775
2254.5	0.00761
2254	0.00769
2253.5	0.0077
2253	0.00817
2252.5	0.00773
2252	0.00768
2251.5	0.00762
2251	0.00702
2250.5	0.00639
2250	0.00634
2249.5	0.00611
2249	0.00608
2248.5	0.00618
2248	0.00596
2247.5	0.00565
2247	0.0053
2246.5	0.00473
2246	0.00471
2245.5	0.00459
2245	0.00417
2244.5	0.00513
2244	0.00544
2243.5	0.00548
2243	0.00578
2242.5	0.00564
2242	0.00502
2241.5	0.00443
2241	0.00448
2240.5	0.00446
2240	0.00455
2239.5	0.00409
2239	0.0043
2238.5	0.00381
2238	0.00383
2237.5	0.00372
2237	0.00387
2236.5	0.00344
2236	0.00431
2235.5	0.00413
2235	0.00484
2234.5	0.00425
2234	0.00445
2233.5	0.00452
2233	0.00466
2232.5	0.00459
2232	0.00491
2231.5	0.00467
2231	0.00511
2230.5	0.00456
2230	0.00447
2229.5	0.00472
2229	0.00479
2228.5	0.00504
2228	0.00463
2227.5	0.00488
2227	0.00513
2226.5	0.00553
2226	0.00498
2225.5	0.00481
2225	0.00445
2224.5	0.00466
2224	0.00502
2223.5	0.00504
2223	0.00542
2222.5	0.00546
2222	0.00549
2221.5	0.00585
2221	0.00626
2220.5	0.00641
2220	0.00606
2219.5	0.0057
2219	0.0061
2218.5	0.00585
2218	0.00553
2217.5	0.00513
2217	0.00523
2216.5	0.00521
2216	0.00476
2215.5	0.00538
2215	0.00502
2214.5	0.005
2214	0.00545
2213.5	0.00581
2213	0.00629
2212.5	0.0062
2212	0.00575
2211.5	0.00673
2211	0.00699
2210.5	0.00721
2210	0.00678
2209.5	0.00657
2209	0.00698
2208.5	0.00647
2208	0.00662
2207.5	0.00595
2207	0.0061
2206.5	0.00651
2206	0.00631
2205.5	0.00656
2205	0.00637
2204.5	0.00655
2204	0.00719
2203.5	0.00721
2203	0.00748
2202.5	0.00728
2202	0.00721
2201.5	0.00698
2201	0.00671
2200.5	0.00658
2200	0.00623
2199.5	0.0059
2199	0.00611
2198.5	0.00617
2198	0.00627
2197.5	0.00614
2197	0.00679
2196.5	0.0066
2196	0.00756
2195.5	0.00744
2195	0.00789
2194.5	0.00809
2194	0.00766
2193.5	0.00765
2193	0.00712
2192.5	0.00649
2192	0.00659
2191.5	0.00652
2191	0.00667
2190.5	0.00697
2190	0.00716
2189.5	0.00749
2189	0.00729
2188.5	0.00744
2188	0.00773
2187.5	0.00686
2187	0.00722
2186.5	0.00713
2186	0.00679
2185.5	0.00628
2185	0.00654
2184.5	0.00681
2184	0.00671
2183.5	0.00688
2183	0.00694
2182.5	0.00766
2182	0.00745
2181.5	0.007
2181	0.0065
2180.5	0.00657
2180	0.00639
2179.5	0.006
2179	0.00581
2178.5	0.00579
2178	0.00676
2177.5	0.0067
2177	0.0067
2176.5	0.00706
2176	0.00648
2175.5	0.00665
2175	0.00686
2174.5	0.00642
2174	0.00657
2173.5	0.00657
2173	0.00707
2172.5	0.00635
2172	0.00659
2171.5	0.00658
2171	0.00637
2170.5	0.00612
2170	0.00655
2169.5	0.0067
2169	0.00602
2168.5	0.00587
2168	0.00539
2167.5	0.00511
2167	0.00485
2166.5	0.00496
2166	0.00495
2165.5	0.00486
2165	0.00478
2164.5	0.0053
2164	0.00469
2163.5	0.00474
2163	0.00458
2162.5	0.00434
2162	0.00453
2161.5	0.00431
2161	0.0046
2160.5	0.0049
2160	0.00487
2159.5	0.00474
2159	0.00444
2158.5	0.00448
2158	0.00432
2157.5	0.004
2157	0.00425
2156.5	0.00428
2156	0.00401
2155.5	0.00406
2155	0.00393
2154.5	0.0042
2154	0.00421
2153.5	0.00375
2153	0.00415
2152.5	0.00446
2152	0.00446
2151.5	0.00442
2151	0.00506
2150.5	0.00489
2150	0.00461
2149.5	0.00439
2149	0.00441
2148.5	0.00473
2148	0.00457
2147.5	0.00446
2147	0.00492
2146.5	0.0049
2146	0.00483
2145.5	0.00443
2145	0.00457
2144.5	0.00463
2144	0.00453
2143.5	0.00449
2143	0.0046
2142.5	0.00529
2142	0.00516
2141.5	0.00538
2141	0.00509
2140.5	0.00526
2140	0.00526
2139.5	0.00508
2139	0.00545
2138.5	0.00506
2138	0.00475
2137.5	0.00535
2137	0.0057
2136.5	0.00562
2136	0.00574
2135.5	0.00598
2135	0.00657
2134.5	0.00663
2134	0.00612
2133.5	0.0062
2133	0.00599
2132.5	0.0059
2132	0.00584
2131.5	0.00567
2131	0.00598
2130.5	0.00578
2130	0.00602
2129.5	0.00519
2129	0.00529
2128.5	0.00465
2128	0.00424
2127.5	0.00473
2127	0.0053
2126.5	0.00598
2126	0.00575
2125.5	0.00598
2125	0.00634
2124.5	0.00587
2124	0.0056
2123.5	0.00566
2123	0.00572
2122.5	0.00559
2122	0.00573
2121.5	0.00616
2121	0.00607
2120.5	0.00575
2120	0.00529
2119.5	0.00584
2119	0.00619
2118.5	0.00566
2118	0.00534
2117.5	0.00556
2117	0.00607
2116.5	0.00579
2116	0.00587
2115.5	0.00608
2115	0.00611
2114.5	0.00619
2114	0.0064
2113.5	0.00671
2113	0.00688
2112.5	0.0074
2112	0.00704
2111.5	0.00781
2111	0.0078
2110.5	0.00771
2110	0.00804
2109.5	0.00781
2109	0.00834
2108.5	0.00826
2108	0.00792
2107.5	0.00816
2107	0.00798
2106.5	0.00768
2106	0.00772
2105.5	0.00807
2105	0.00796
2104.5	0.00847
2104	0.00839
2103.5	0.00856
2103	0.00849
2102.5	0.00881
2102	0.00947
2101.5	0.00966
2101	0.00936
2100.5	0.00919
2100	0.00922
2099.5	0.00929
2099	0.00889
2098.5	0.009
2098	0.00952
2097.5	0.01007
2097	0.00969
2096.5	0.00972
2096	0.01006
2095.5	0.00944
2095	0.00949
2094.5	0.00895
2094	0.00855
2093.5	0.00889
2093	0.00982
2092.5	0.00977
2092	0.00965
2091.5	0.00955
2091	0.01019
2090.5	0.00998
2090	0.00935
2089.5	0.00924
2089	0.0091
2088.5	0.00951
2088	0.00909
2087.5	0.0096
2087	0.00984
2086.5	0.00958
2086	0.00982
2085.5	0.01004
2085	0.00981
2084.5	0.00957
2084	0.00903
2083.5	0.00954
2083	0.0094
2082.5	0.00918
2082	0.00931
2081.5	0.00985
2081	0.01004
2080.5	0.01023
2080	0.01028
2079.5	0.01084
2079	0.0112
2078.5	0.01113
2078	0.01151
2077.5	0.01137
2077	0.01138
2076.5	0.0111
2076	0.01128
2075.5	0.01151
2075	0.01085
2074.5	0.01065
2074	0.01097
2073.5	0.01104
2073	0.01142
2072.5	0.01127
2072	0.01127
2071.5	0.01184
2071	0.01163
2070.5	0.01097
2070	0.01095
2069.5	0.01124
2069	0.01136
2068.5	0.01104
2068	0.01077
2067.5	0.01117
2067	0.01123
2066.5	0.01168
2066	0.01119
2065.5	0.01115
2065	0.01162
2064.5	0.01168
2064	0.01182
2063.5	0.01197
2063	0.01169
2062.5	0.01194
2062	0.01267
2061.5	0.01273
2061	0.01244
2060.5	0.01225
2060	0.01205
2059.5	0.01188
2059	0.01189
2058.5	0.01205
2058	0.01248
2057.5	0.0122
2057	0.0124
2056.5	0.01256
2056	0.01229
2055.5	0.01201
2055	0.01167
2054.5	0.012
2054	0.01229
2053.5	0.01249
2053	0.01249
2052.5	0.01274
2052	0.01237
2051.5	0.01258
2051	0.01243
2050.5	0.0122
2050	0.01264
2049.5	0.01257
2049	0.01285
2048.5	0.01304
2048	0.01282
2047.5	0.01278
2047	0.01308
2046.5	0.01313
2046	0.0124
2045.5	0.01254
2045	0.0131
2044.5	0.01389
2044	0.01401
2043.5	0.01413
2043	0.0147
2042.5	0.01542
2042	0.015
2041.5	0.01449
2041	0.01448
2040.5	0.01418
2040	0.01445
2039.5	0.01477
2039	0.0148
2038.5	0.01477
2038	0.01517
2037.5	0.01494
2037	0.01504
2036.5	0.01458
2036	0.01483
2035.5	0.01496
2035	0.0143
2034.5	0.01434
2034	0.01499
2033.5	0.01482
2033	0.01513
2032.5	0.01542
2032	0.01566
2031.5	0.01574
2031	0.01554
2030.5	0.01552
2030	0.01564
2029.5	0.01542
2029	0.01512
2028.5	0.01498
2028	0.01497
2027.5	0.0153
2027	0.01566
2026.5	0.01543
2026	0.01553
2025.5	0.016
2025	0.01712
2024.5	0.0169
2024	0.01648
2023.5	0.01648
2023	0.01716
2022.5	0.01688
2022	0.0172
2021.5	0.01695
2021	0.01747
2020.5	0.01818
2020	0.01874
2019.5	0.01865
2019	0.01801
2018.5	0.01843
2018	0.01948
2017.5	0.01933
2017	0.01924
2016.5	0.01933
2016	0.01985
2015.5	0.01983
2015	0.01966
2014.5	0.01935
2014	0.01945
2013.5	0.01924
2013	0.01927
2012.5	0.01883
2012	0.01868
2011.5	0.01907
2011	0.01899
2010.5	0.01932
2010	0.01949
2009.5	0.01961
2009	0.02011
2008.5	0.02045
2008	0.02051
2007.5	0.0206
2007	0.02044
2006.5	0.02028
2006	0.02006
2005.5	0.02001
2005	0.01993
2004.5	0.0198
2004	0.01967
2003.5	0.02016
2003	0.02003
2002.5	0.0202
2002	0.02081
2001.5	0.02065
2001	0.02063
2000.5	0.02085
2000	0.02073
1999.5	0.02042
1999	0.02023
1998.5	0.02024
1998	0.01994
1997.5	0.02003
1997	0.02022
1996.5	0.02081
1996	0.021
1995.5	0.02068
1995	0.02067
1994.5	0.02096
1994	0.0208
1993.5	0.02068
1993	0.02062
1992.5	0.02078
1992	0.02116
1991.5	0.0211
1991	0.02045
1990.5	0.02037
1990	0.02072
1989.5	0.02105
1989	0.02127
1988.5	0.02135
1988	0.02183
1987.5	0.02245
1987	0.02236
1986.5	0.0218
1986	0.02183
1985.5	0.02196
1985	0.02225
1984.5	0.02202
1984	0.02239
1983.5	0.02248
1983	0.02253
1982.5	0.02281
1982	0.02248
1981.5	0.02273
1981	0.02334
1980.5	0.02303
1980	0.02311
1979.5	0.02281
1979	0.02294
1978.5	0.02237
1978	0.02245
1977.5	0.02179
1977	0.02188
1976.5	0.02223
1976	0.02216
1975.5	0.02261
1975	0.02264
1974.5	0.0231
1974	0.02301
1973.5	0.02271
1973	0.02237
1972.5	0.02185
1972	0.0215
1971.5	0.0211
1971	0.02136
1970.5	0.02173
1970	0.02222
1969.5	0.02275
1969	0.02327
1968.5	0.02311
1968	0.02291
1967.5	0.02344
1967	0.02287
1966.5	0.02245
1966	0.02242
1965.5	0.02198
1965	0.02131
1964.5	0.0217
1964	0.02152
1963.5	0.02115
1963	0.02107
1962.5	0.02095
1962	0.02143
1961.5	0.02238
1961	0.02214
1960.5	0.02204
1960	0.02336
1959.5	0.02338
1959	0.02338
1958.5	0.02295
1958	0.02265
1957.5	0.02291
1957	0.02251
1956.5	0.02195
1956	0.02208
1955.5	0.02253
1955	0.02256
1954.5	0.02256
1954	0.02285
1953.5	0.02365
1953	0.0235
1952.5	0.02357
1952	0.02271
1951.5	0.02256
1951	0.02255
1950.5	0.02183
1950	0.0215
1949.5	0.0223
1949	0.02246
1948.5	0.02282
1948	0.02225
1947.5	0.02246
1947	0.02231
1946.5	0.02191
1946	0.02126
1945.5	0.02132
1945	0.0217
1944.5	0.02166
1944	0.02212
1943.5	0.02154
1943	0.02123
1942.5	0.02088
1942	0.02139
1941.5	0.02156
1941	0.02124
1940.5	0.0218
1940	0.02094
1939.5	0.02161
1939	0.02152
1938.5	0.0216
1938	0.02201
1937.5	0.02206
1937	0.02217
1936.5	0.02226
1936	0.02185
1935.5	0.02184
1935	0.02119
1934.5	0.02085
1934	0.02129
1933.5	0.02142
1933	0.0209
1932.5	0.02076
1932	0.0207
1931.5	0.02095
1931	0.02111
1930.5	0.0211
1930	0.02104
1929.5	0.02128
1929	0.02055
1928.5	0.02021
1928	0.02003
1927.5	0.01935
1927	0.01951
1926.5	0.01981
1926	0.02019
1925.5	0.02053
1925	0.02054
1924.5	0.02076
1924	0.02027
1923.5	0.01984
1923	0.01942
1922.5	0.01952
1922	0.01873
1921.5	0.01819
1921	0.01776
1920.5	0.01818
1920	0.01762
1919.5	0.0173
1919	0.0171
1918.5	0.01715
1918	0.01772
1917.5	0.01745
1917	0.01691
1916.5	0.01665
1916	0.0165
1915.5	0.01677
1915	0.01651
1914.5	0.0162
1914	0.0164
1913.5	0.01626
1913	0.01612
1912.5	0.01617
1912	0.01617
1911.5	0.0165
1911	0.0164
1910.5	0.01634
1910	0.0164
1909.5	0.01659
1909	0.01665
1908.5	0.01579
1908	0.0157
1907.5	0.01562
1907	0.01507
1906.5	0.01469
1906	0.01533
1905.5	0.01544
1905	0.01523
1904.5	0.01499
1904	0.01479
1903.5	0.01512
1903	0.01467
1902.5	0.01408
1902	0.01411
1901.5	0.01418
1901	0.01397
1900.5	0.01381
1900	0.01428
1899.5	0.01414
1899	0.01405
1898.5	0.01388
1898	0.01337
1897.5	0.01356
1897	0.0133
1896.5	0.0127
1896	0.01221
1895.5	0.01224
1895	0.01238
1894.5	0.01214
1894	0.01198
1893.5	0.01223
1893	0.01221
1892.5	0.01217
1892	0.01205
1891.5	0.01178
1891	0.01165
1890.5	0.01185
1890	0.01122
1889.5	0.01136
1889	0.01125
1888.5	0.01102
1888	0.01101
1887.5	0.01108
1887	0.01099
1886.5	0.01086
1886	0.01057
1885.5	0.01071
1885	0.01051
1884.5	0.01022
1884	0.01029
1883.5	0.01022
1883	0.01027
1882.5	0.00988
1882	0.00961
1881.5	0.00996
1881	0.00964
1880.5	0.00949
1880	0.00939
1879.5	0.00926
1879	0.00887
1878.5	0.00845
1878	0.00807
1877.5	0.00764
1877	0.00752
1876.5	0.00764
1876	0.00769
1875.5	0.00773
1875	0.00771
1874.5	0.00805
1874	0.00787
1873.5	0.00756
1873	0.00747
1872.5	0.00732
1872	0.00746
1871.5	0.00745
1871	0.00727
1870.5	0.0074
1870	0.00738
1869.5	0.00686
1869	0.00677
1868.5	0.0067
1868	0.0065
1867.5	0.0064
1867	0.00635
1866.5	0.00638
1866	0.00614
1865.5	0.00604
1865	0.00579
1864.5	0.00557
1864	0.00548
1863.5	0.00515
1863	0.00533
1862.5	0.00525
1862	0.00507
1861.5	0.00519
1861	0.00497
1860.5	0.00524
1860	0.00523
1859.5	0.00525
1859	0.00527
1858.5	0.0052
1858	0.00528
1857.5	0.00526
1857	0.00524
1856.5	0.00524
1856	0.00535
1855.5	0.00524
1855	0.00525
1854.5	0.0052
1854	0.00518
1853.5	0.00501
1853	0.00484
1852.5	0.00481
1852	0.00473
1851.5	0.00466
1851	0.00447
1850.5	0.00438
1850	0.00442
1849.5	0.00442
1849	0.00404
1848.5	0.0042
1848	0.00418
1847.5	0.00407
1847	0.00399
1846.5	0.00408
1846	0.00408
1845.5	0.00398
1845	0.0041
1844.5	0.00403
1844	0.00398
1843.5	0.00406
1843	0.00394
1842.5	0.0039
1842	0.00368
1841.5	0.00359
1841	0.00346
1840.5	0.0035
1840	0.0035
1839.5	0.00361
1839	0.00373
1838.5	0.00365
1838	0.00374
1837.5	0.00376
1837	0.00382
1836.5	0.0037
1836	0.00358
1835.5	0.0036
1835	0.00346
1834.5	0.00343
1834	0.00319
1833.5	0.00319
1833	0.00316
1832.5	0.00321
1832	0.00315
1831.5	0.00317
1831	0.00323
1830.5	0.00338
1830	0.00341
1829.5	0.0032
1829	0.00321
1828.5	0.00321
1828	0.00336
1827.5	0.00343
1827	0.00345
1826.5	0.00339
1826	0.00353
1825.5	0.0035
1825	0.00342
1824.5	0.0033
1824	0.0031
1823.5	0.0031
1823	0.00312
1822.5	0.00318
1822	0.00331
1821.5	0.00333
1821	0.0035
1820.5	0.00362
1820	0.00361
1819.5	0.00378
1819	0.00354
1818.5	0.00364
1818	0.00359
1817.5	0.00366
1817	0.00359
1816.5	0.00348
1816	0.00365
1815.5	0.00357
1815	0.00341
1814.5	0.00338
1814	0.00333
1813.5	0.00327
1813	0.00325
1812.5	0.00334
1812	0.00342
1811.5	0.00348
1811	0.00328
1810.5	0.0033
1810	0.00327
1809.5	0.00333
1809	0.00318
1808.5	0.00318
1808	0.00313
1807.5	0.00291
1807	0.00304
1806.5	0.00299
1806	0.00294
1805.5	0.00305
1805	0.00301
1804.5	0.00313
1804	0.00321
1803.5	0.00333
1803	0.00342
1802.5	0.00343
1802	0.00349
1801.5	0.00356
1801	0.00364
1800.5	0.00346
1800	0.00337
1799.5	0.0034
1799	0.00352
1798.5	0.00361
1798	0.0035
1797.5	0.00349
1797	0.00357
1796.5	0.00356
1796	0.00354
1795.5	0.00334
1795	0.00341
1794.5	0.00344
1794	0.00329
1793.5	0.00322
1793	0.00322
1792.5	0.00327
1792	0.00326
1791.5	0.00334
1791	0.00336
1790.5	0.00345
1790	0.00345
1789.5	0.00346
1789	0.00348
1788.5	0.00348
1788	0.00353
1787.5	0.00361
1787	0.00359
1786.5	0.00354
1786	0.00346
1785.5	0.00349
1785	0.00335
1784.5	0.00338
1784	0.00338
1783.5	0.00344
1783	0.00346
1782.5	0.00338
1782	0.0034
1781.5	0.00343
1781	0.00346
1780.5	0.00353
1780	0.00361
1779.5	0.00359
1779	0.00354
1778.5	0.00342
1778	0.00338
1777.5	0.00338
1777	0.00338
1776.5	0.00345
1776	0.00345
1775.5	0.00352
1775	0.00348
1774.5	0.00366
1774	0.00359
1773.5	0.00355
1773	0.00347
1772.5	0.00347
1772	0.00337
1771.5	0.0033
1771	0.00333
1770.5	0.0033
1770	0.00328
1769.5	0.00337
1769	0.00317
1768.5	0.00331
1768	0.00335
1767.5	0.0034
1767	0.00353
1766.5	0.0035
1766	0.0035
1765.5	0.00347
1765	0.00334
1764.5	0.00333
1764	0.00319
1763.5	0.00311
1763	0.00317
1762.5	0.00314
1762	0.00318
1761.5	0.00311
1761	0.00321
1760.5	0.00324
1760	0.00321
1759.5	0.00321
1759	0.00313
1758.5	0.00308
1758	0.0031
1757.5	0.00305
1757	0.00299
1756.5	0.00288
1756	0.00297
1755.5	0.00297
1755	0.00299
1754.5	0.00295
1754	0.003
1753.5	0.00288
1753	0.00294
1752.5	0.00291
1752	0.00275
1751.5	0.00284
1751	0.0029
1750.5	0.00295
1750	0.00297
1749.5	0.00295
1749	0.003
1748.5	0.00299
1748	0.00285
1747.5	0.00289
1747	0.00282
1746.5	0.00285
1746	0.00286
1745.5	0.00291
1745	0.00302
1744.5	0.00298
1744	0.00294
1743.5	0.00285
1743	0.00281
1742.5	0.00274
1742	0.00264
1741.5	0.00256
1741	0.00259
1740.5	0.0026
1740	0.00271
1739.5	0.00272
1739	0.00282
1738.5	0.00281
1738	0.00274
1737.5	0.0027
1737	0.0026
1736.5	0.00259
1736	0.00251
1735.5	0.00245
1735	0.00251
1734.5	0.00244
1734	0.00243
1733.5	0.00237
1733	0.00239
1732.5	0.00243
1732	0.00243
1731.5	0.00247
1731	0.0026
1730.5	0.00262
1730	0.00267
1729.5	0.00274
1729	0.00274
1728.5	0.00272
1728	0.00264
1727.5	0.00254
1727	0.00255
1726.5	0.0024
1726	0.00242
1725.5	0.00246
1725	0.00245
1724.5	0.00251
1724	0.00247
1723.5	0.00252
1723	0.00258
1722.5	0.00254
1722	0.00254
1721.5	0.00256
1721	0.00258
1720.5	0.00251
1720	0.0025
1719.5	0.00246
1719	0.00241
1718.5	0.00239
1718	0.00235
1717.5	0.00246
1717	0.00251
1716.5	0.00244
1716	0.00248
1715.5	0.00246
1715	0.00252
1714.5	0.00248
1714	0.00232
1713.5	0.00241
1713	0.00236
1712.5	0.00234
1712	0.00234
1711.5	0.00236
1711	0.0024
1710.5	0.00244
1710	0.00253
1709.5	0.00256
1709	0.00254
1708.5	0.00246
1708	0.0024
1707.5	0.0024
1707	0.00236
1706.5	0.00239
1706	0.00238
1705.5	0.00244
1705	0.00252
1704.5	0.00257
1704	0.00263
1703.5	0.00264
1703	0.00266
1702.5	0.00256
1702	0.00263
1701.5	0.00266
1701	0.00274
1700.5	0.00271
1700	0.00254
1699.5	0.0024
1699	0.0024
1698.5	0.0028
1698	0.00265
1697.5	0.00235
1697	0.00219
1696.5	0.00234
1696	0.00248
1695.5	0.00281
1695	0.00244
1694.5	0.00237
1694	0.00255
1693.5	0.00335
1693	0.00355
1692.5	0.00322
1692	0.00294
1691.5	0.00326
1691	0.00331
1690.5	0.0034
1690	0.00394
1689.5	0.00348
1689	0.00381
1688.5	0.00388
1688	0.00414
1687.5	0.00375
1687	0.00329
1686.5	0.00374
1686	0.00384
1685.5	0.00396
1685	0.00373
1684.5	0.0039
1684	0.00374
1683.5	0.00381
1683	0.00396
1682.5	0.00328
1682	0.00384
1681.5	0.00365
1681	0.00367
1680.5	0.00376
1680	0.00338
1679.5	0.00356
1679	0.00365
1678.5	0.00371
1678	0.00367
1677.5	0.00346
1677	0.00339
1676.5	0.00341
1676	0.0038
1675.5	0.00346
1675	0.00391
1674.5	0.00369
1674	0.00366
1673.5	0.00369
1673	0.00388
1672.5	0.00358
1672	0.00389
1671.5	0.00391
1671	0.00345
1670.5	0.0038
1670	0.00397
1669.5	0.00379
1669	0.0034
1668.5	0.0029
1668	0.00292
1667.5	0.00318
1667	0.00331
1666.5	0.00342
1666	0.00313
1665.5	0.00282
1665	0.00291
1664.5	0.00308
1664	0.00265
1663.5	0.00259
1663	0.00237
1662.5	0.00264
1662	0.00313
1661.5	0.003
1661	0.00299
1660.5	0.00275
1660	0.00276
1659.5	0.00261
1659	0.00301
1658.5	0.00303
1658	0.00312
1657.5	0.00323
1657	0.0032
1656.5	0.00376
1656	0.00333
1655.5	0.00311
1655	0.0032
1654.5	0.00315
1654	0.00314
1653.5	0.00347
1653	0.00364
1652.5	0.00381
1652	0.0035
1651.5	0.00376
1651	0.00382
1650.5	0.00401
1650	0.00342
1649.5	0.00351
1649	0.00349
1648.5	0.00337
1648	0.00366
1647.5	0.00354
1647	0.00351
1646.5	0.00368
1646	0.0035
1645.5	0.00319
1645	0.00323
1644.5	0.003
1644	0.00312
1643.5	0.0031
1643	0.00333
1642.5	0.00337
1642	0.00371
1641.5	0.00343
1641	0.00342
1640.5	0.00327
1640	0.00295
1639.5	0.00276
1639	0.00346
1638.5	0.00331
1638	0.00351
1637.5	0.00343
1637	0.00349
1636.5	0.00337
1636	0.00384
1635.5	0.00377
1635	0.00358
1634.5	0.00372
1634	0.00361
1633.5	0.00406
1633	0.00395
1632.5	0.00313
1632	0.00333
1631.5	0.00331
1631	0.00326
1630.5	0.003
1630	0.00282
1629.5	0.00265
1629	0.00263
1628.5	0.00241
1628	0.00267
1627.5	0.00242
1627	0.00255
1626.5	0.00292
1626	0.00299
1625.5	0.00297
1625	0.0028
1624.5	0.00285
1624	0.00315
1623.5	0.00318
1623	0.00319
1622.5	0.0029
1622	0.00323
1621.5	0.00318
1621	0.00343
1620.5	0.00323
1620	0.00307
1619.5	0.00327
1619	0.00321
1618.5	0.00349
1618	0.00332
1617.5	0.00305
1617	0.00269
1616.5	0.00275
1616	0.0028
1615.5	0.00277
1615	0.00275
1614.5	0.00278
1614	0.00256
1613.5	0.00212
1613	0.00235
1612.5	0.00266
1612	0.00256
1611.5	0.0026
1611	0.00307
1610.5	0.00347
1610	0.00336
1609.5	0.00347
1609	0.00381
1608.5	0.00346
1608	0.00333
1607.5	0.00364
1607	0.00362
1606.5	0.00325
1606	0.00324
1605.5	0.00349
1605	0.00307
1604.5	0.00311
1604	0.00308
1603.5	0.00299
1603	0.0028
1602.5	0.00245
1602	0.0027
1601.5	0.00277
1601	0.00284
1600.5	0.00303
1600	0.00293
1599.5	0.00262
1599	0.00247
1598.5	0.00228
1598	0.00194
1597.5	0.00223
1597	0.00218
1596.5	0.00247
1596	0.00272
1595.5	0.00259
1595	0.00276
1594.5	0.00233
1594	0.00273
1593.5	0.0027
1593	0.00262
1592.5	0.00293
1592	0.00279
1591.5	0.0027
1591	0.00283
1590.5	0.00271
1590	0.00252
1589.5	0.00206
1589	0.00226
1588.5	0.00207
1588	0.00227
1587.5	0.00224
1587	0.00237
1586.5	0.00271
1586	0.00268
1585.5	0.00287
1585	0.00317
1584.5	0.00324
1584	0.0035
1583.5	0.00325
1583	0.00307
1582.5	0.00304
1582	0.00318
1581.5	0.00331
1581	0.00304
1580.5	0.00314
1580	0.0029
1579.5	0.00326
1579	0.00317
1578.5	0.00325
1578	0.00318
1577.5	0.00327
1577	0.00376
1576.5	0.00366
1576	0.00379
1575.5	0.00392
1575	0.00381
1574.5	0.0041
1574	0.00391
1573.5	0.00367
1573	0.00322
1572.5	0.00323
1572	0.00306
1571.5	0.00281
1571	0.00275
1570.5	0.00276
1570	0.00324
1569.5	0.00317
1569	0.00324
1568.5	0.00321
1568	0.0031
1567.5	0.00336
1567	0.0036
1566.5	0.00371
1566	0.00353
1565.5	0.00371
1565	0.00369
1564.5	0.00363
1564	0.00312
1563.5	0.00274
1563	0.00267
1562.5	0.0025
1562	0.00242
1561.5	0.00258
1561	0.00206
1560.5	0.00237
1560	0.00243
1559.5	0.00294
1559	0.00302
1558.5	0.00335
1558	0.00345
1557.5	0.00355
1557	0.00385
1556.5	0.00415
1556	0.00423
1555.5	0.00427
1555	0.00449
1554.5	0.00438
1554	0.00456
1553.5	0.00461
1553	0.00416
1552.5	0.00404
1552	0.0037
1551.5	0.004
1551	0.00399
1550.5	0.00391
1550	0.00392
1549.5	0.00341
1549	0.00316
1548.5	0.00344
1548	0.00365
1547.5	0.00331
1547	0.0033
1546.5	0.00316
1546	0.00322
1545.5	0.00343
1545	0.00326
1544.5	0.00322
1544	0.00346
1543.5	0.00363
1543	0.00363
1542.5	0.00406
1542	0.00371
1541.5	0.00399
1541	0.00439
1540.5	0.00441
1540	0.00437
1539.5	0.00453
1539	0.00477
1538.5	0.00487
1538	0.00488
1537.5	0.00474
1537	0.00481
1536.5	0.00519
1536	0.00507
1535.5	0.00508
1535	0.00496
1534.5	0.00483
1534	0.00491
1533.5	0.00525
1533	0.00503
1532.5	0.00518
1532	0.00484
1531.5	0.00457
1531	0.00449
1530.5	0.00411
1530	0.00383
1529.5	0.00393
1529	0.00383
1528.5	0.00414
1528	0.00423
1527.5	0.00418
1527	0.00414
1526.5	0.00414
1526	0.00388
1525.5	0.00419
1525	0.00436
1524.5	0.00457
1524	0.00483
1523.5	0.00484
1523	0.00478
1522.5	0.00504
1522	0.00452
1521.5	0.00441
1521	0.00438
1520.5	0.00419
1520	0.00429
1519.5	0.00452
1519	0.00445
1518.5	0.00429
1518	0.00415
1517.5	0.00423
1517	0.00431
1516.5	0.00457
1516	0.00446
1515.5	0.00466
1515	0.00463
1514.5	0.00514
1514	0.0052
1513.5	0.00534
1513	0.00515
1512.5	0.00508
1512	0.00537
1511.5	0.00527
1511	0.00577
1510.5	0.00586
1510	0.00588
1509.5	0.00621
1509	0.00621
1508.5	0.00613
1508	0.00629
1507.5	0.00636
1507	0.0063
1506.5	0.00652
1506	0.00665
1505.5	0.00677
1505	0.00703
1504.5	0.0068
1504	0.00682
1503.5	0.00708
1503	0.0071
1502.5	0.00723
1502	0.00732
1501.5	0.00711
1501	0.00696
1500.5	0.00704
[truncated: 2,601 more rows]

[truncated: 16 more sheets: TbF3, Tb4O7, DyF3, Dy2O3, HoF3, Ho2O3, ErF3, Er2O3, TmF3, Tm2O3, YbF3, Yb2O3, CeF3, CeO2, LaF3, La2O3]
